# Supplementary material for: Synthesis, characterisation and reactivity studies of chiral β-diketiminate-like supported aluminium Lewis acid complexes towards difficult Diels Alder cycloadditions
Source: Royal Society of Chemistry journal article supplement (doi:10.1039/d3dt00206c), 2023-01-01
Supplement: d3dt00206c1.pdf [file d3dt00206c1.pdf]

# Synthesis, Characterisation and Reactivity studies of Chiral $\beta$ -Diketimate Supported Aluminum Lewis Acid Complexes Towards Difficult Diels Alder Cycloadditions

Deepamali Dissanayake, Craig Forsyth and Dragoslav Vidović\*

School of Chemistry, Monash University, Wellington Rd, Clayton VIC 3800, Australia.

Supporting Information

## Contents

|                                            |    |
|--------------------------------------------|----|
| NMR Spectrum of Ligands and Complexes..... | 2  |
| NMR Spectrum of DA Adducts.....            | 47 |
| HPLC studies of enantiomers.....           | 54 |

NMR Spectrum of Ligands and Complexes  
(oxa = oxazoline)

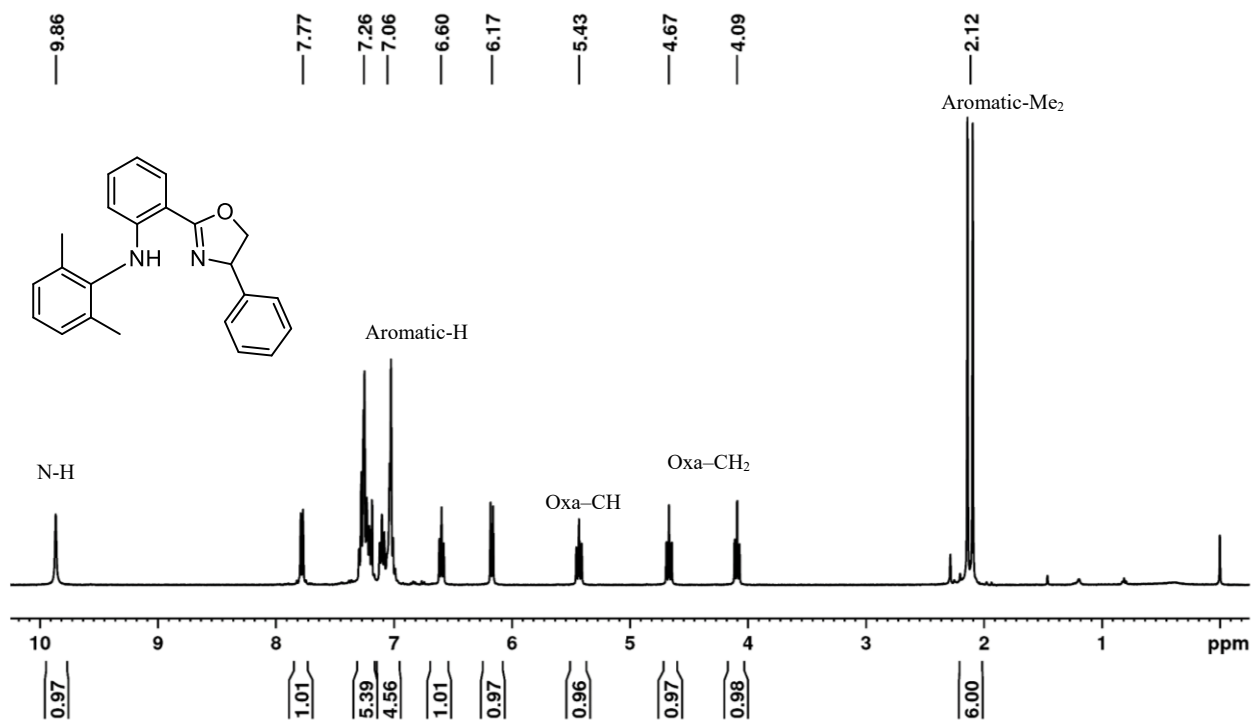

Figure S1. <sup>1</sup>H NMR spectrum of **3H**

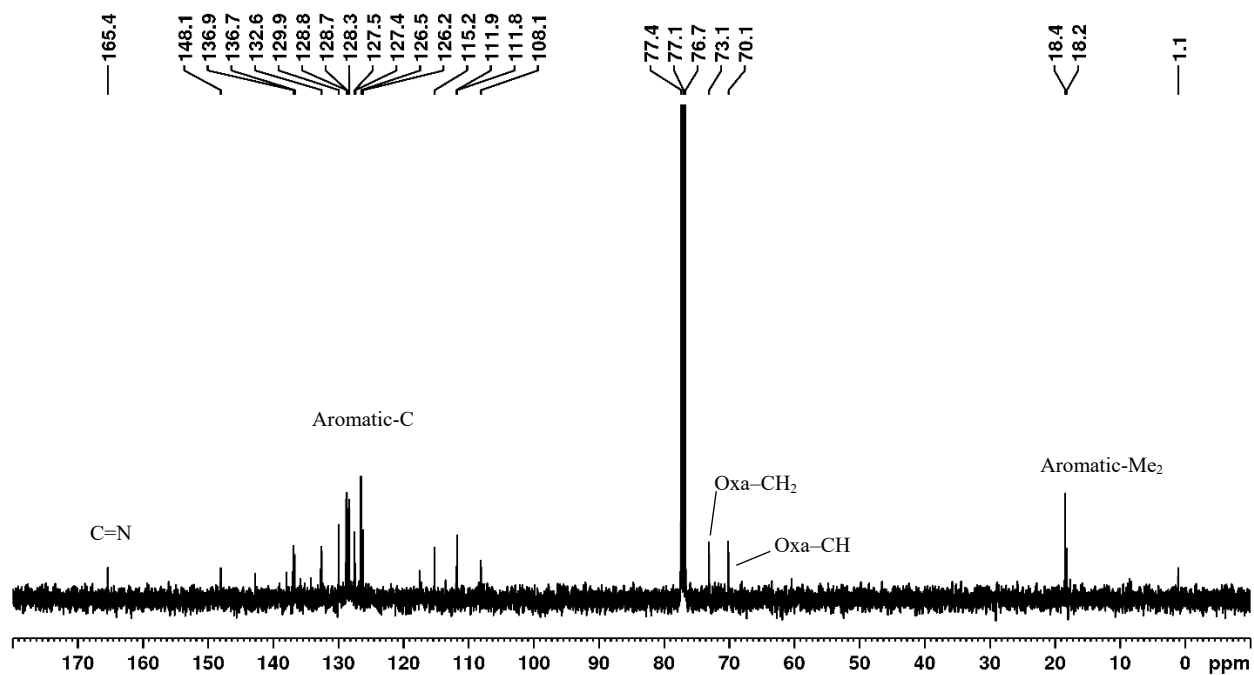

Figure S2. <sup>13</sup>C NMR spectrum of **3H**

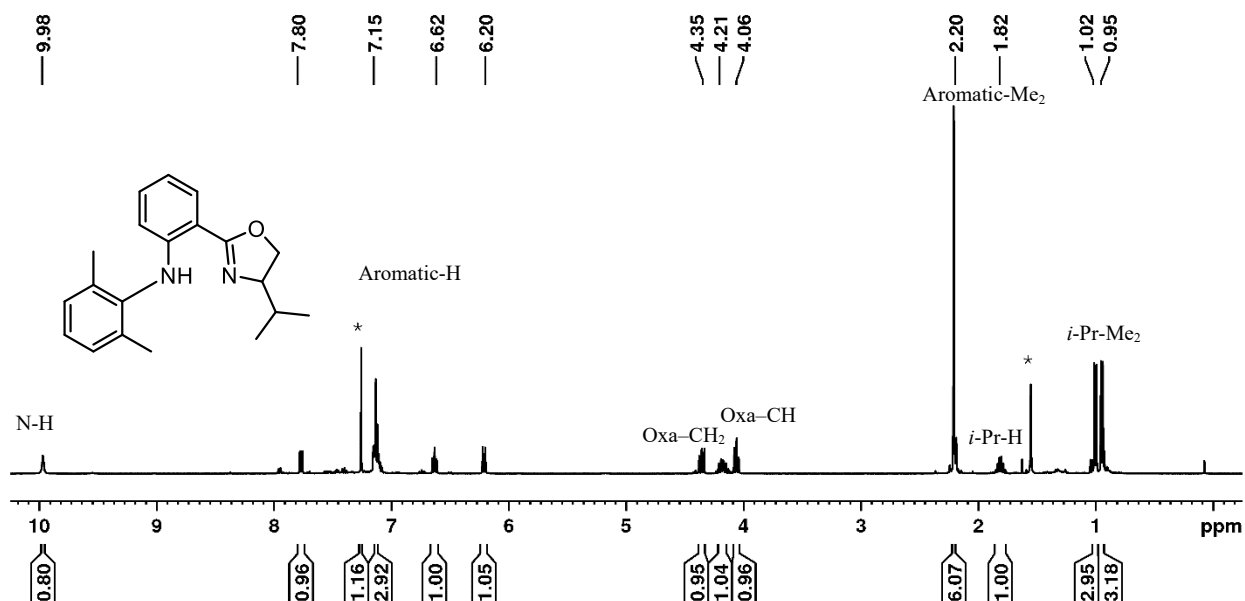

Figure S3. <sup>1</sup>H NMR spectrum of **4aH**. Note: solvent impurities are indicated by \*

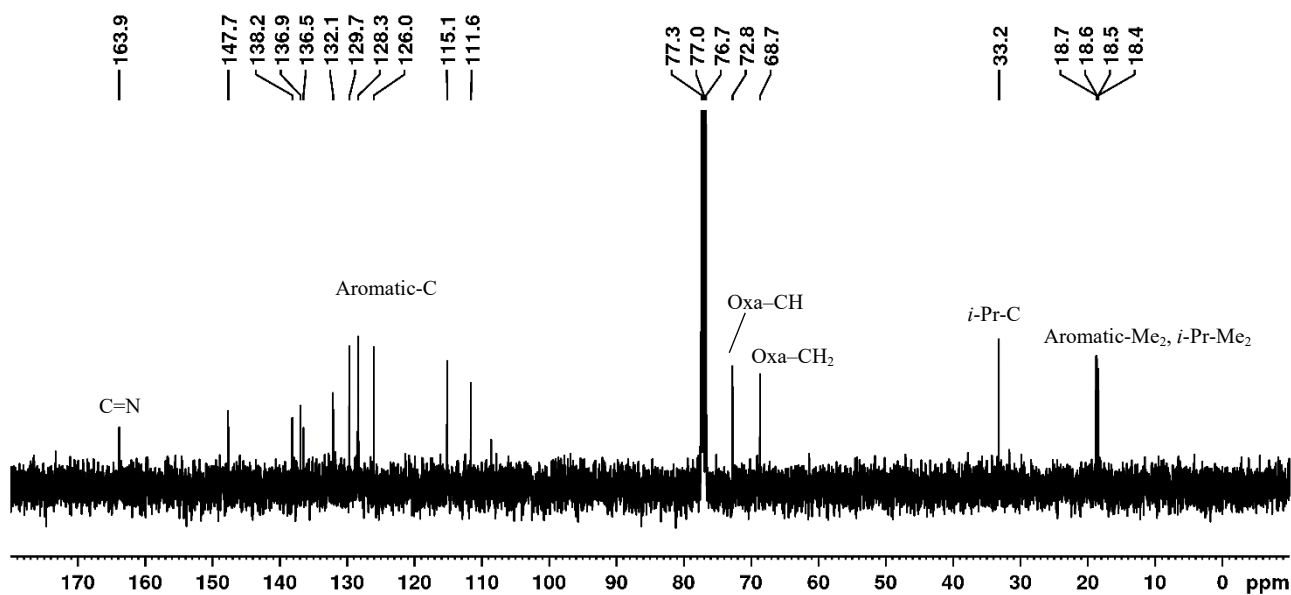

Figure S4. <sup>13</sup>C NMR spectrum of **4aH**

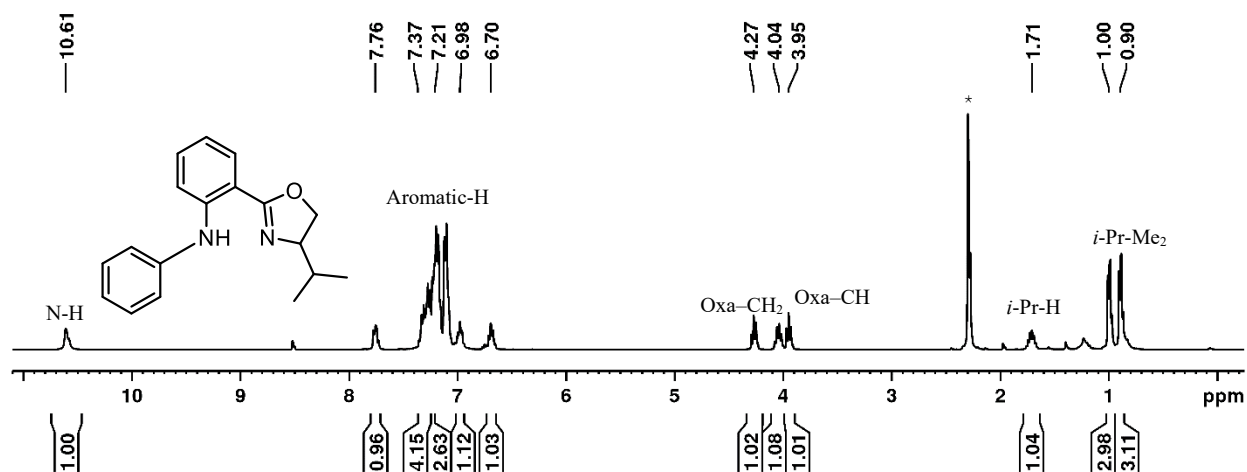

Figure S5. <sup>1</sup>H NMR spectrum of **4bH**. Note: solvent impurities are indicated by \*

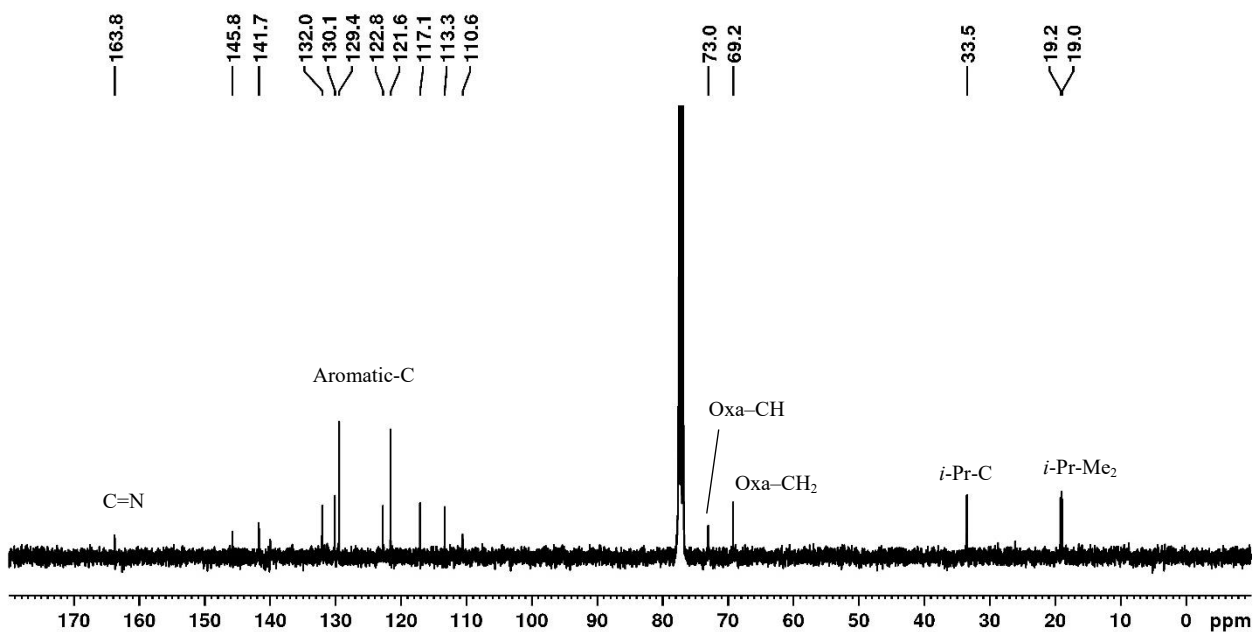

Figure S6. <sup>13</sup>C NMR spectrum of **4bH**.

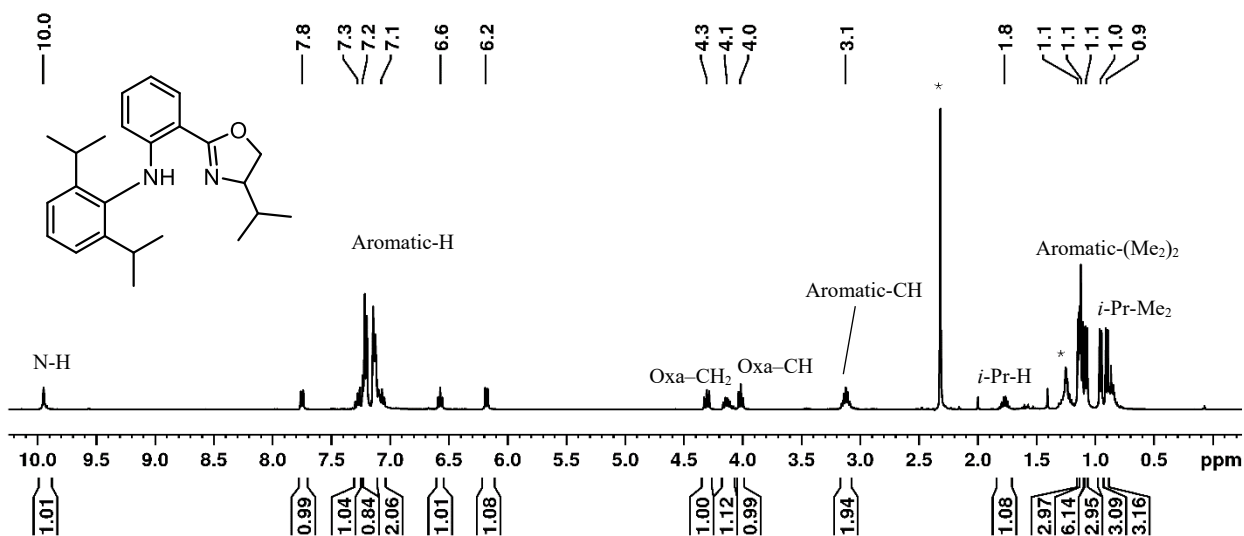

Figure S7.  $^1\text{H}$  NMR spectrum of **4cH**. Note: solvent impurities are indicated by \*

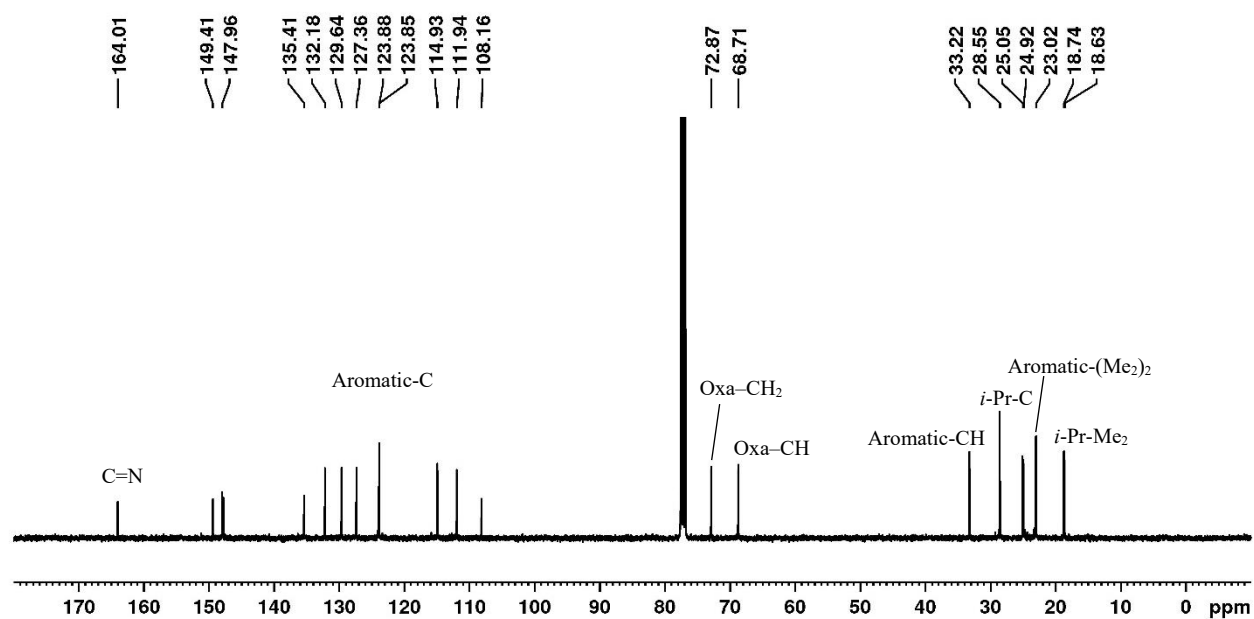

Figure S8.  $^{13}\text{C}$  NMR spectrum of **4cH**.

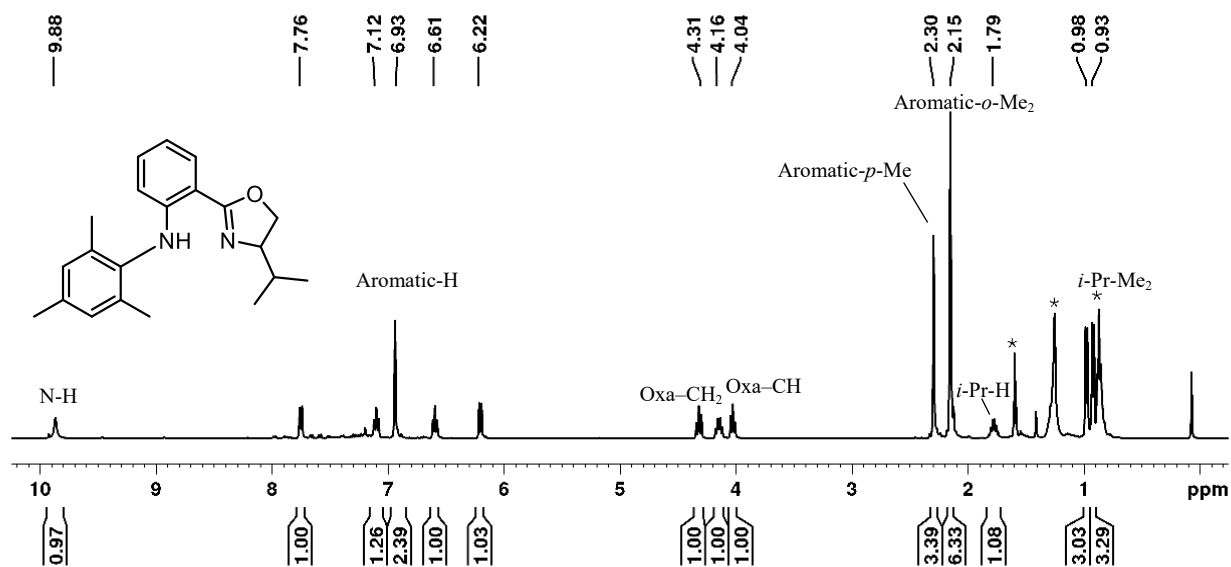

Figure S9.  $^1\text{H}$  NMR spectrum of **4dH**. Note: solvent impurities are indicated by \*

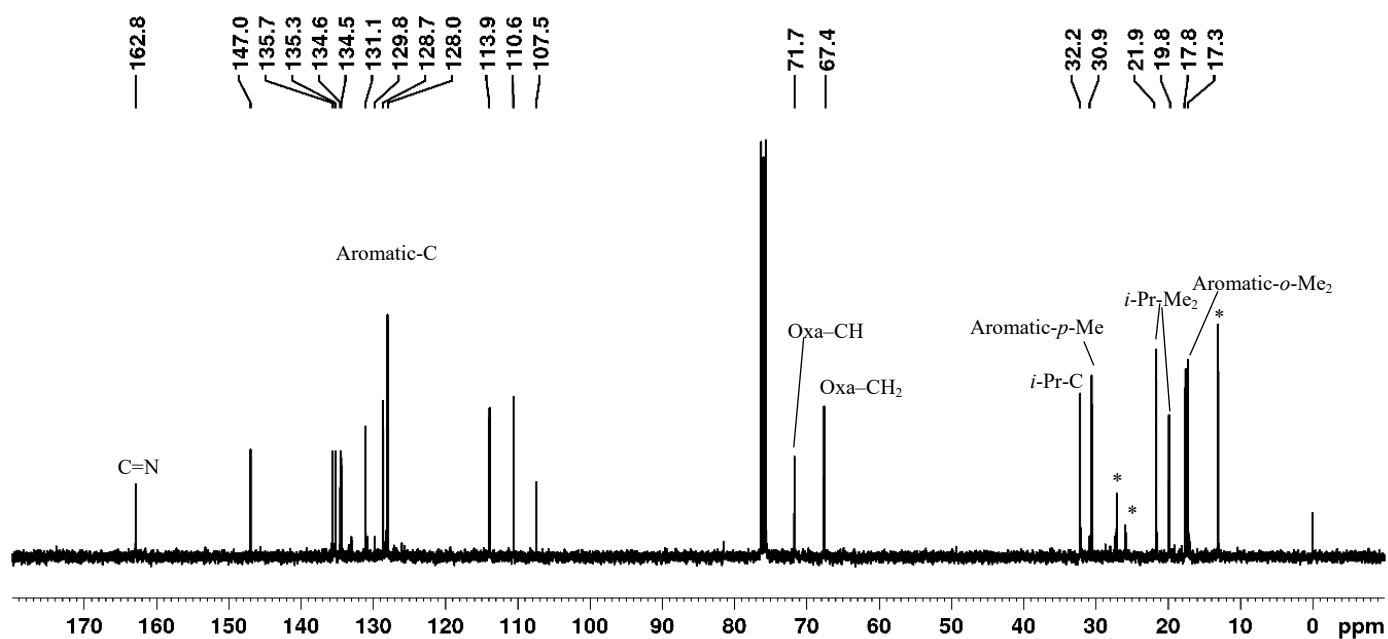

Figure S10.  $^{13}\text{C}$  NMR spectrum of **4dH**. solvent impurities are indicated by \*

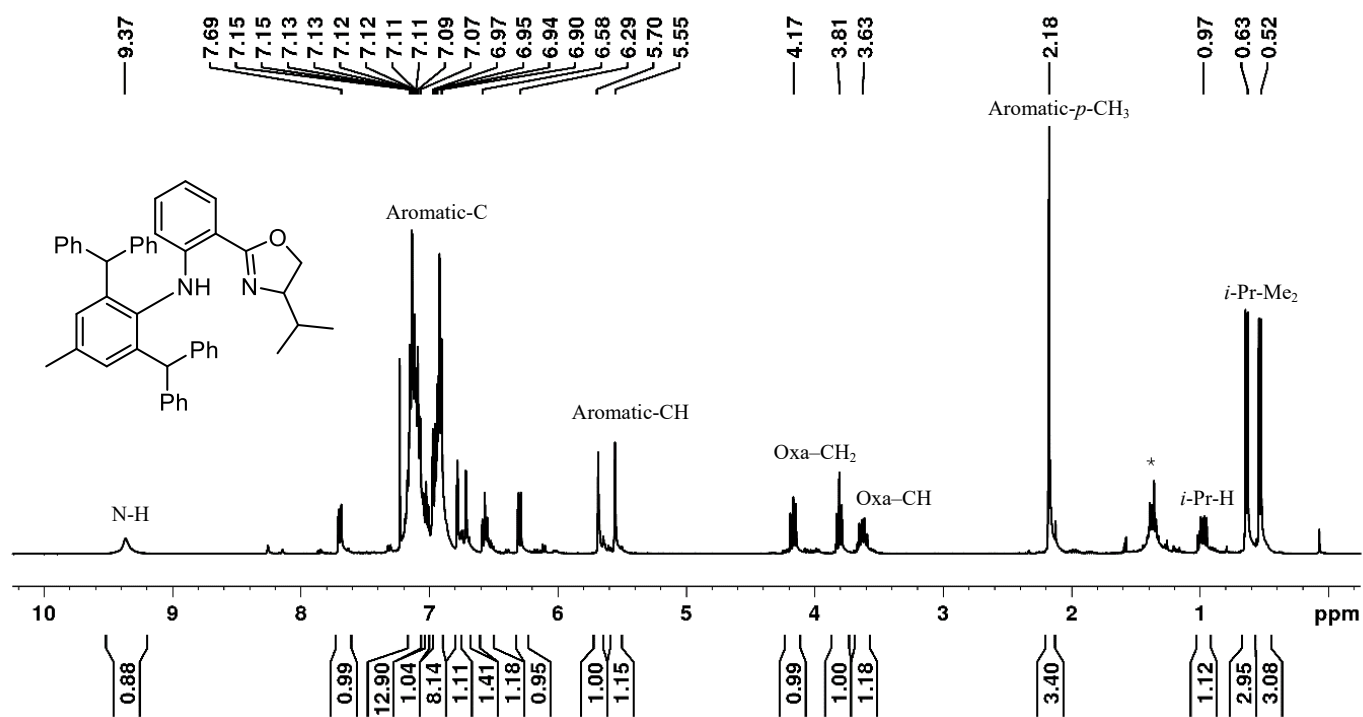

Figure S11.  $^1\text{H}$  NMR spectrum of **4eH**. Note: solvent impurities are indicated by \*

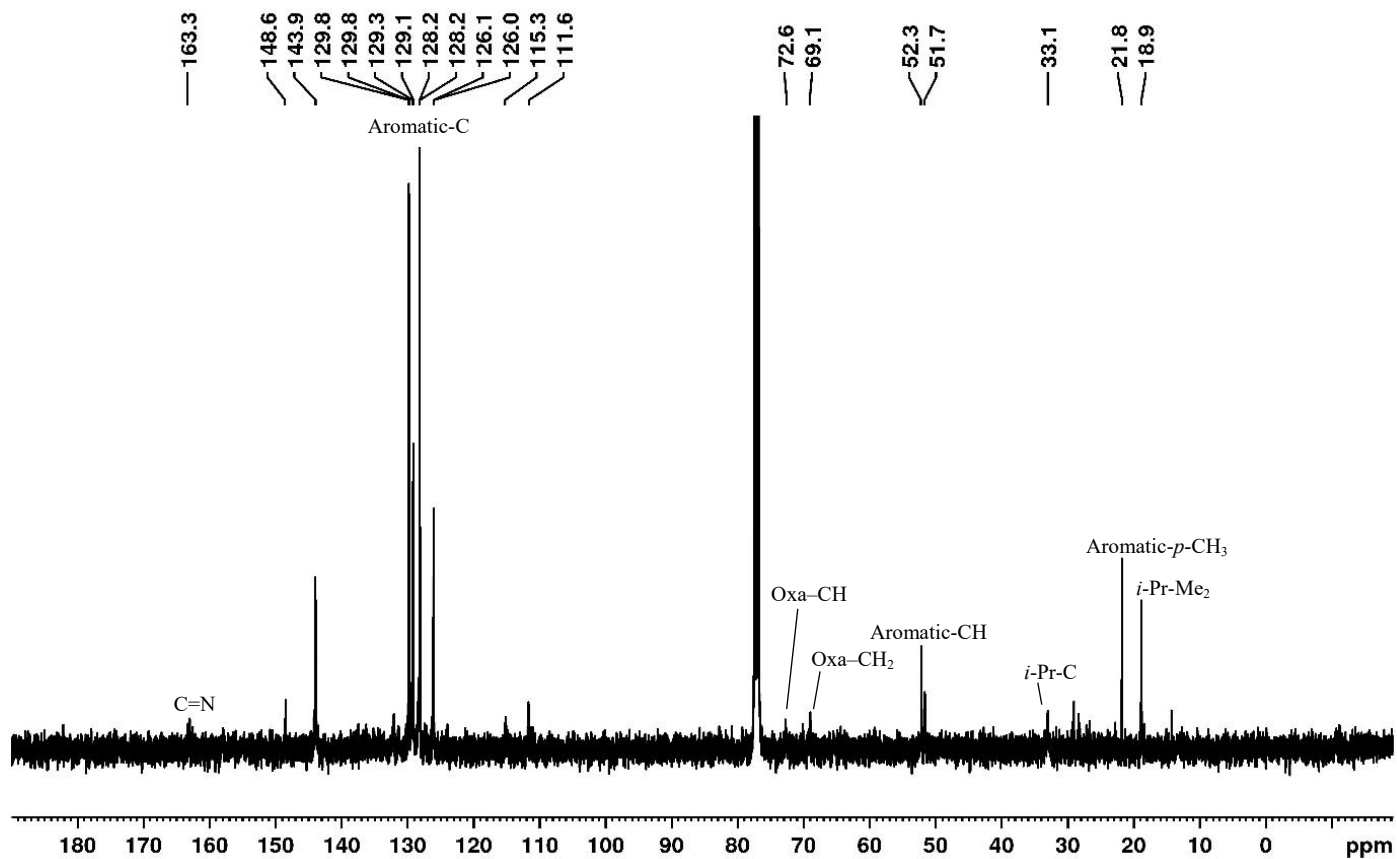

Figure S12.  $^{13}\text{C}$  NMR spectrum of **4eH**

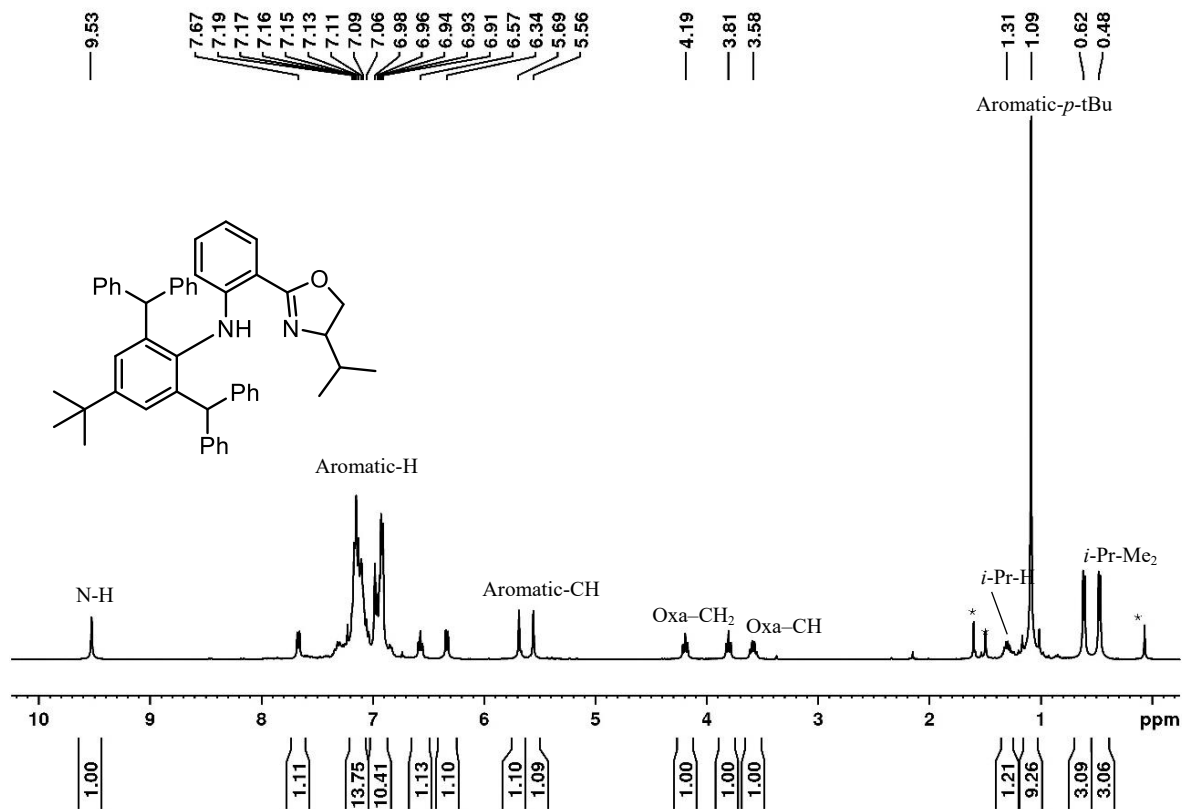

Figure S13. <sup>1</sup>H NMR spectrum of **4fH**. Note: solvent impurities are indicated by \*

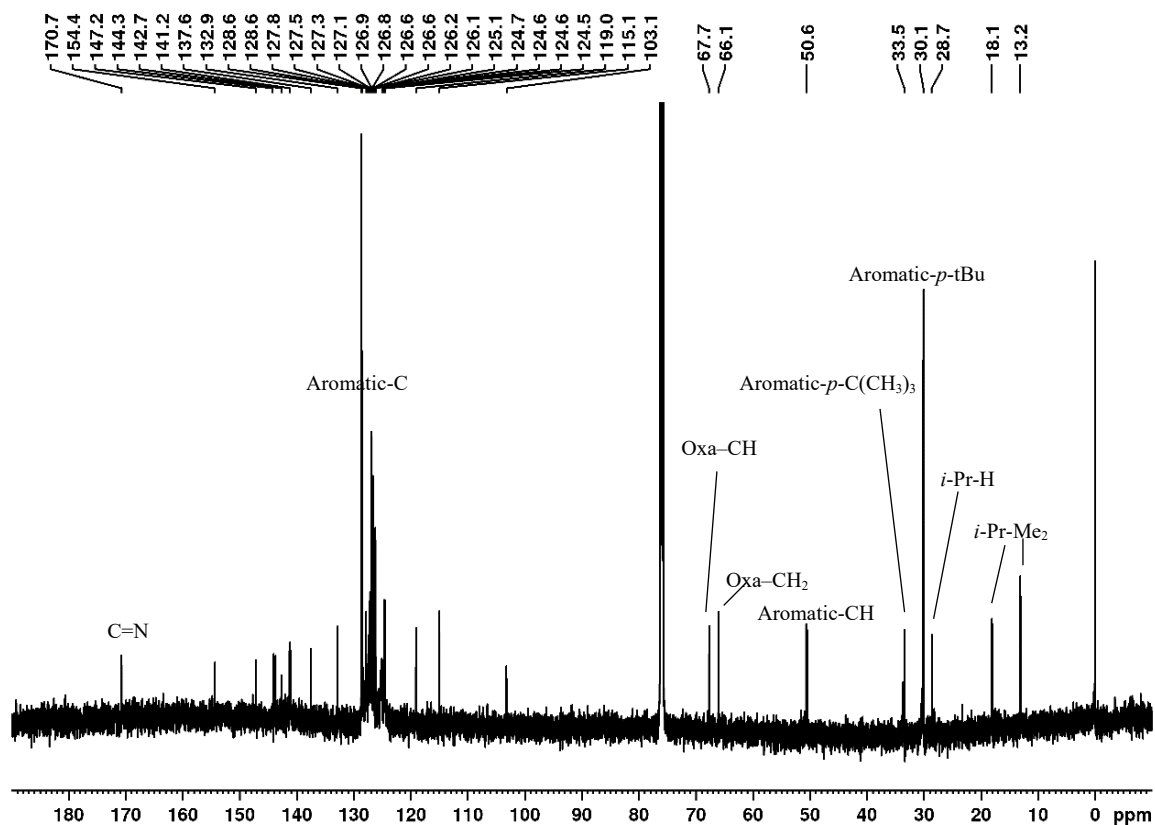

Figure S14. <sup>13</sup>C NMR spectrum of **4fH**.



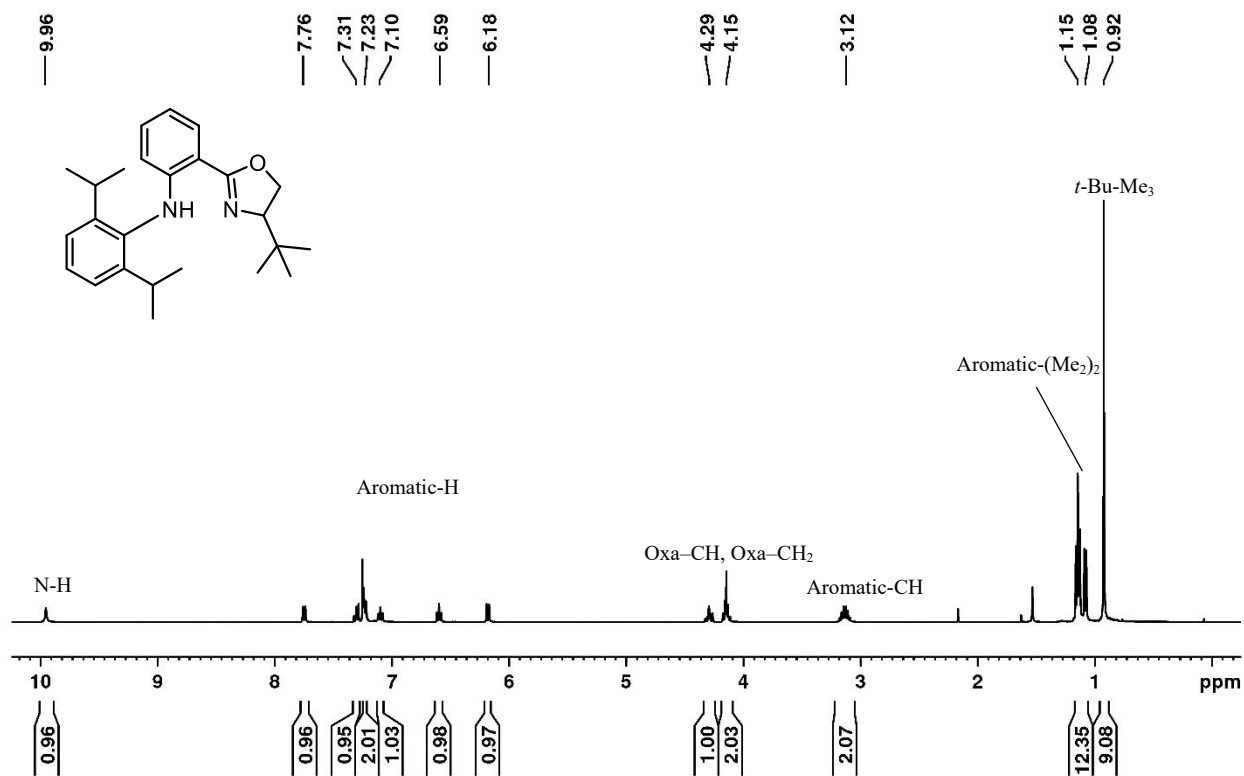

Figure S15. <sup>1</sup>H NMR spectrum of **5cH**.

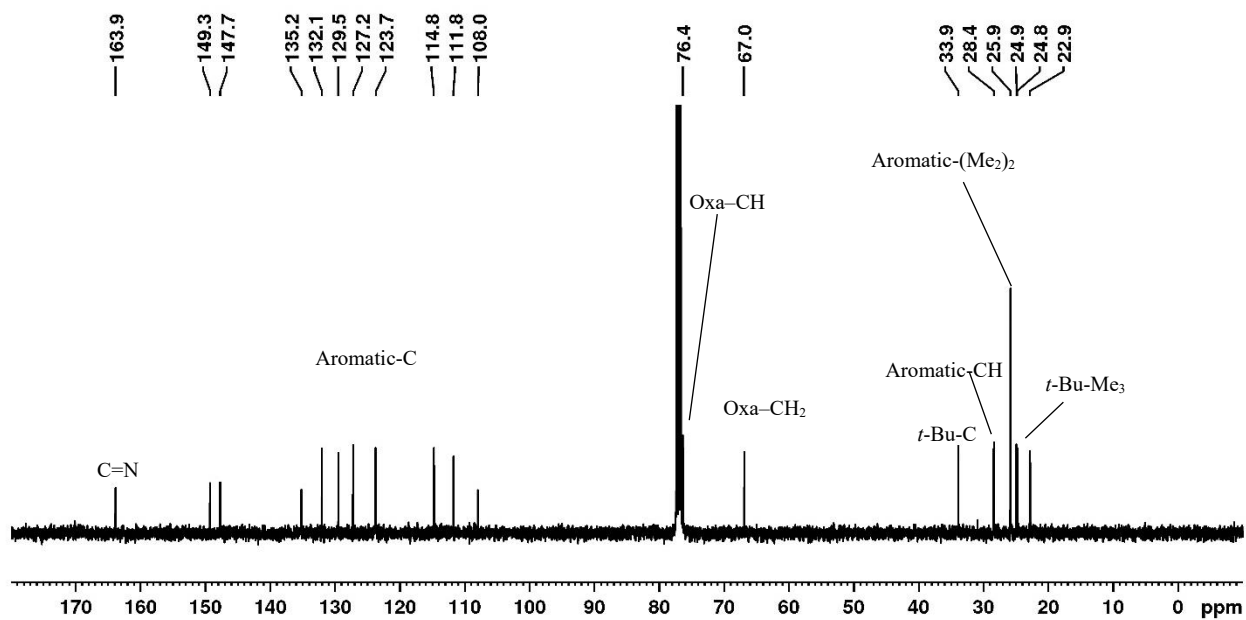

Figure S16. <sup>13</sup>C NMR spectrum of **5cH**.

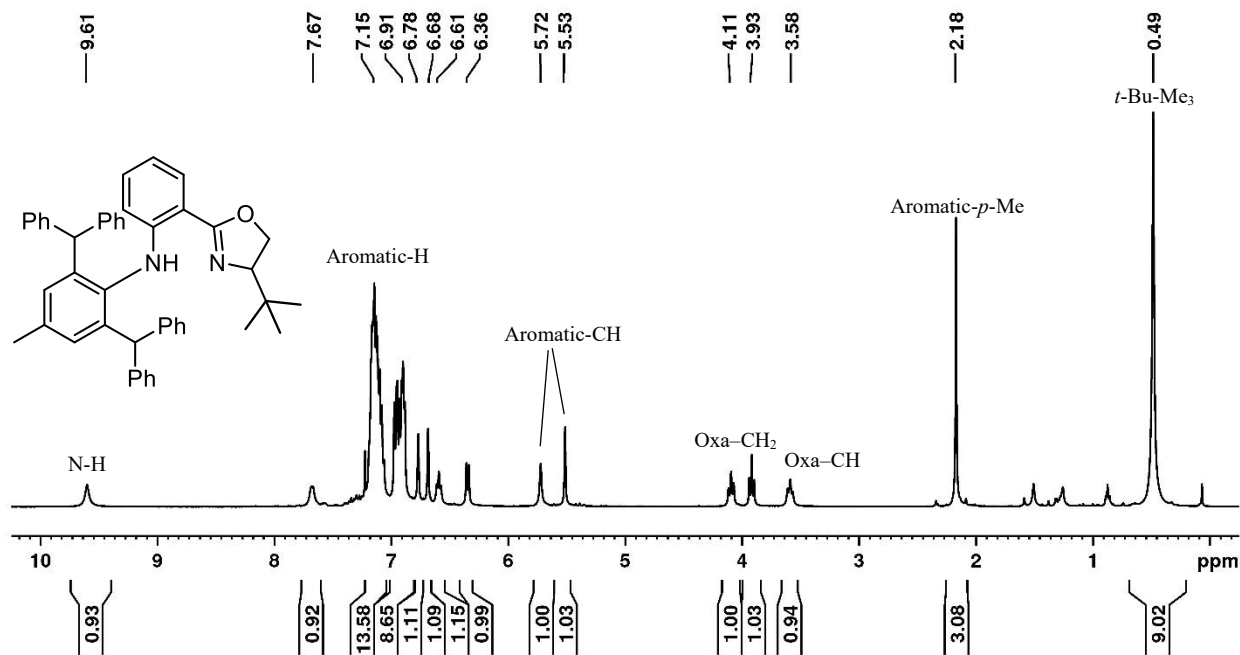

Figure S17.  $^1\text{H}$  NMR spectrum of **5eH**.

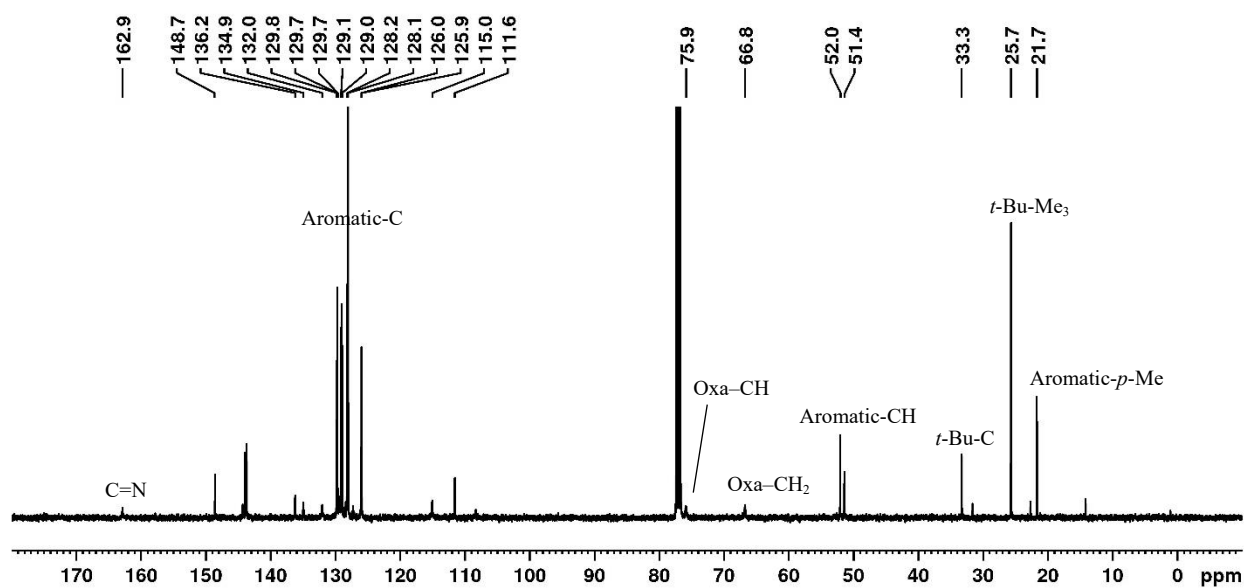

Figure S18.  $^{13}\text{C}$  NMR spectrum of **5eH**.

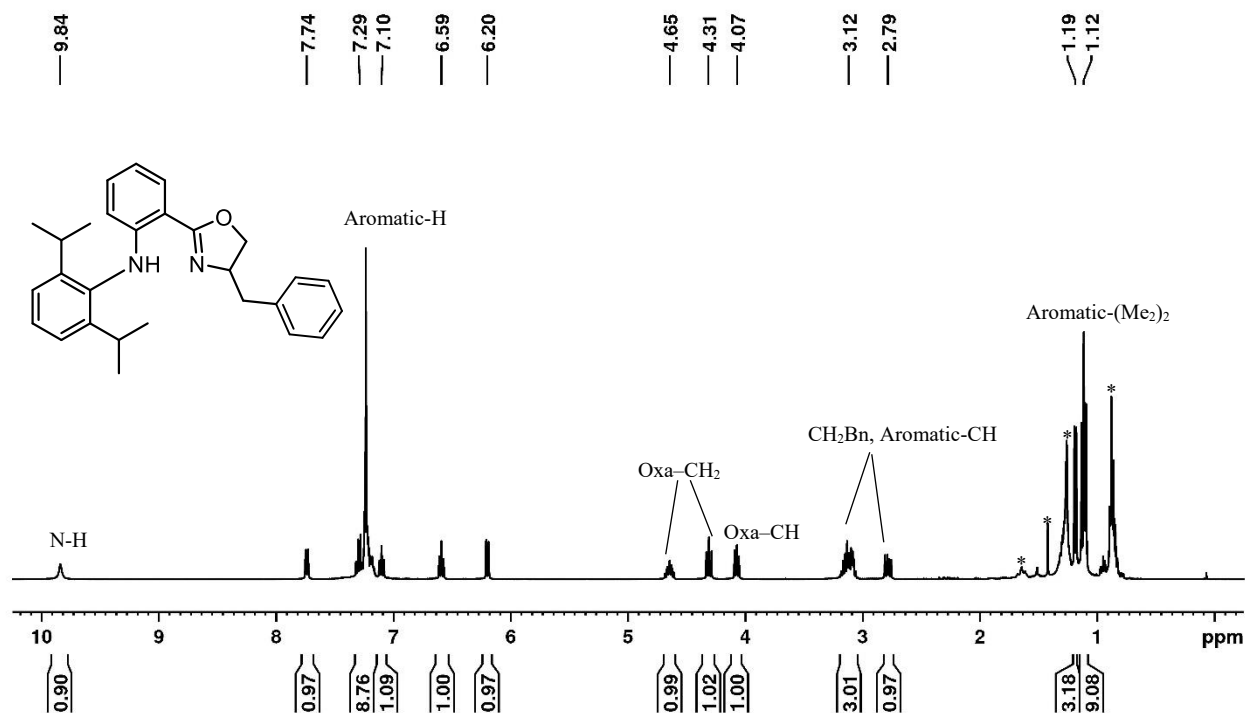

Figure S19. <sup>1</sup>H NMR spectrum of **6cH**. solvent impurities are indicated by \*

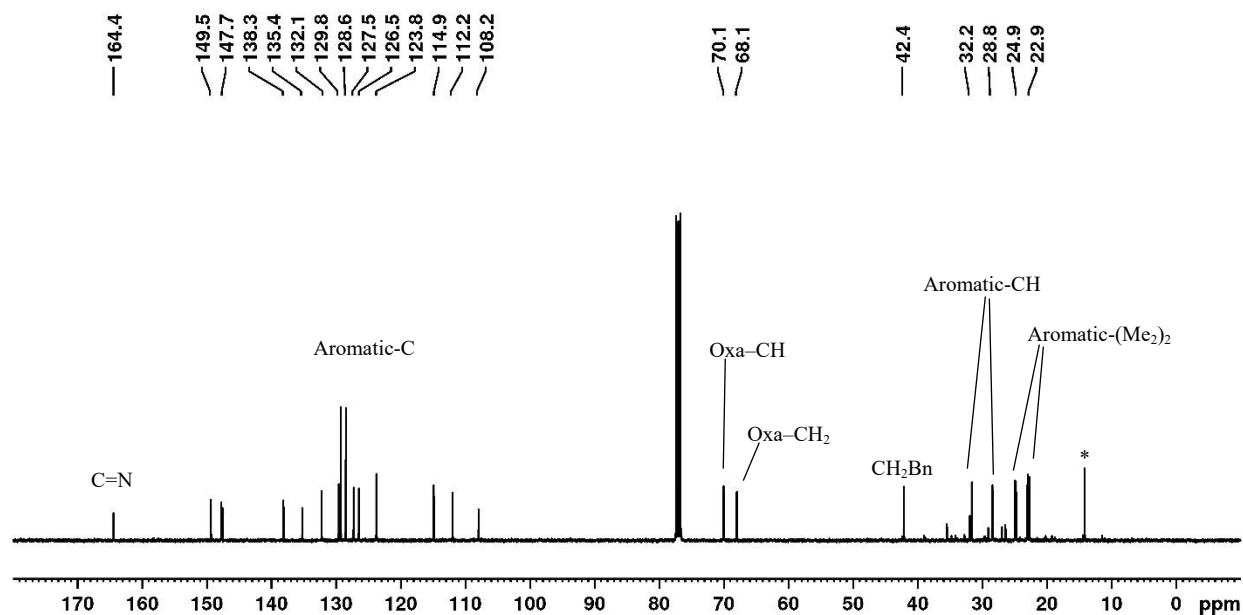

Figure S20. <sup>13</sup>C NMR spectrum of **6cH**. solvent impurities are indicated by \*

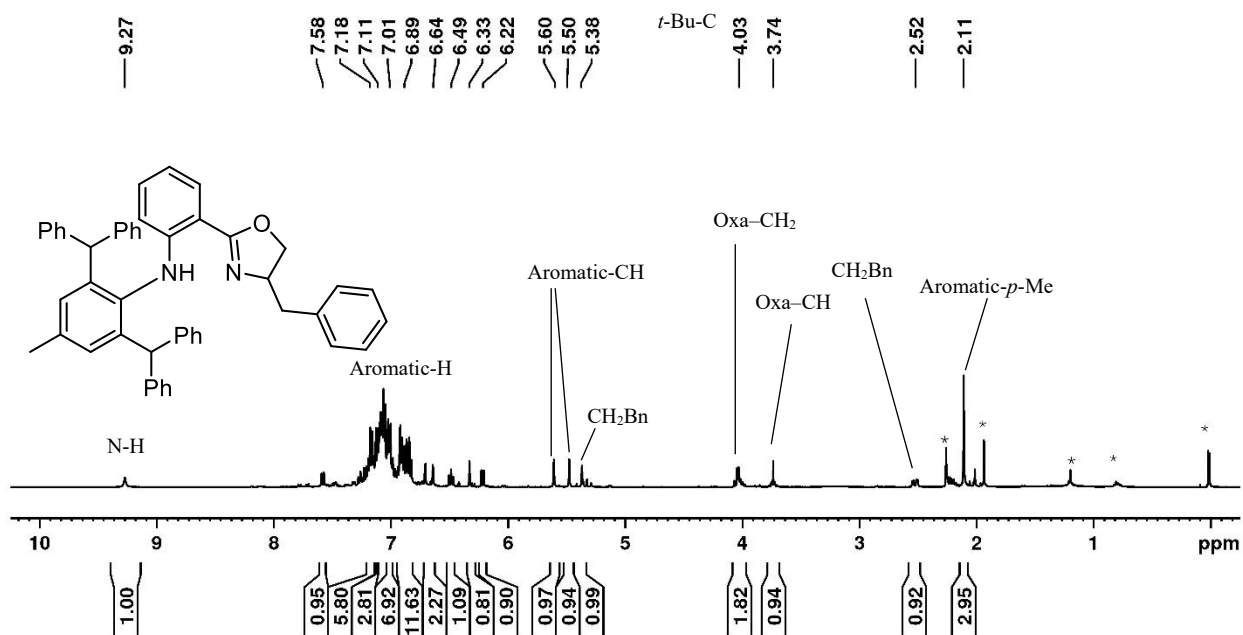

Figure S21.  $^1\text{H}$  NMR spectrum of **6eH**. solvent impurities are indicated by \*

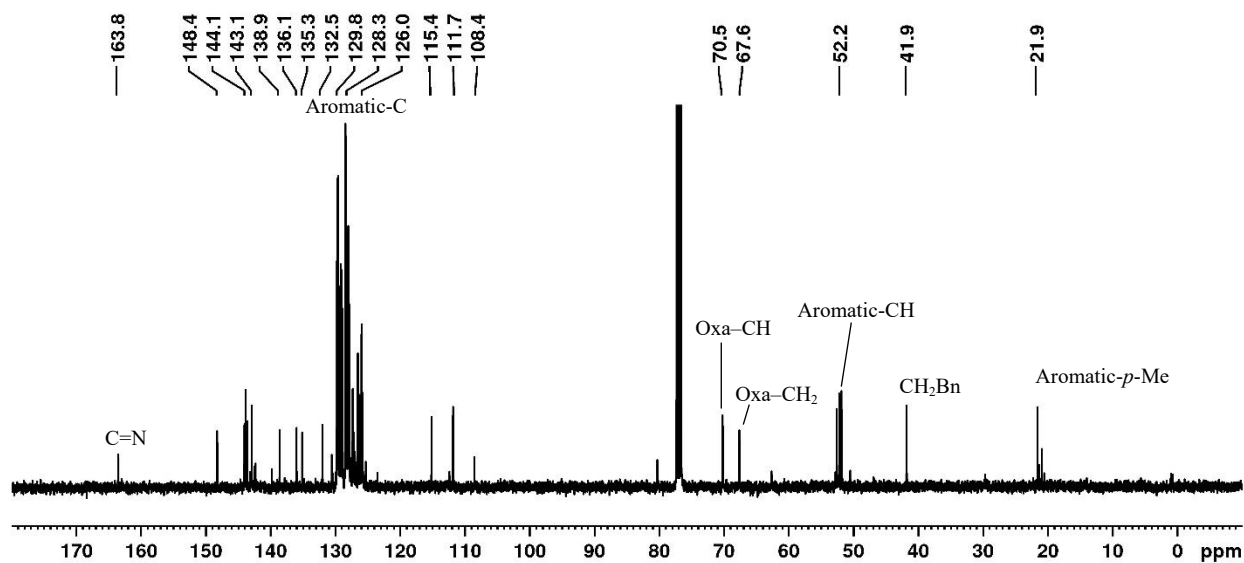

Figure S22.  $^{13}\text{C}$  NMR spectrum of **6eH**.

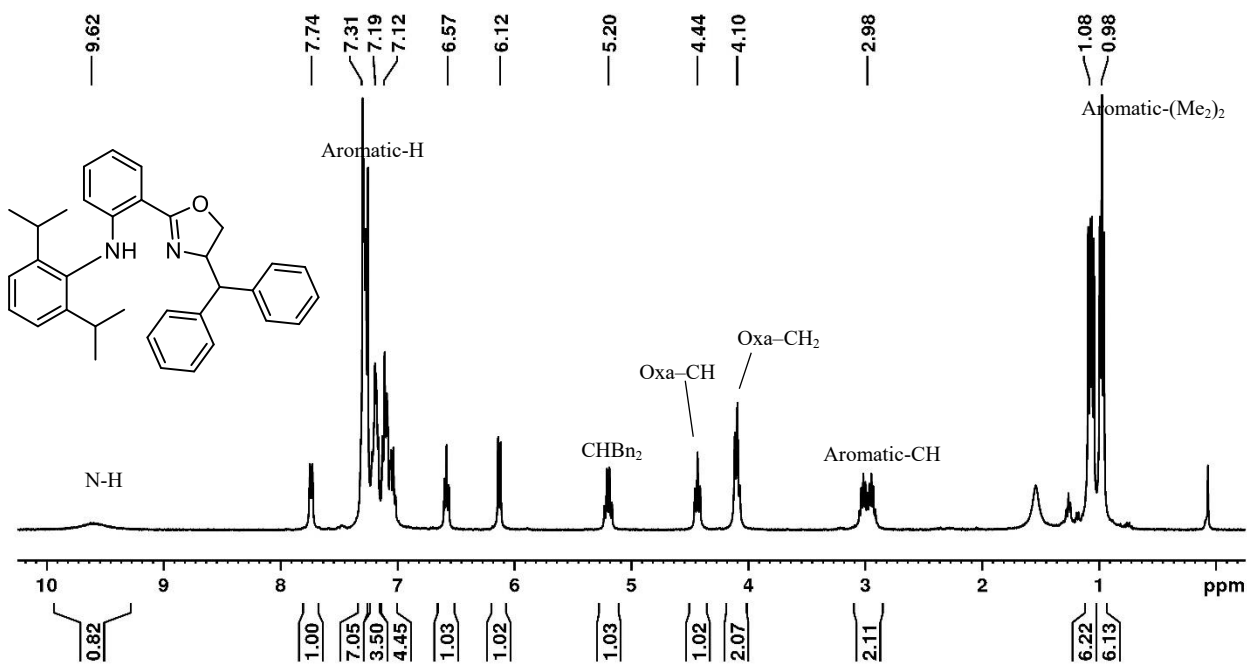

Figure S23.  $^1\text{H}$  NMR spectrum of **7cH**.

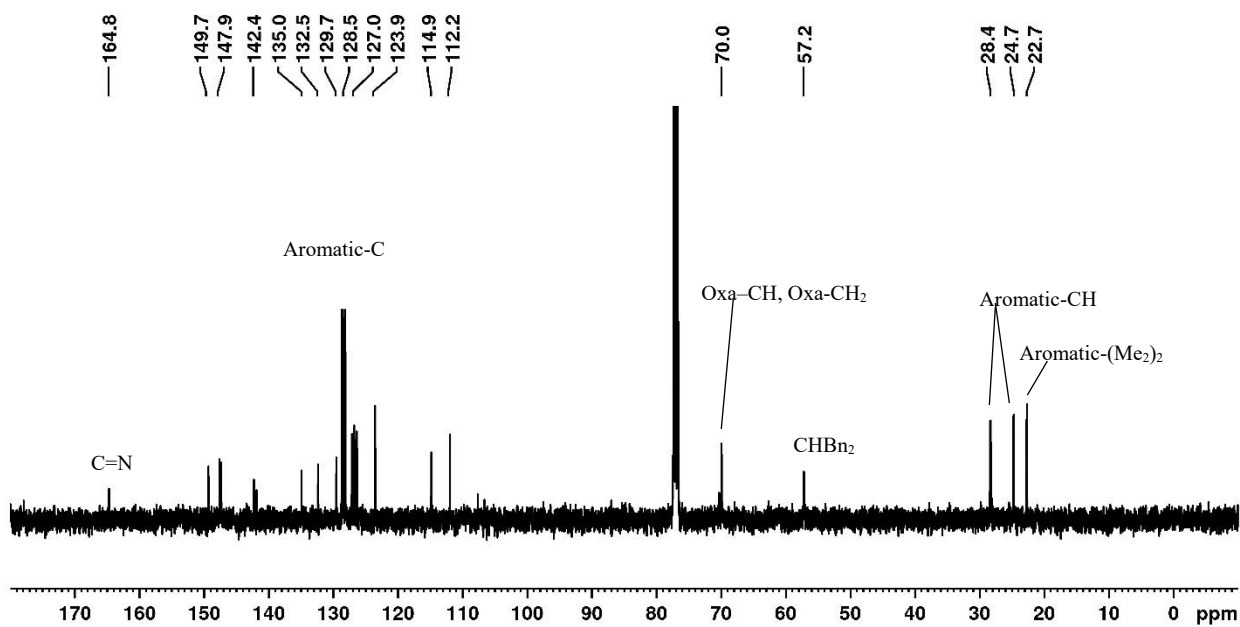

Figure S24.  $^{13}\text{C}$  NMR spectrum of **7cH**.

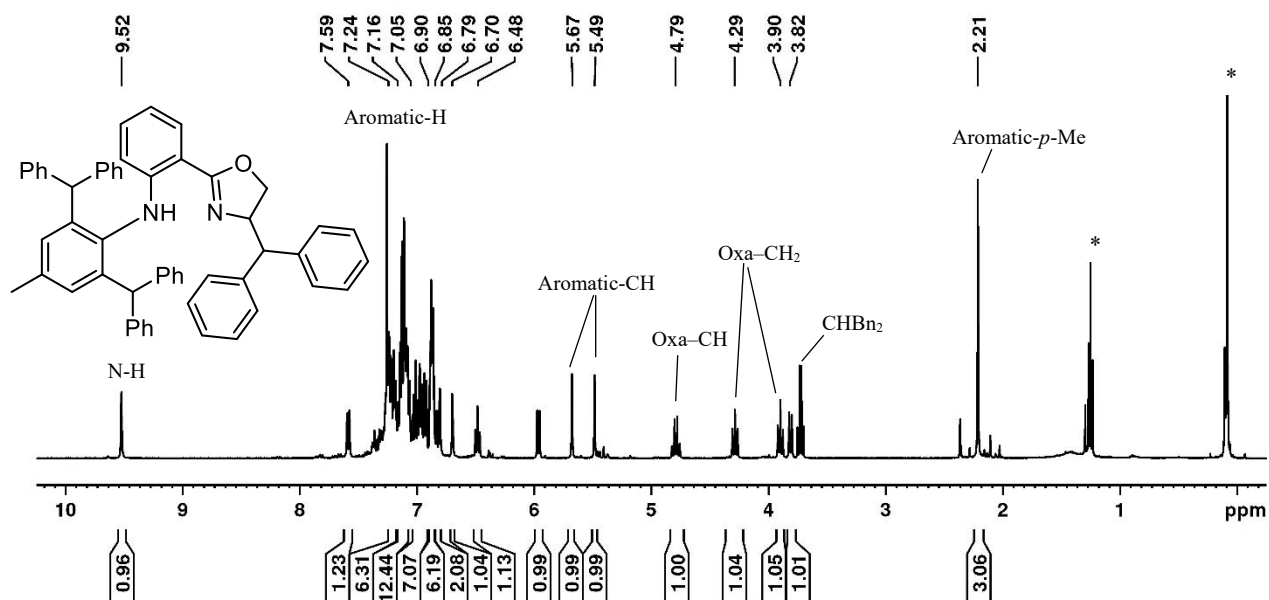

Figure S25. <sup>1</sup>H NMR spectrum of **7eH**. solvent impurities are indicated by \*

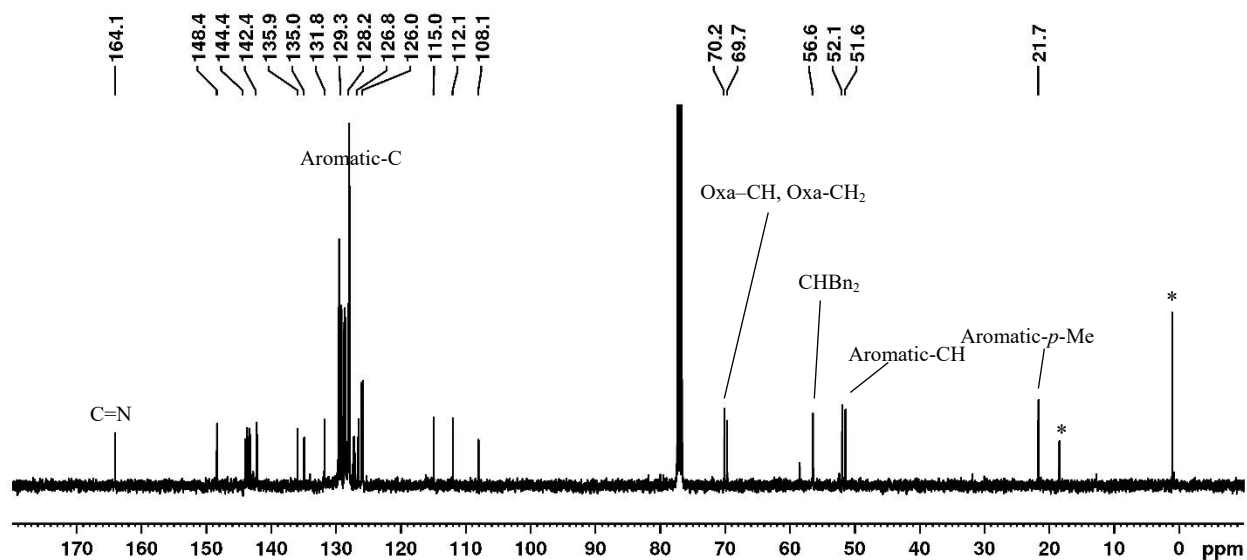

Figure S26. <sup>13</sup>C NMR spectrum of **7eH**.

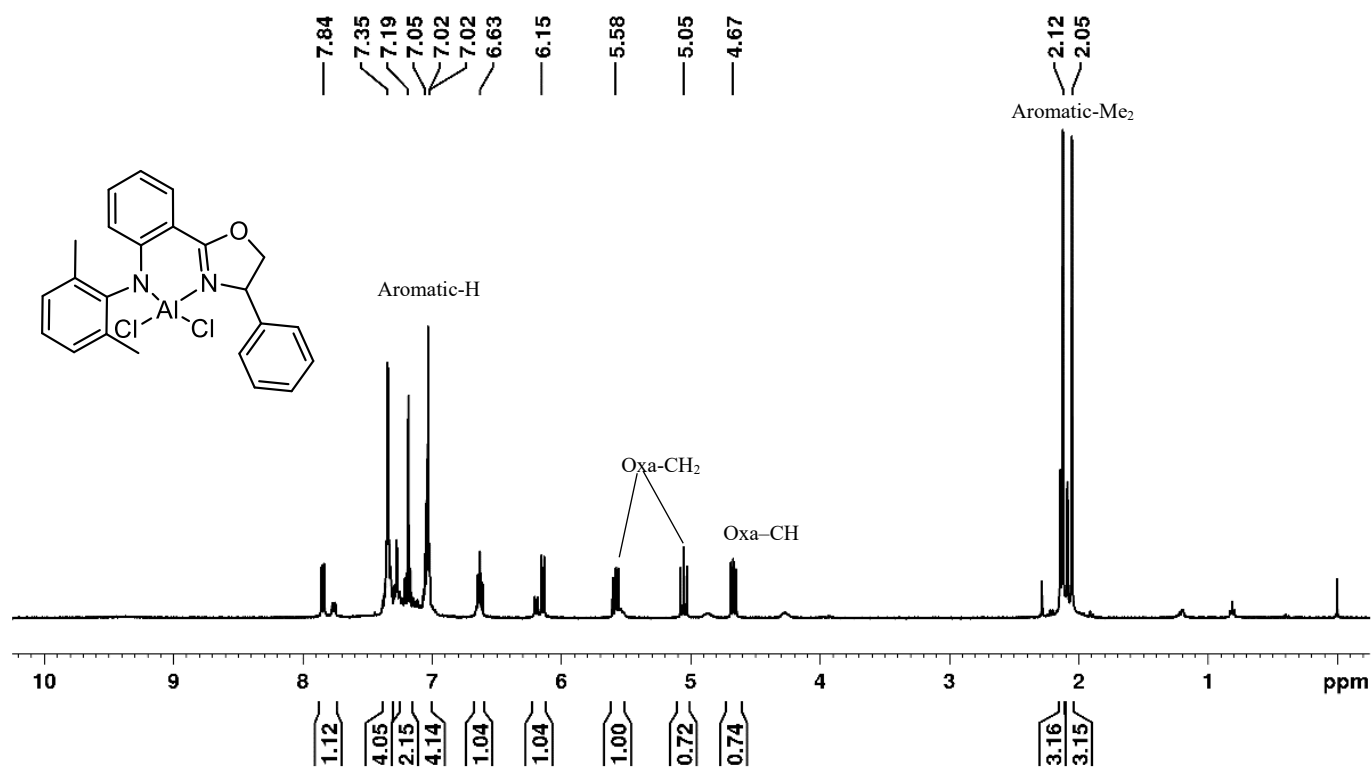

Figure S27.  $^1\text{H}$  NMR spectrum of  $3\text{AlCl}_2$ .

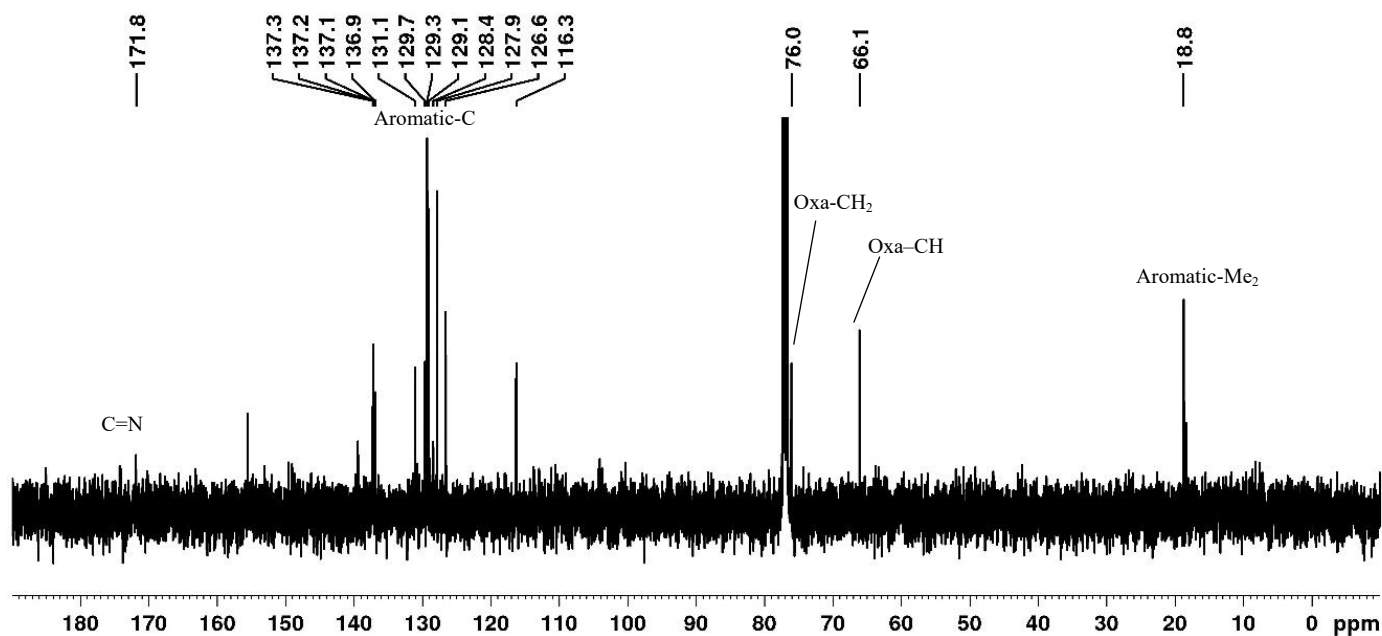

Figure S28.  $^{13}\text{C}$  NMR of  $3\text{AlCl}_2$ .

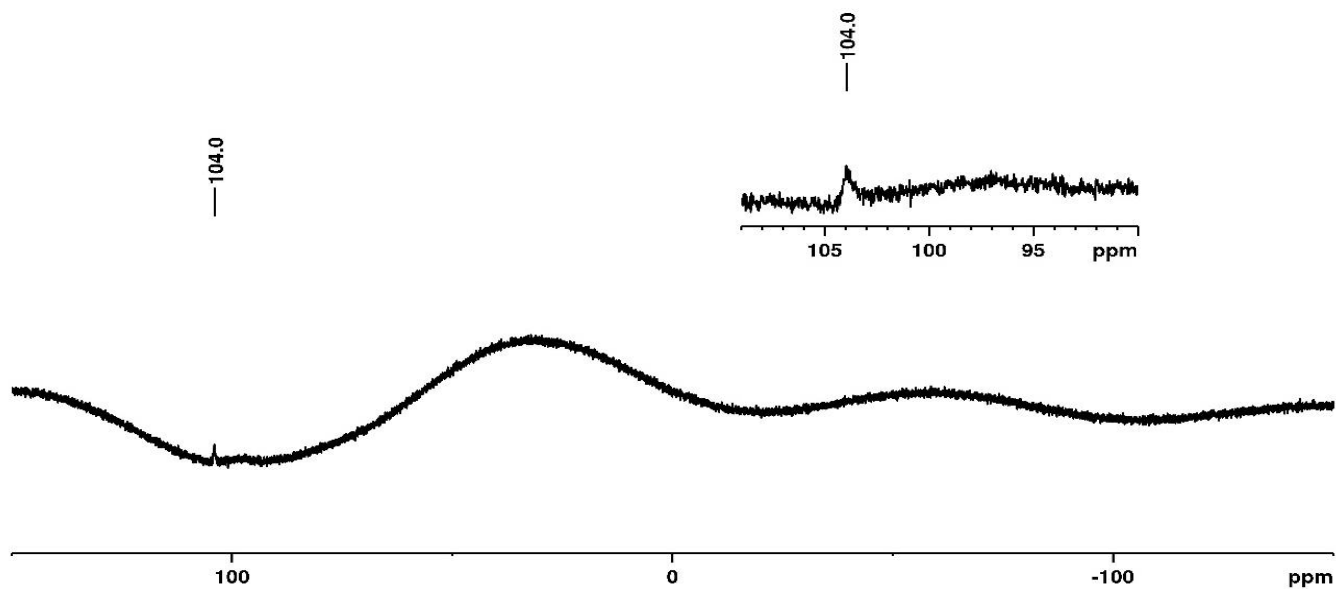

Figure S29.  $^{27}\text{Al}$  NMR spectrum of  $3\text{AlCl}_2$ .

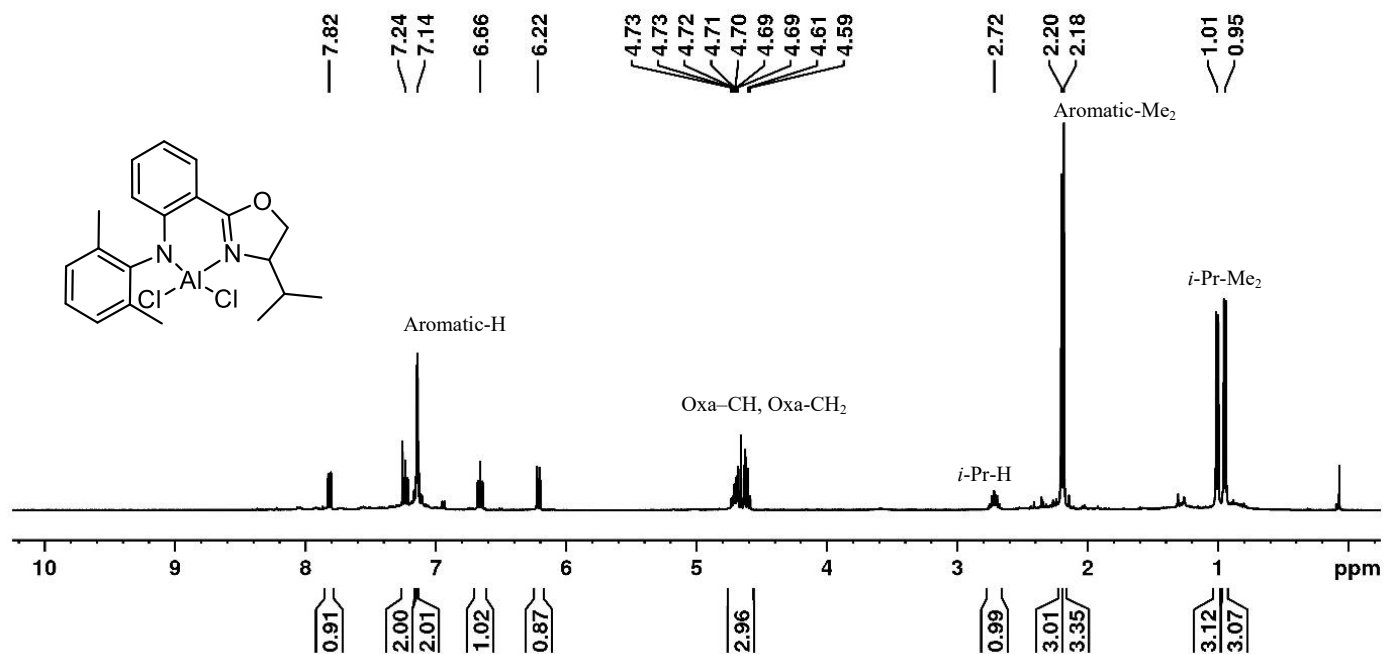

Figure S30.  $^1\text{H}$  NMR spectrum of  $4\text{aAlCl}_2$ .



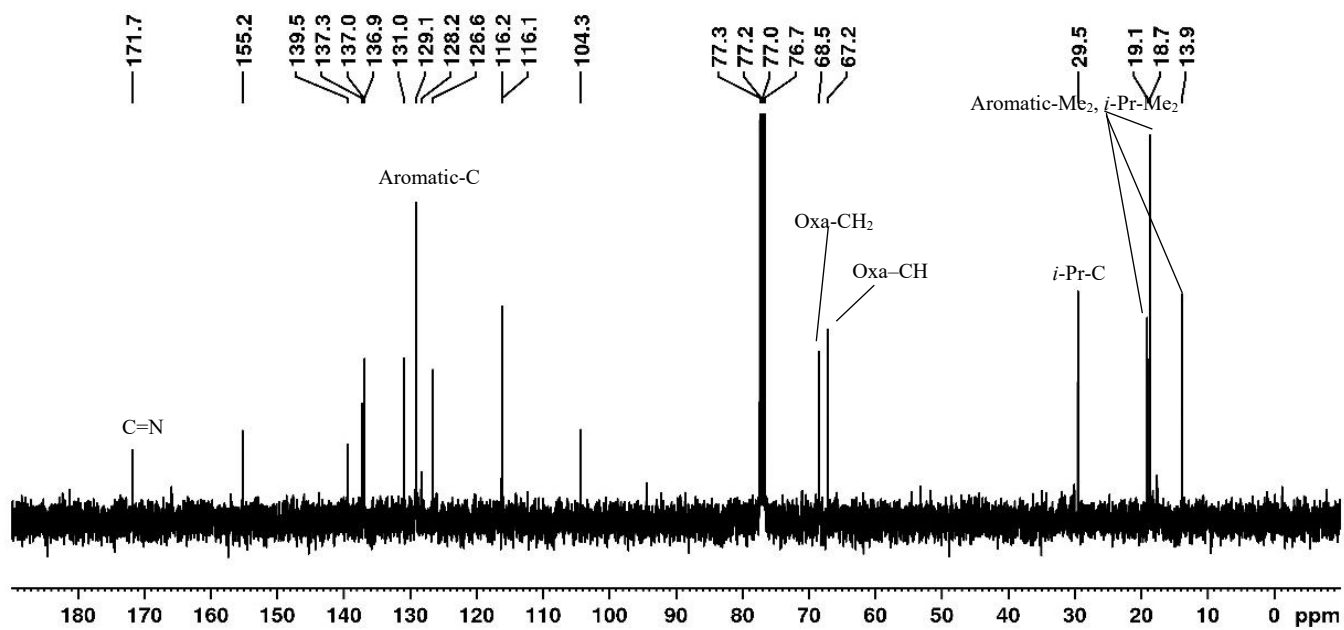

Figure S31.  $^{13}\text{C}$  NMR spectrum of **4aAlCl<sub>2</sub>**.

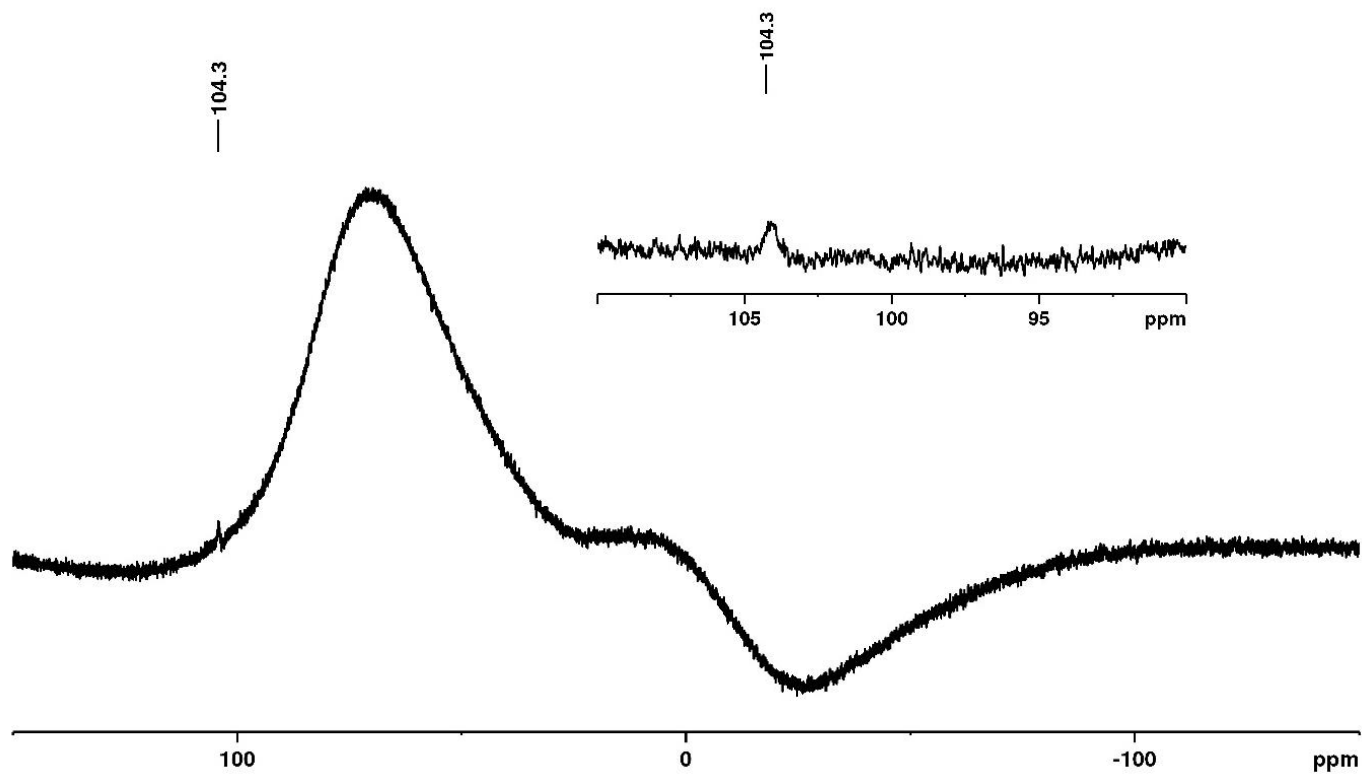

Figure S32.  $^{27}\text{Al}$  NMR spectrum of **4aAlCl<sub>2</sub>**.

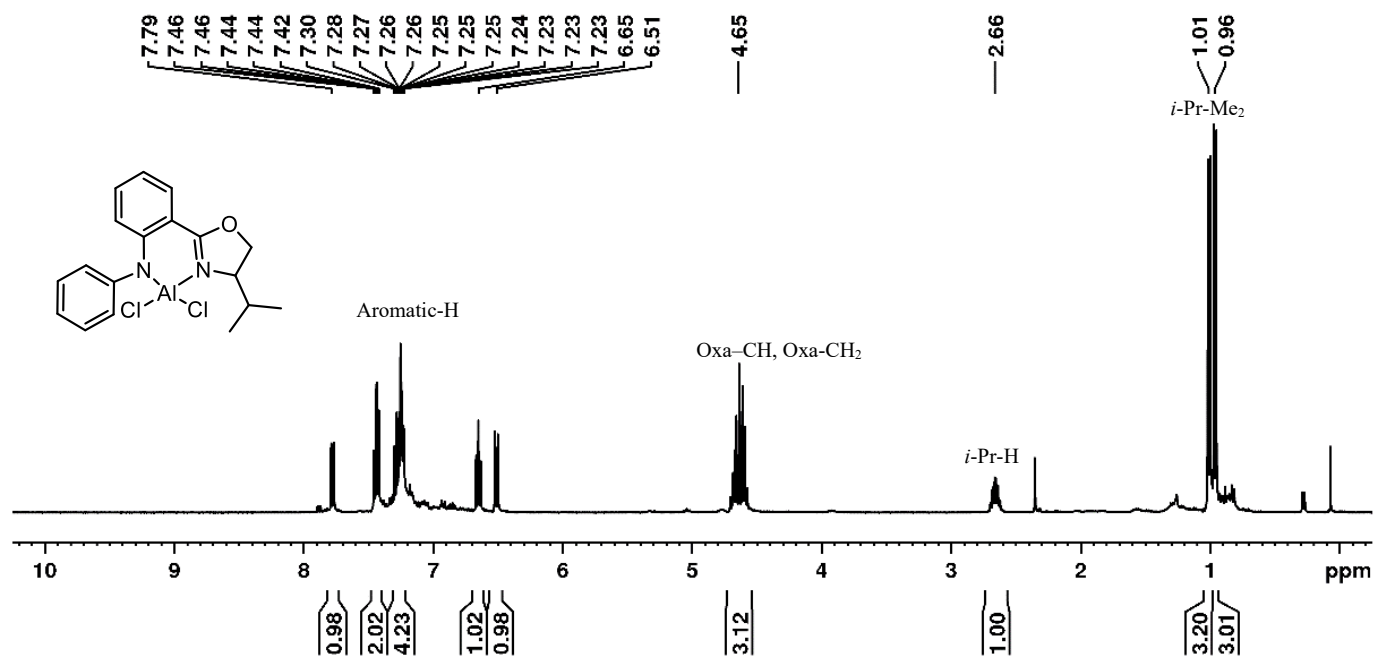

Figure S33. <sup>1</sup>H NMR spectrum of **4bAlCl<sub>2</sub>**.

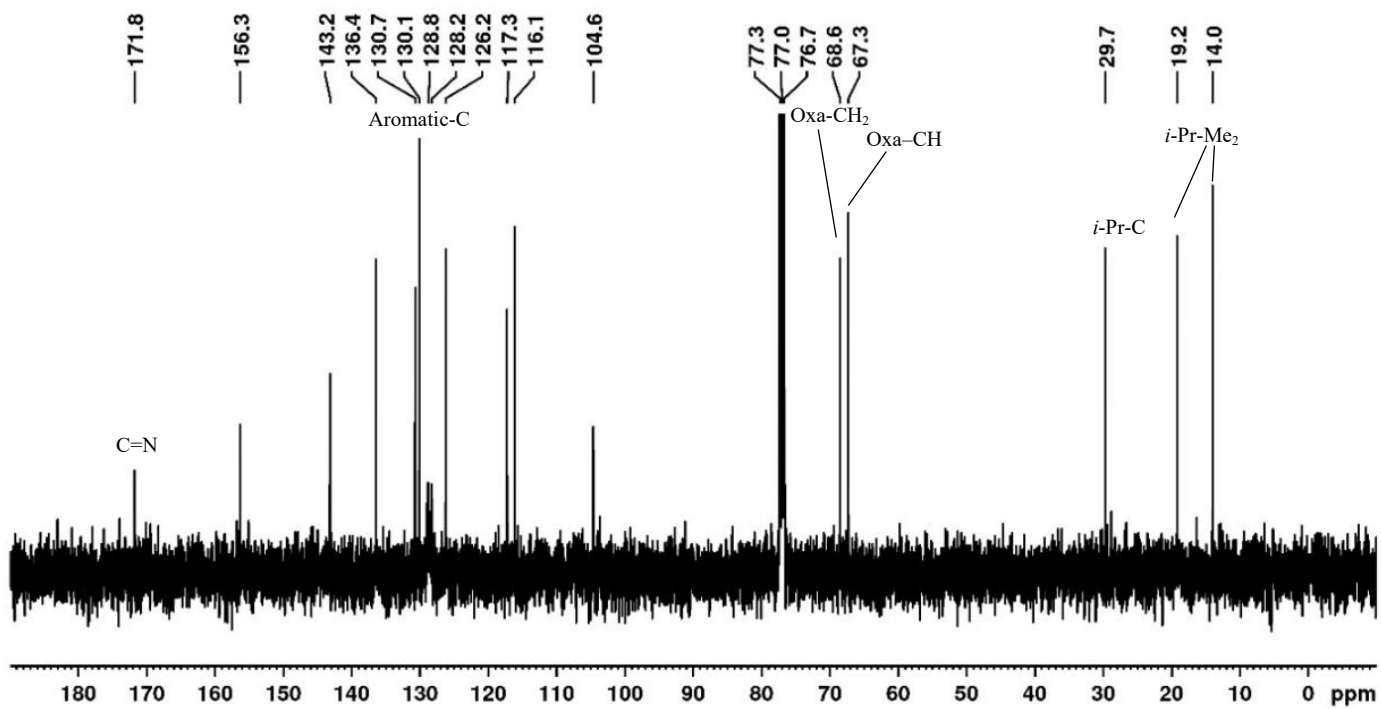

Figure S34. <sup>13</sup>C NMR spectrum of **4bAlCl<sub>2</sub>**.

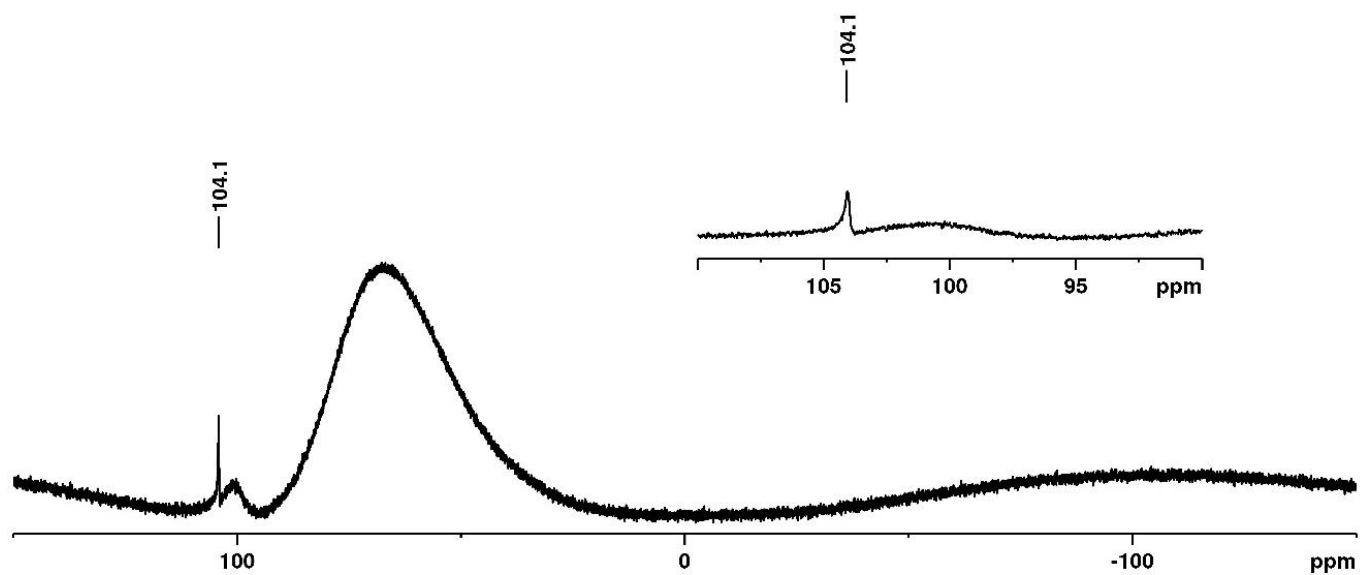

Figure S35.  $^{27}\text{Al}$  NMR spectrum of  $4\text{bAlCl}_2$ .

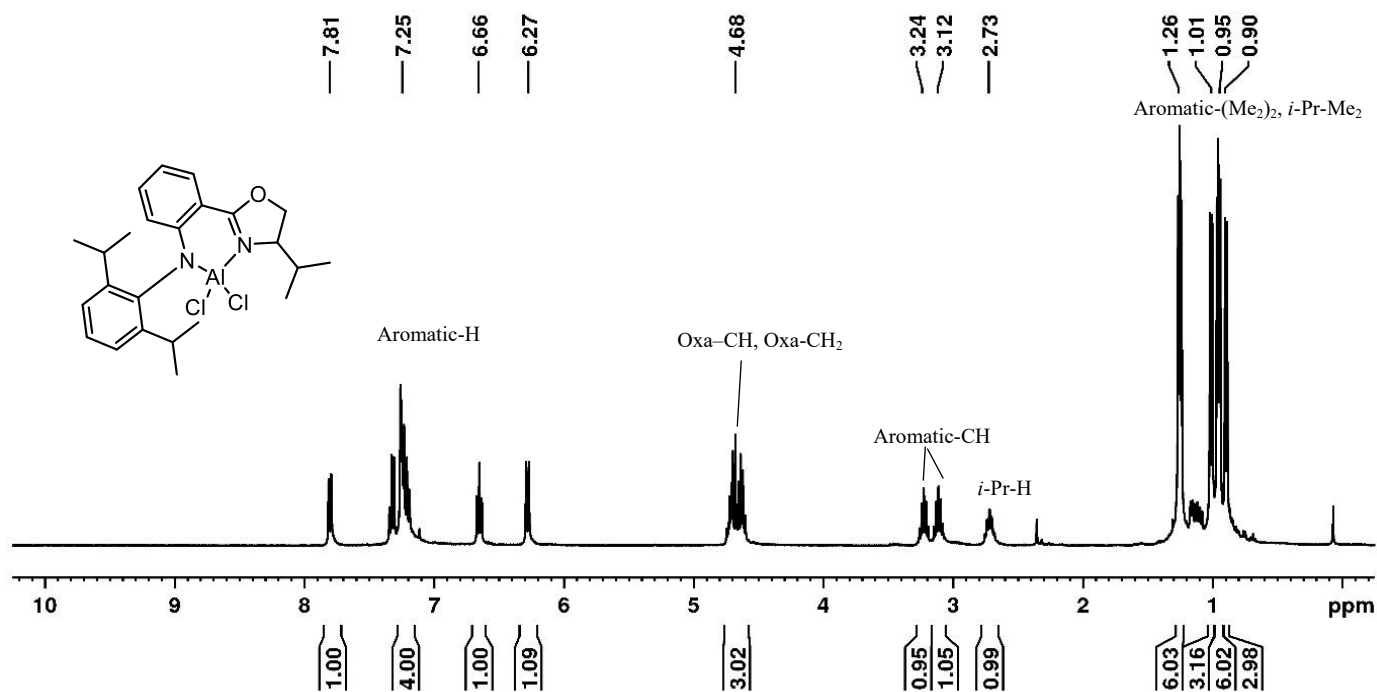

Figure S36.  $^1\text{H}$  NMR spectrum of  $4\text{cAlCl}_2$ .

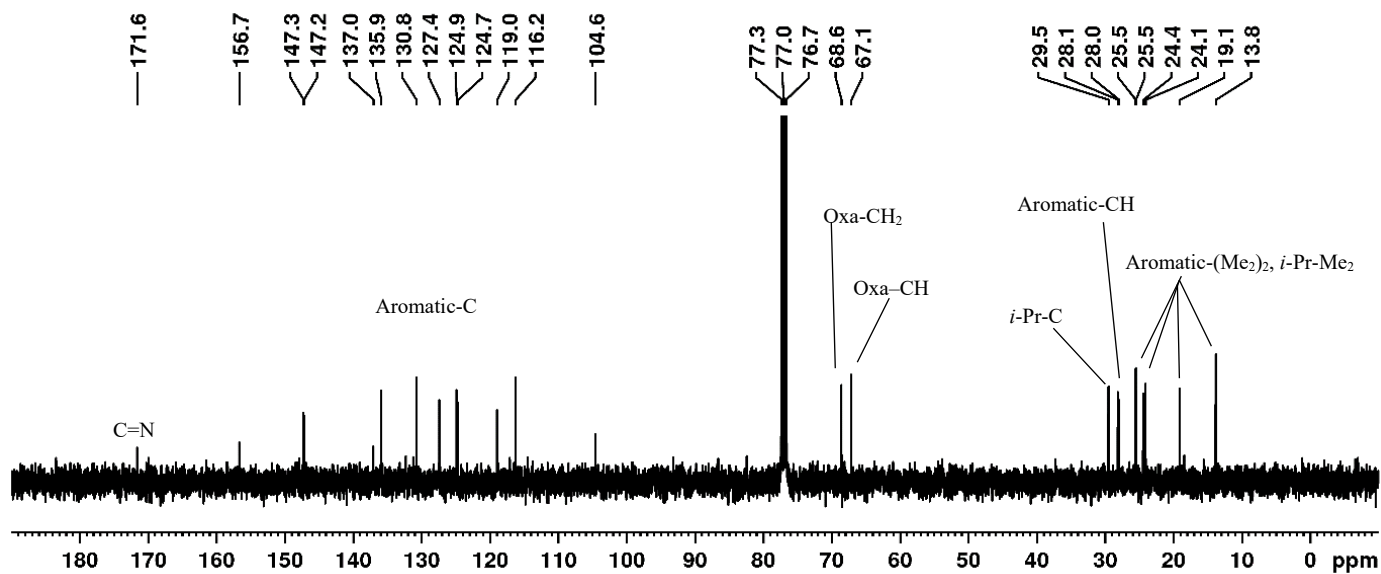

Figure S37. <sup>13</sup>C NMR spectrum of **4cAlCl<sub>2</sub>**.

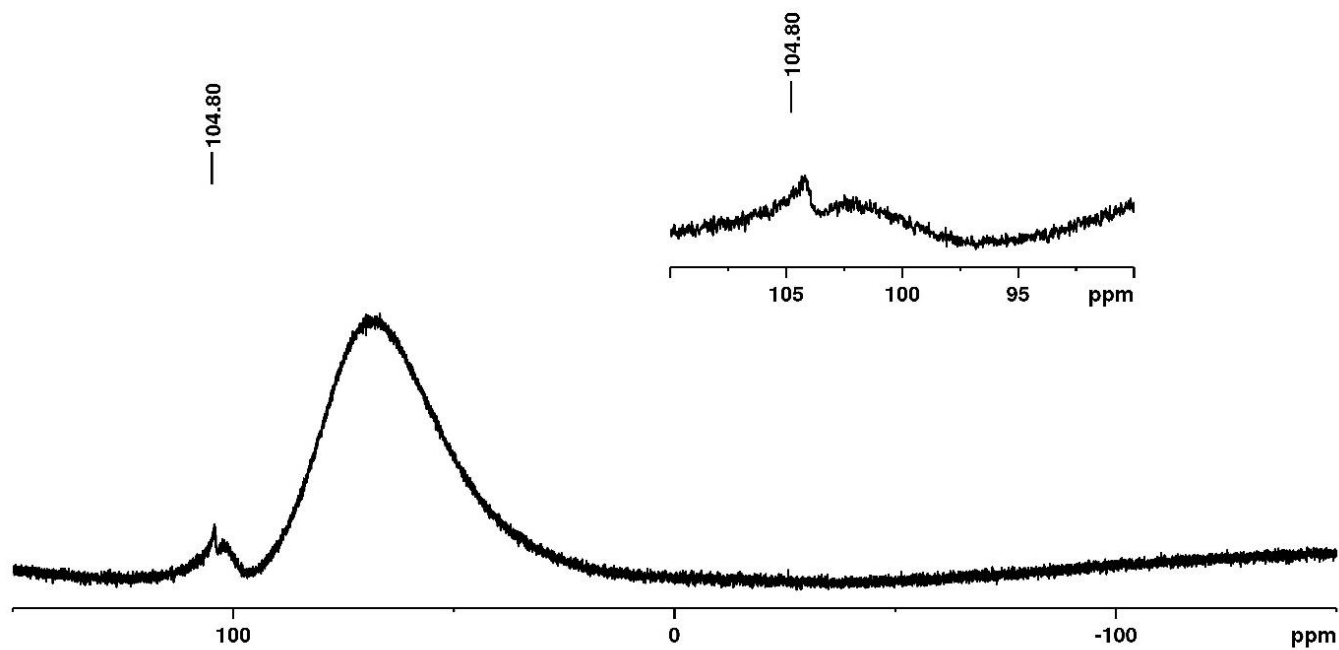

Figure S38. <sup>27</sup>Al NMR spectrum of **4cAlCl<sub>2</sub>**.

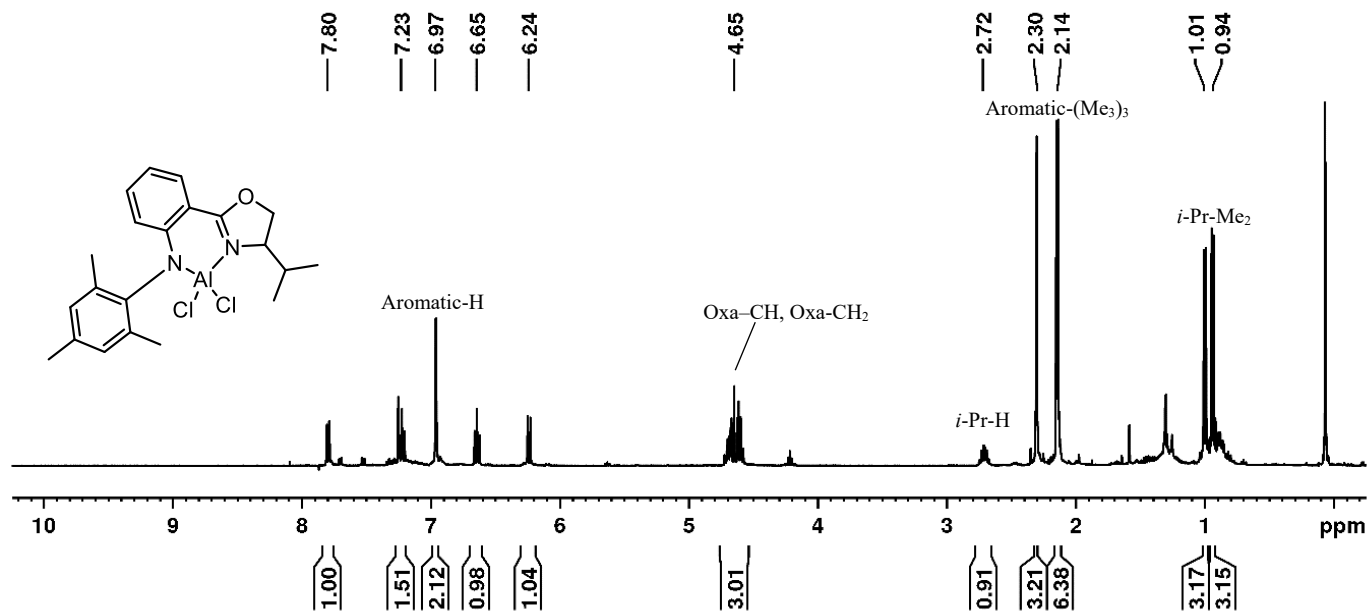

Figure S39. <sup>1</sup>H NMR spectrum of 4dAlCl<sub>2</sub>.

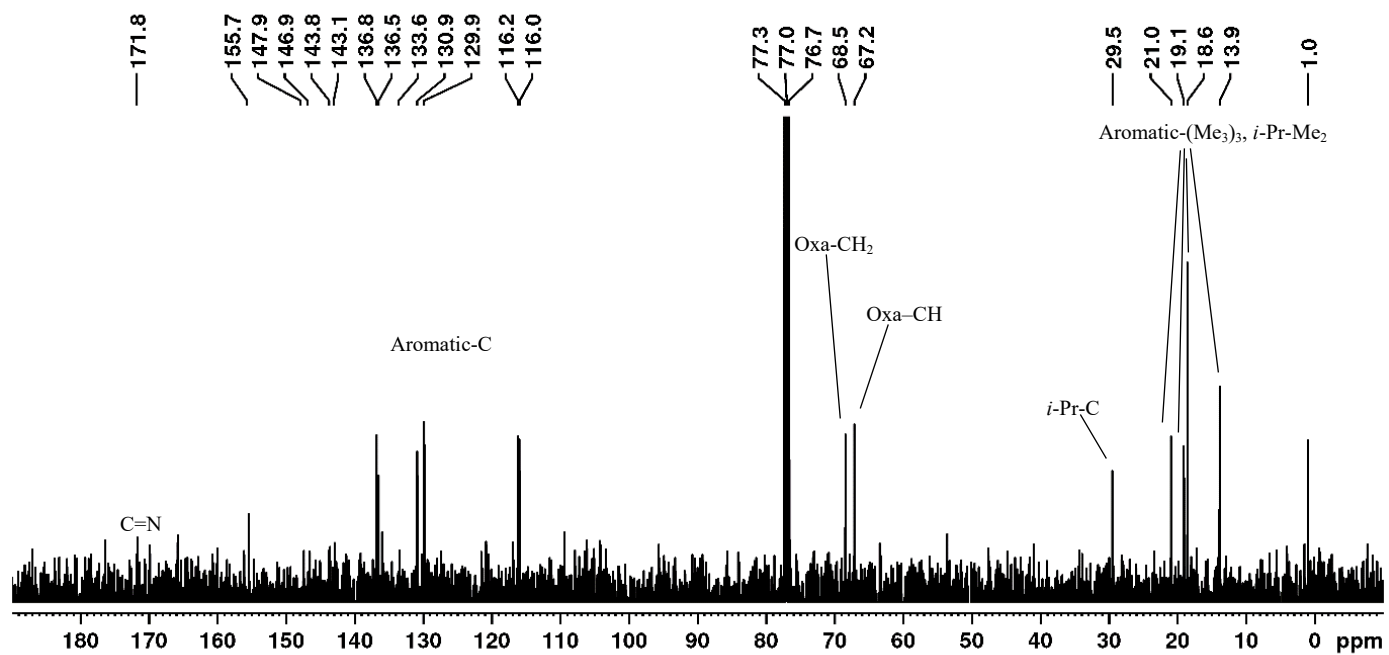

Figure S40. <sup>13</sup>C NMR spectrum of 4dAlCl<sub>2</sub>.

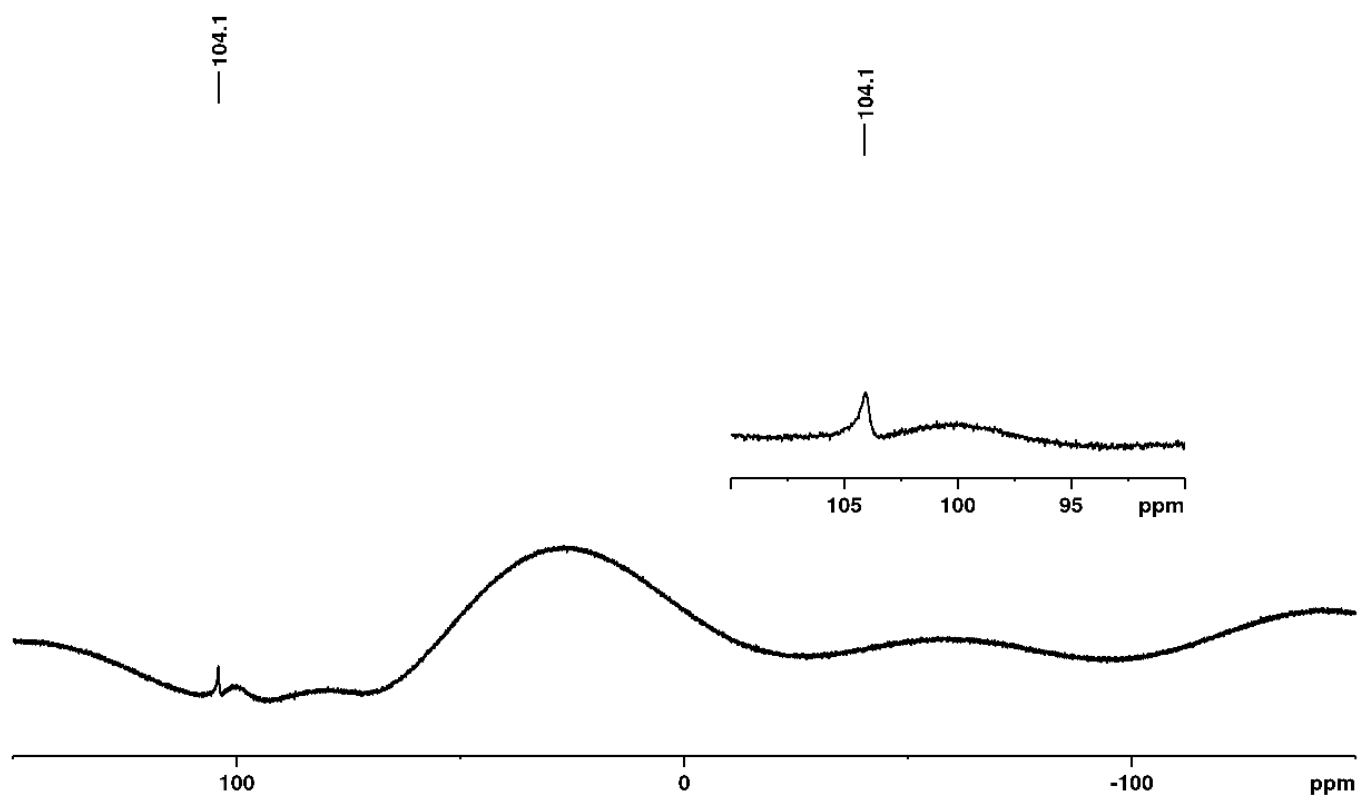

Figure S41.  $^{27}\text{Al}$  NMR spectrum of  $4\text{dAlCl}_2$ .

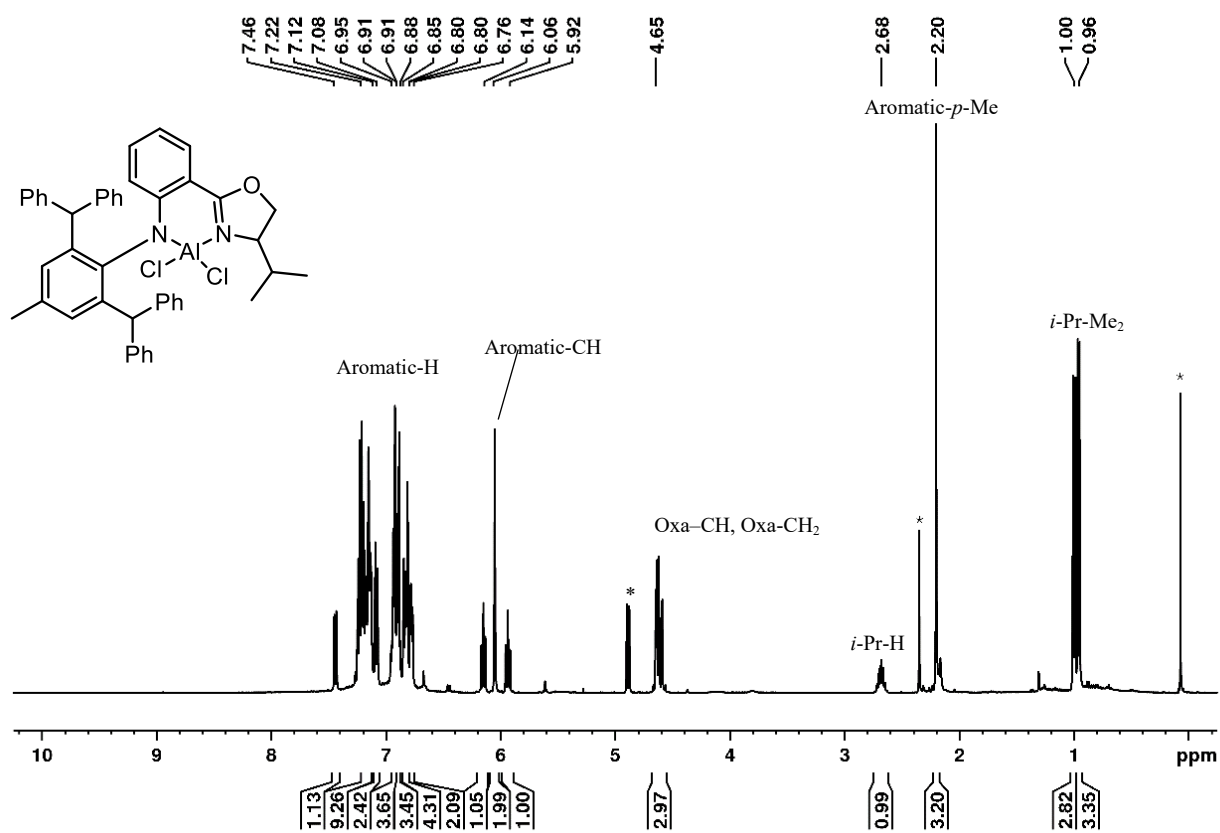

Figure S42.  $^1\text{H}$  NMR spectrum of  $4\text{eAlCl}_2$ . Note: solvent impurities are indicated by \*

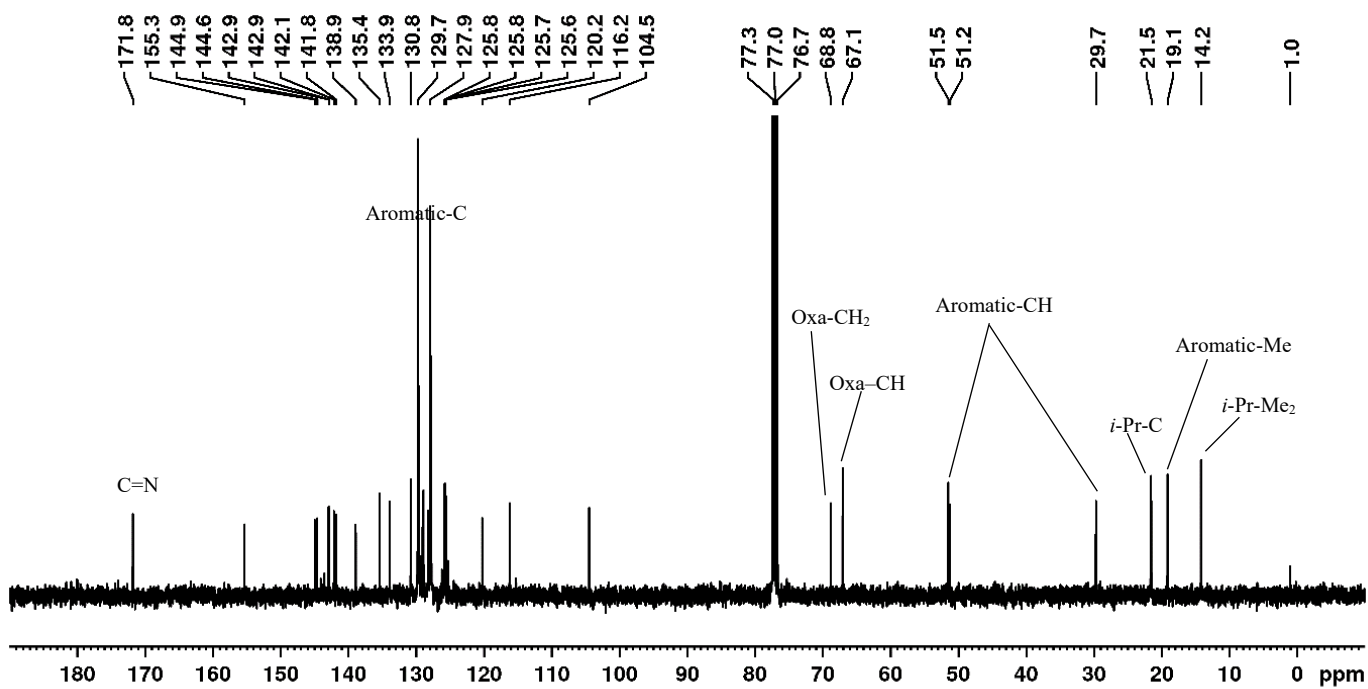

Figure S43. <sup>13</sup>C NMR spectrum of **4eAlCl<sub>2</sub>**.

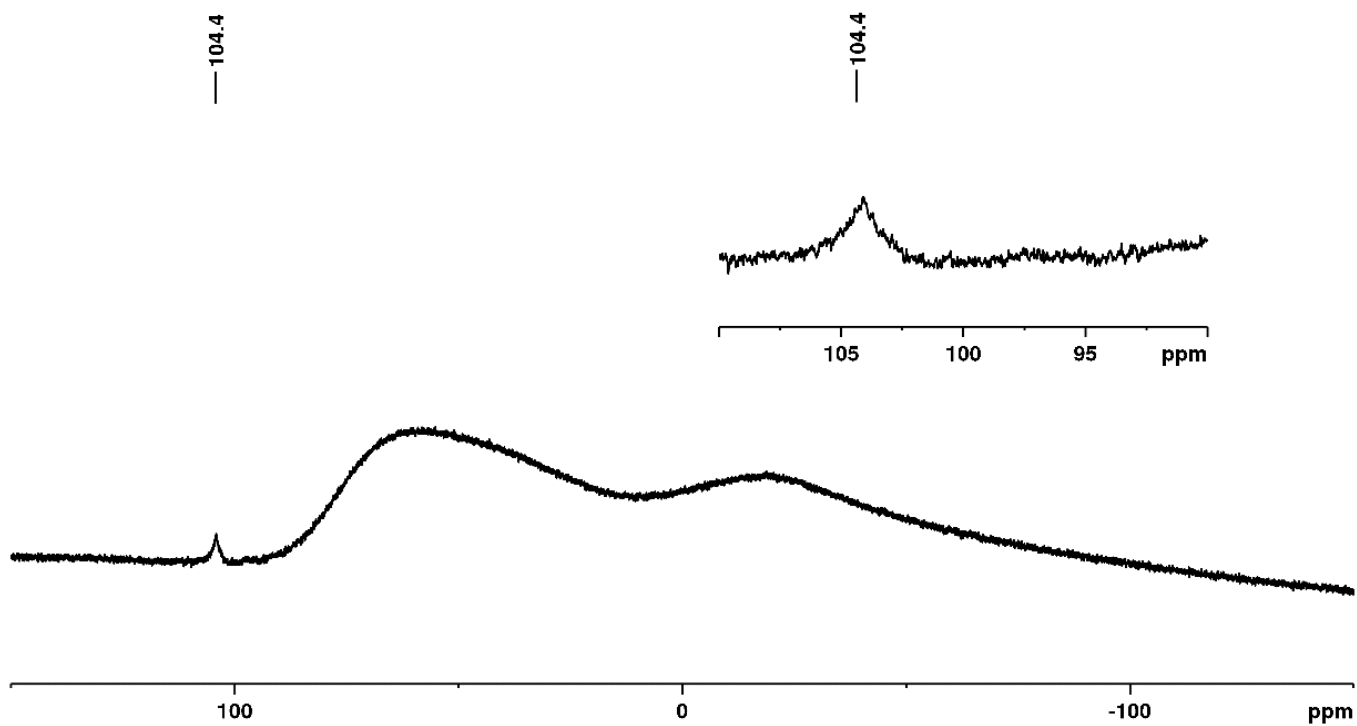

Figure S44. <sup>27</sup>Al NMR spectrum of **4eAlCl<sub>2</sub>**.

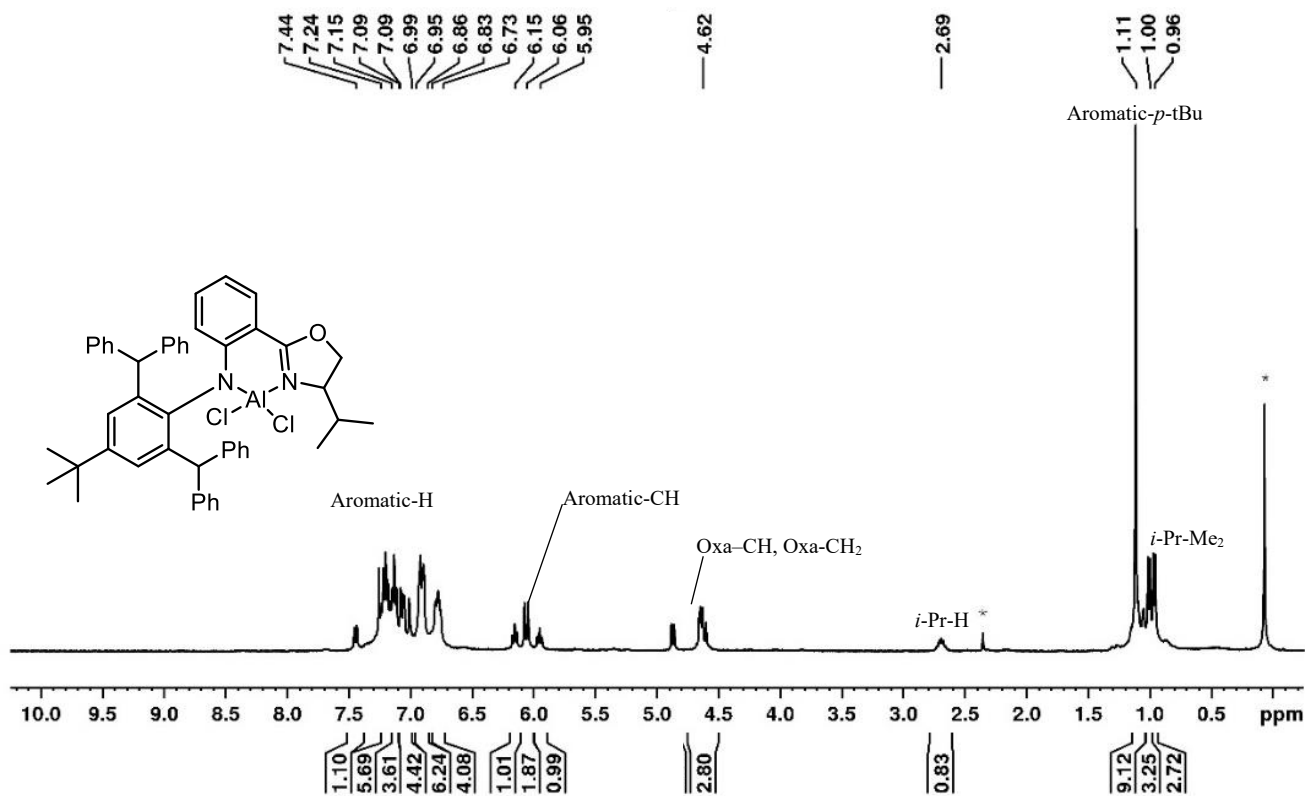

Figure S45. <sup>1</sup>H NMR spectrum of **4fAlCl<sub>2</sub>**. Note: solvent impurities are indicated by \*

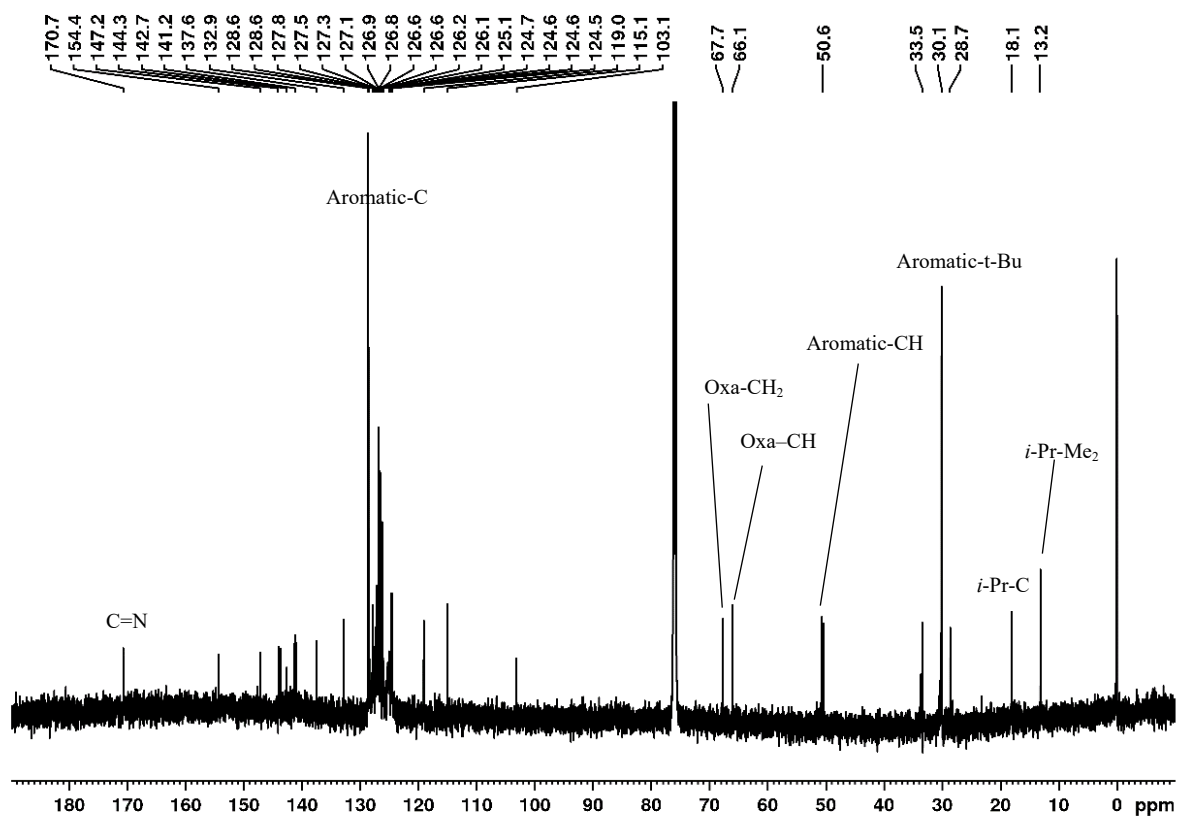

S46. <sup>13</sup>C NMR spectrum of **4fAlCl<sub>2</sub>**.

Figure



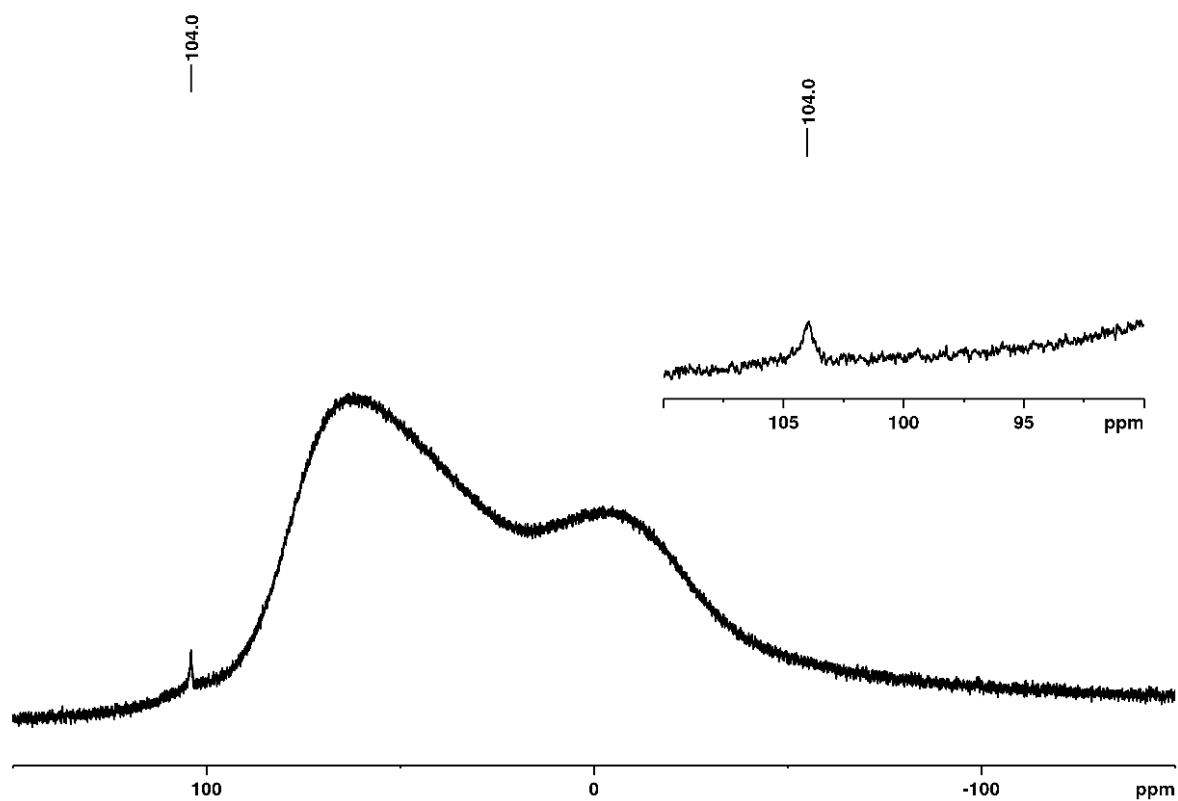

Figure S47.  $^{27}\text{Al}$  NMR spectrum of  $4\text{fAlCl}_2$ .

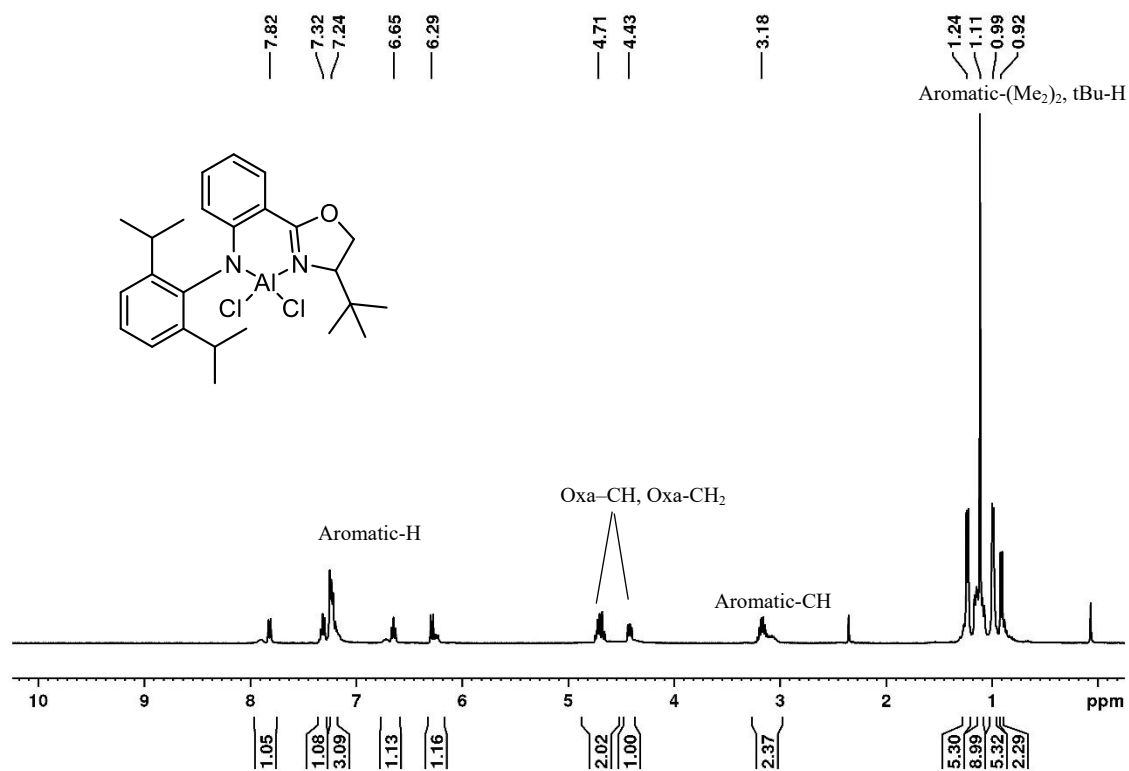

Figure S48.  $^1\text{H}$  NMR spectrum of  $5\text{cAlCl}_2$ .

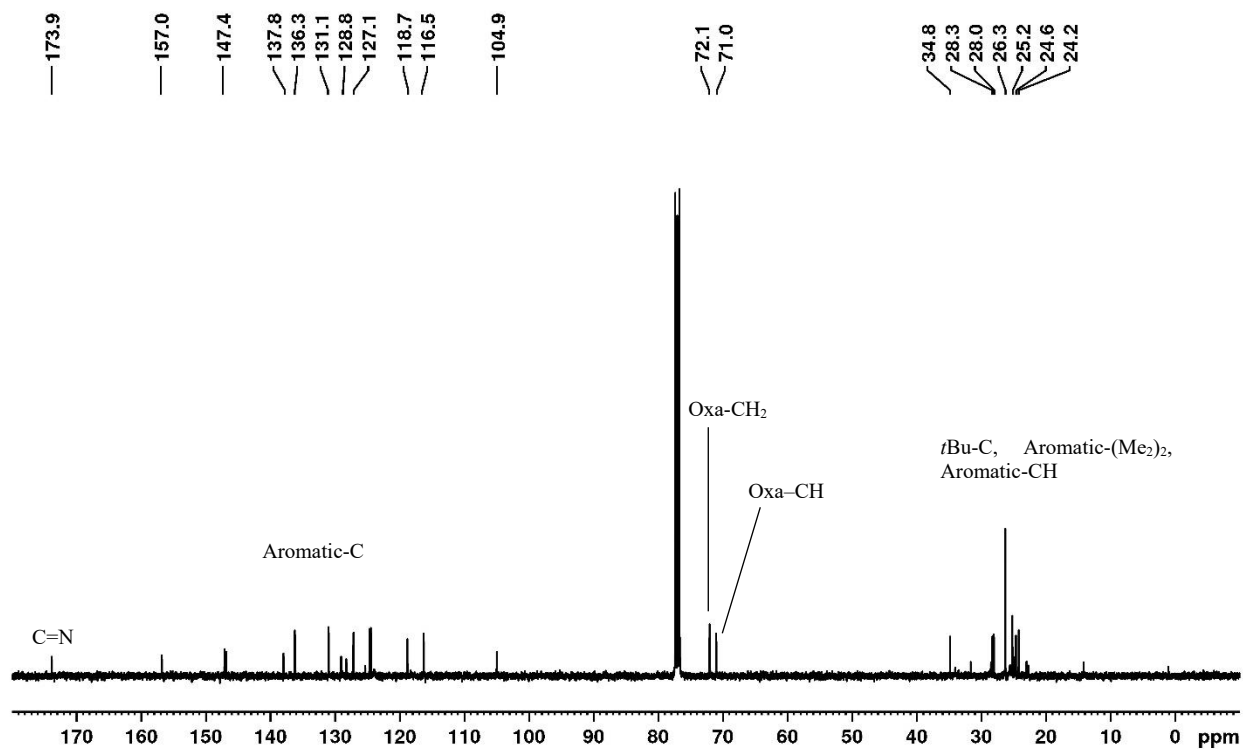

Figure S49.  $^{13}\text{C}$  NMR spectrum of **5cAlCl<sub>2</sub>**.

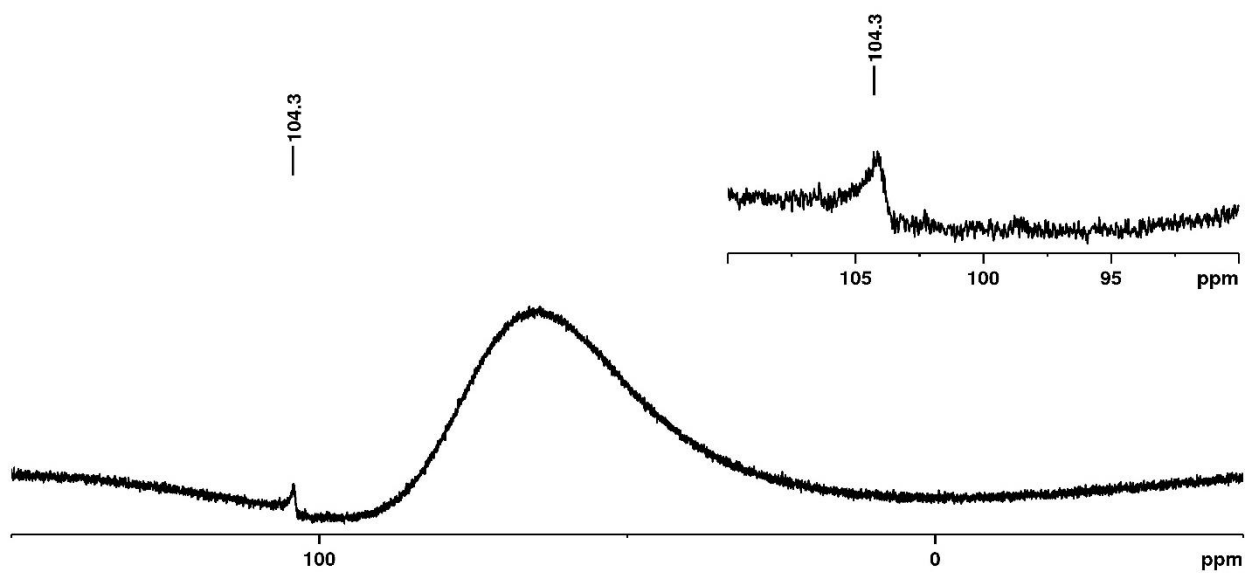

Figure S50.  $^{27}\text{Al}$  NMR spectrum of **5cAlCl<sub>2</sub>**.

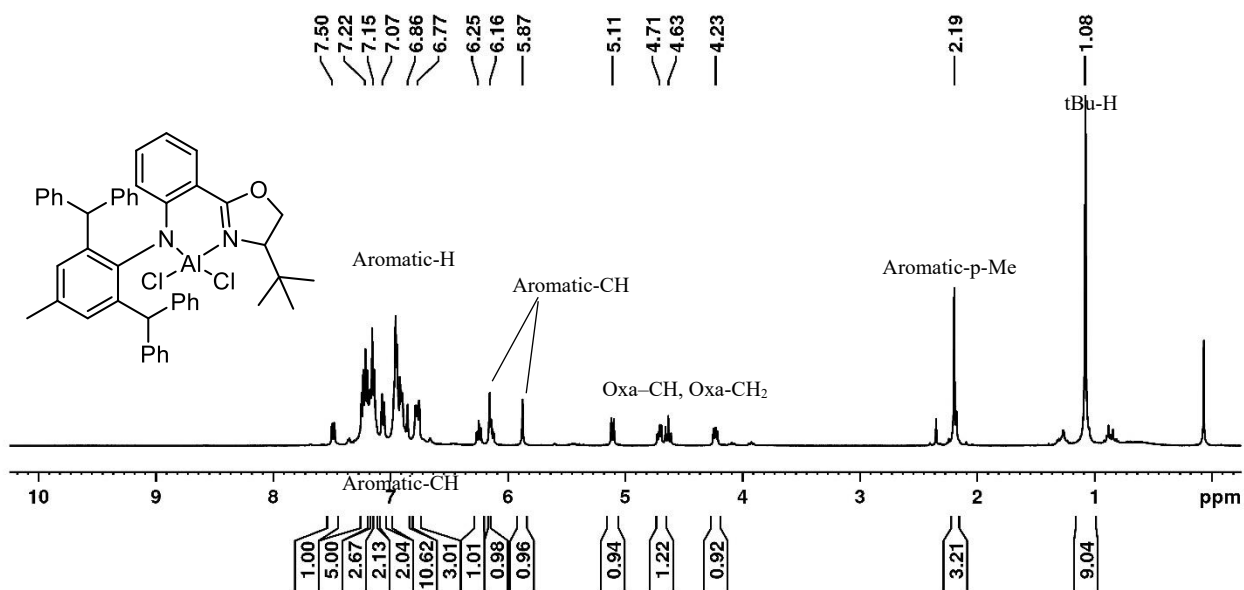

Figure S51.  $^1\text{H}$  NMR spectrum of **5eAlCl<sub>2</sub>**.

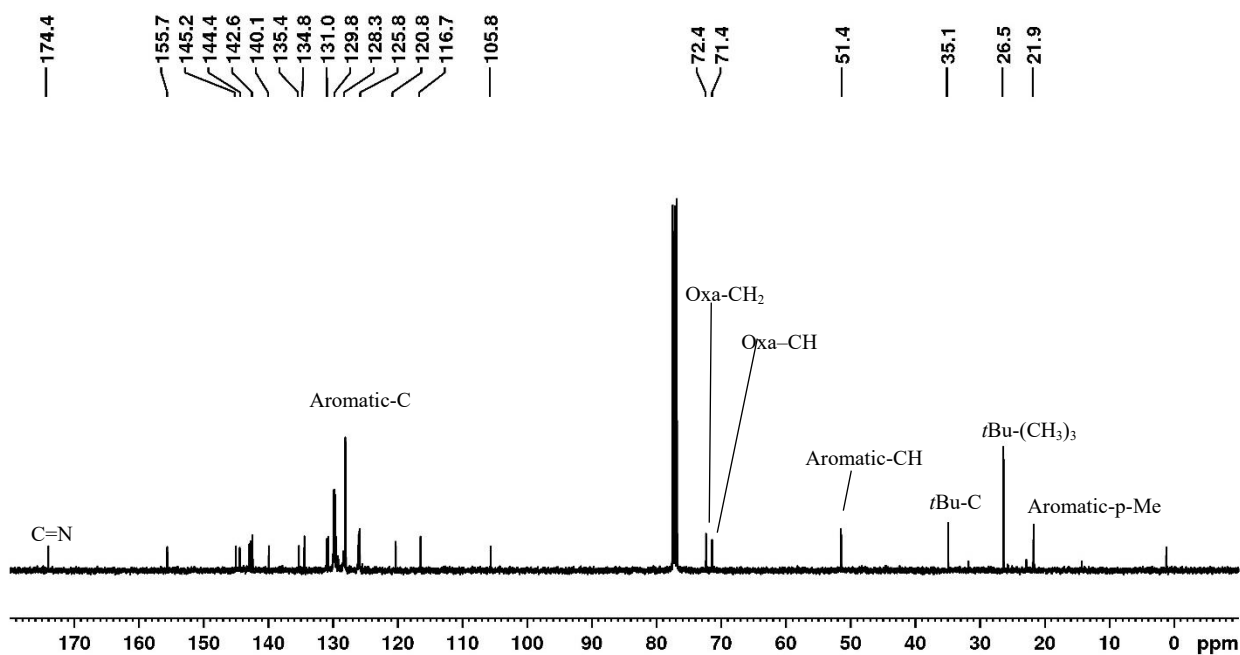

Figure S52.  $^{13}\text{C}$  NMR spectrum of **5eAlCl<sub>2</sub>**.

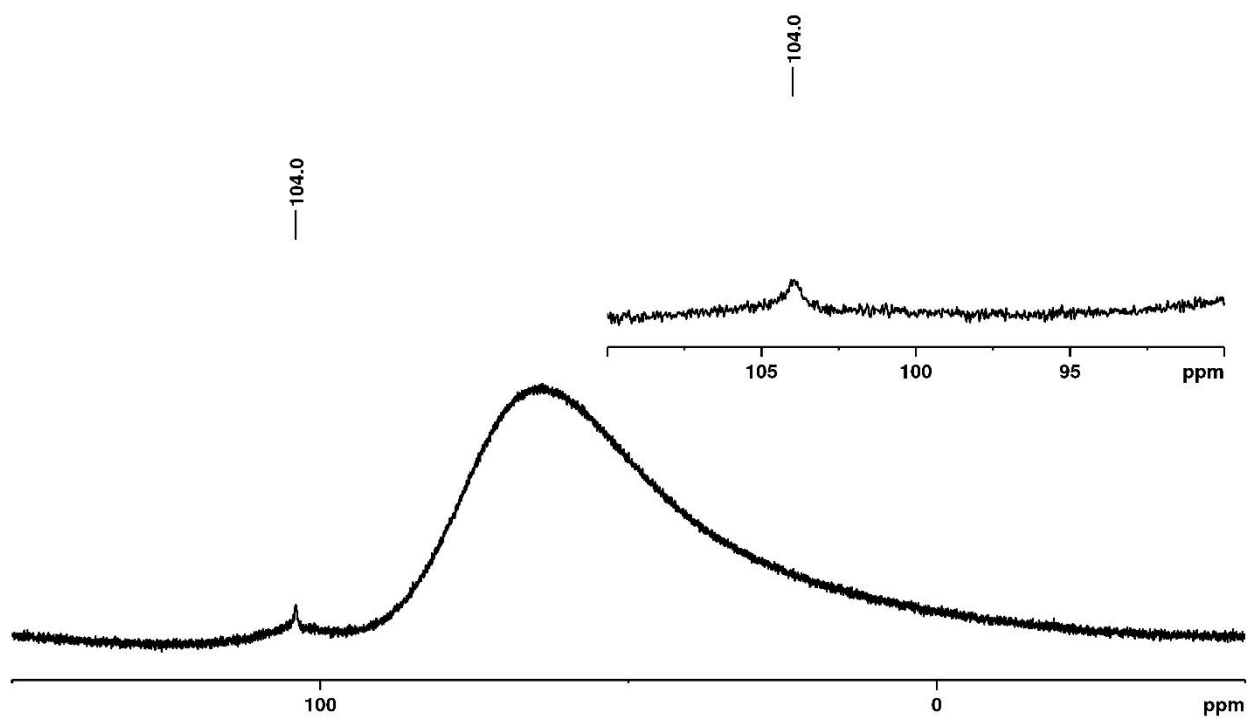

Figure S53.  $^{27}\text{Al}$  NMR spectrum of  $5e\text{AlCl}_2$ .

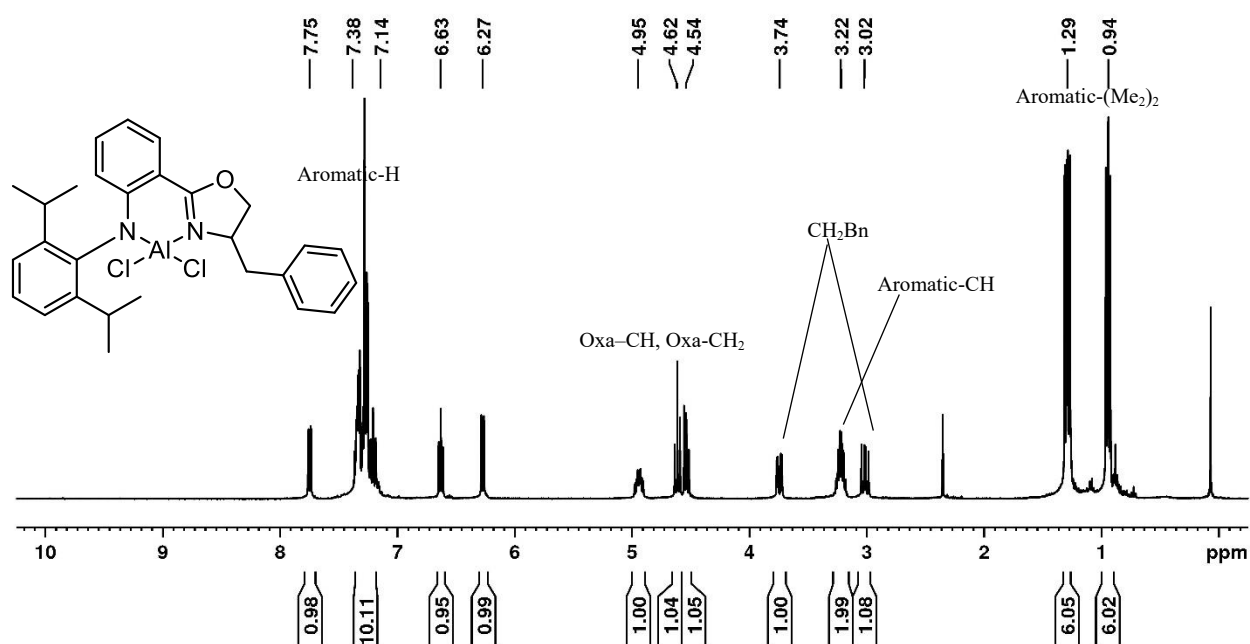

Figure S54.  $^1\text{H}$  NMR spectrum of  $6c\text{AlCl}_2$ .

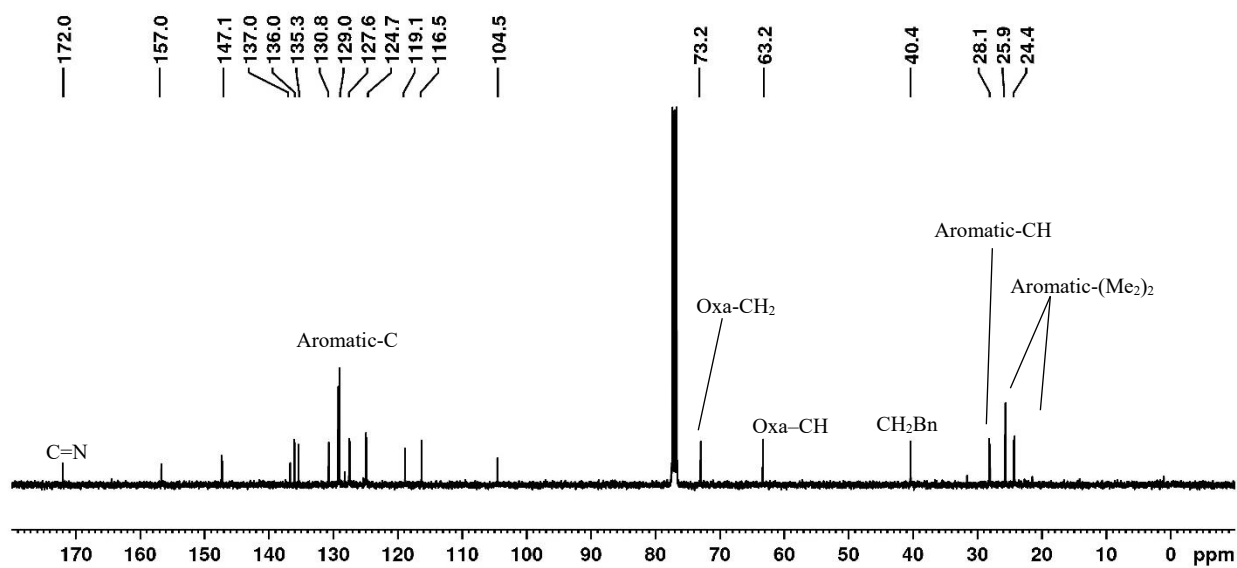

Figure S55.  $^{13}\text{C}$  NMR spectrum of **6cAlCl<sub>2</sub>**.

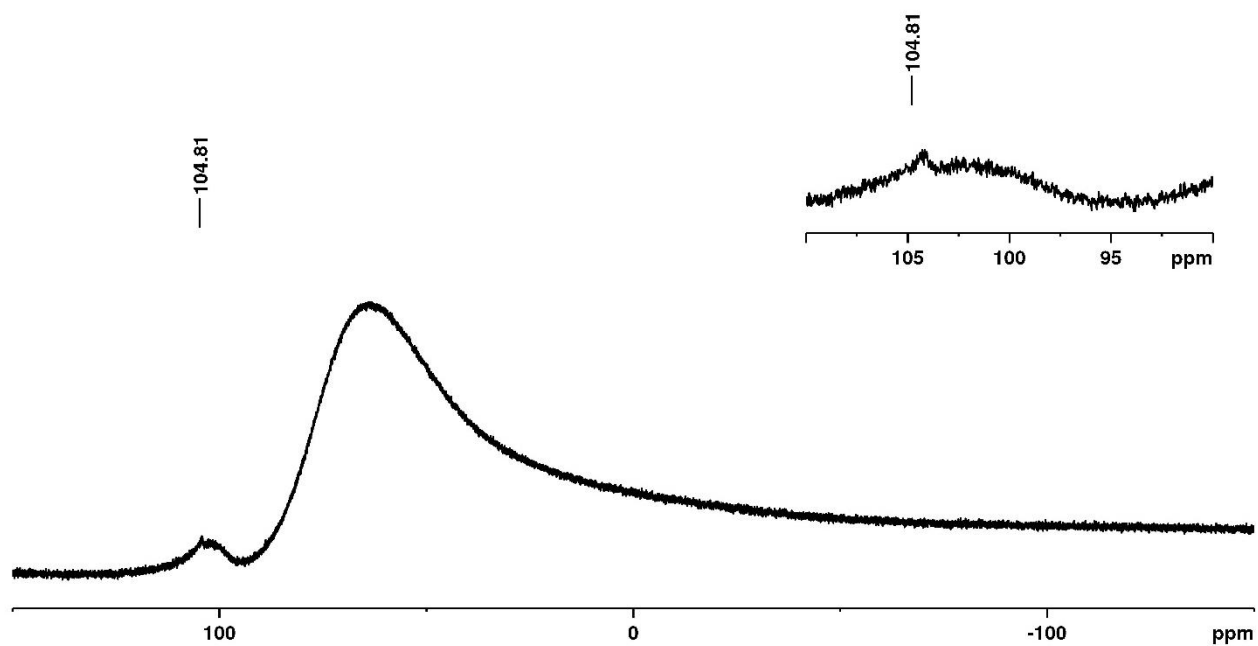

Figure S56.  $^{27}\text{Al}$  NMR spectrum of **6cAlCl<sub>2</sub>**.

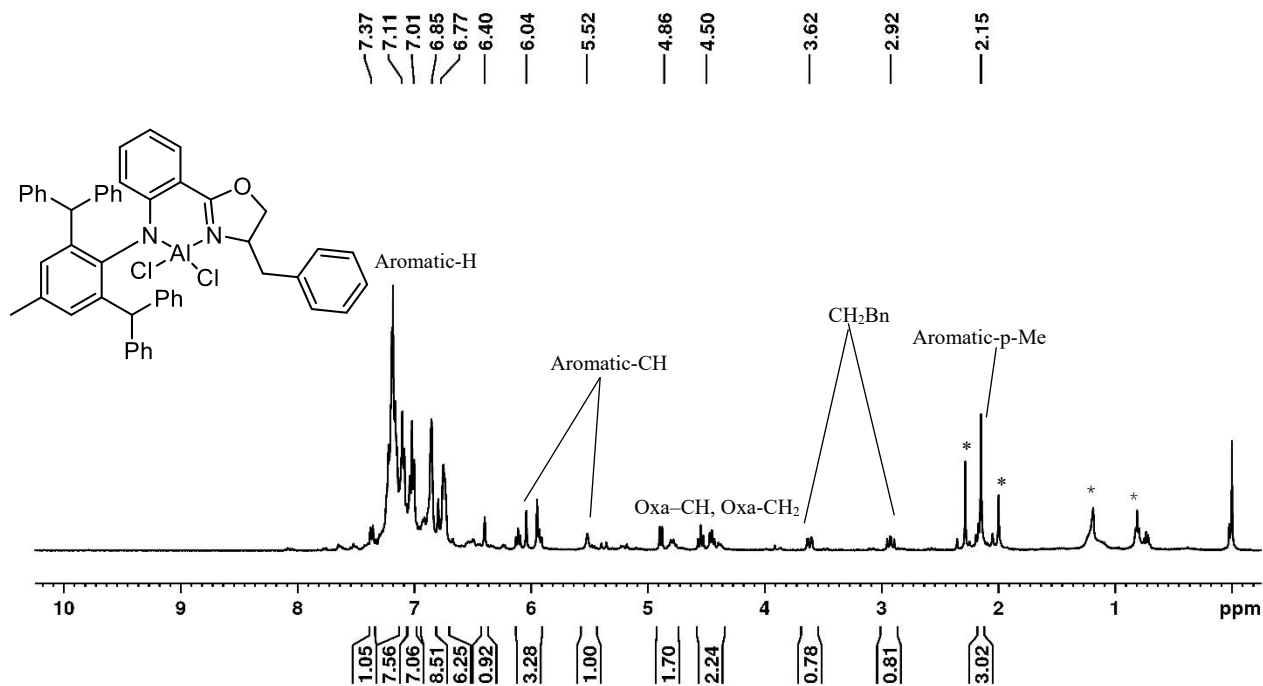

Figure S57. <sup>1</sup>H NMR spectrum of **6eAlCl<sub>2</sub>**. solvent impurities are indicated by \*

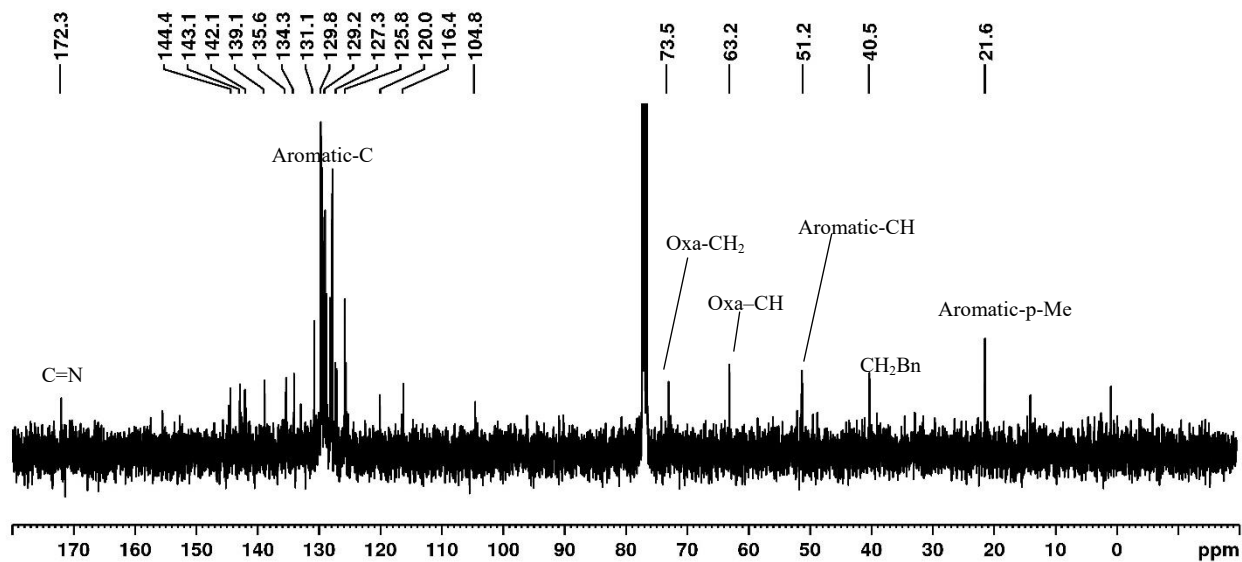

Figure S58. <sup>13</sup>C NMR spectrum of **6eAlCl<sub>2</sub>**.

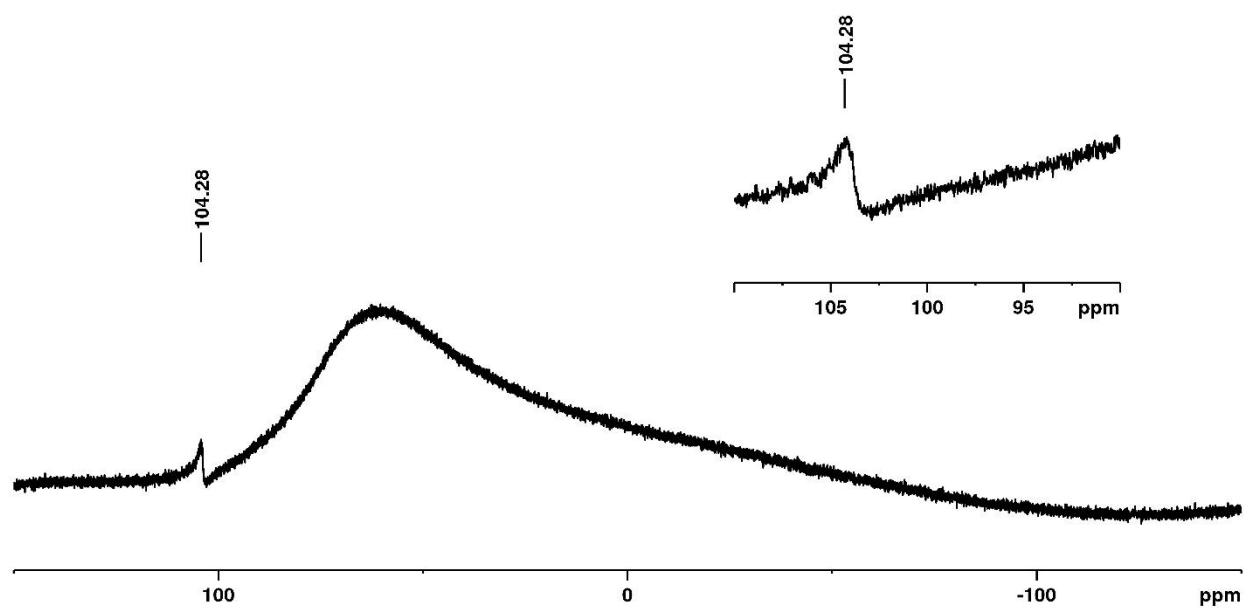

Figure S59.  $^{27}\text{Al}$  NMR spectrum of  $6\text{eAlCl}_2$ .

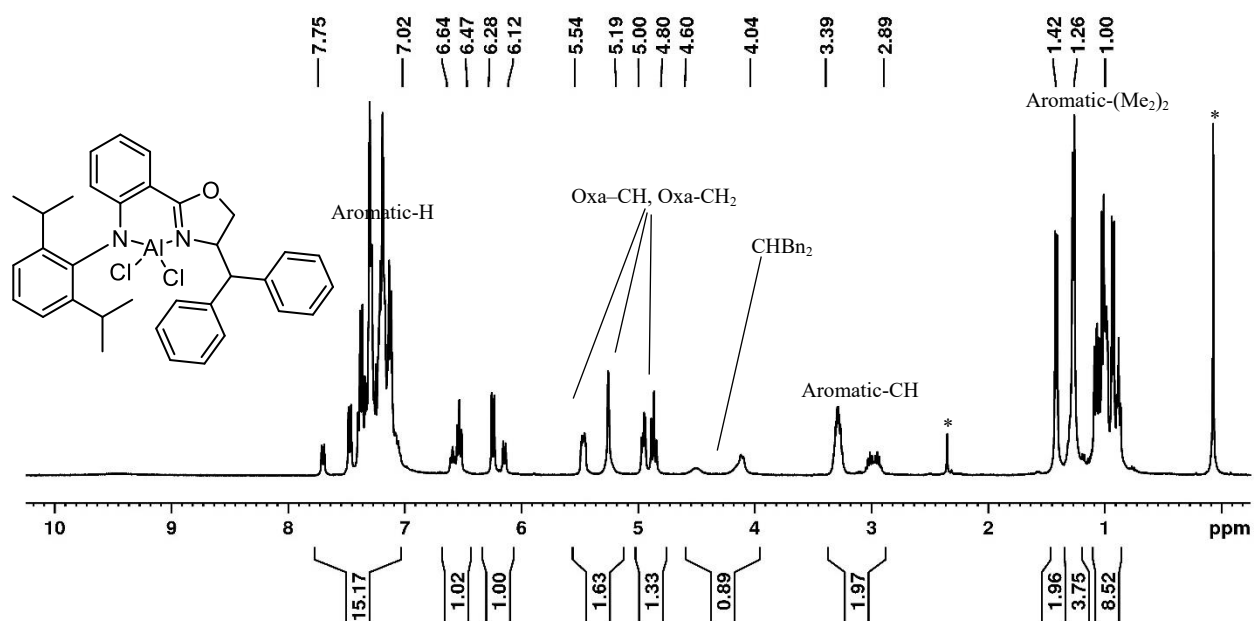

Figure S60.  $^1\text{H}$  NMR spectrum of  $7\text{cAlCl}_2$ . solvent impurities are indicated by \*

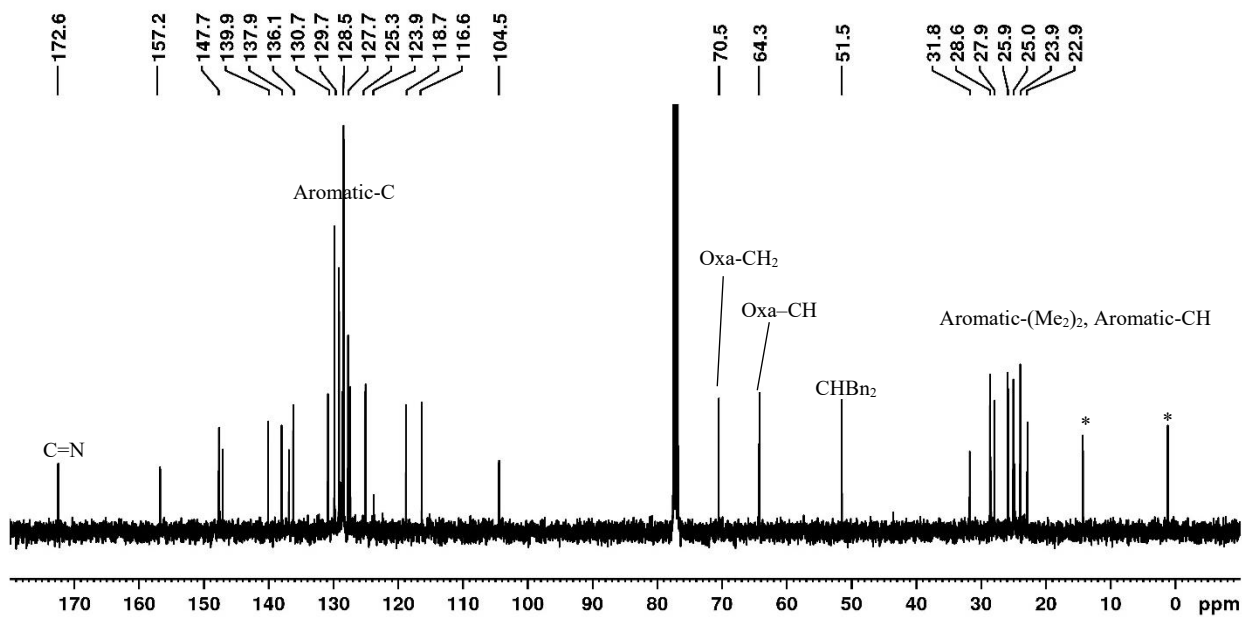

Figure S61.  $^{13}\text{C}$  NMR spectrum of  $7\text{cAlCl}_2$ , solvent impurities are indicated by \*

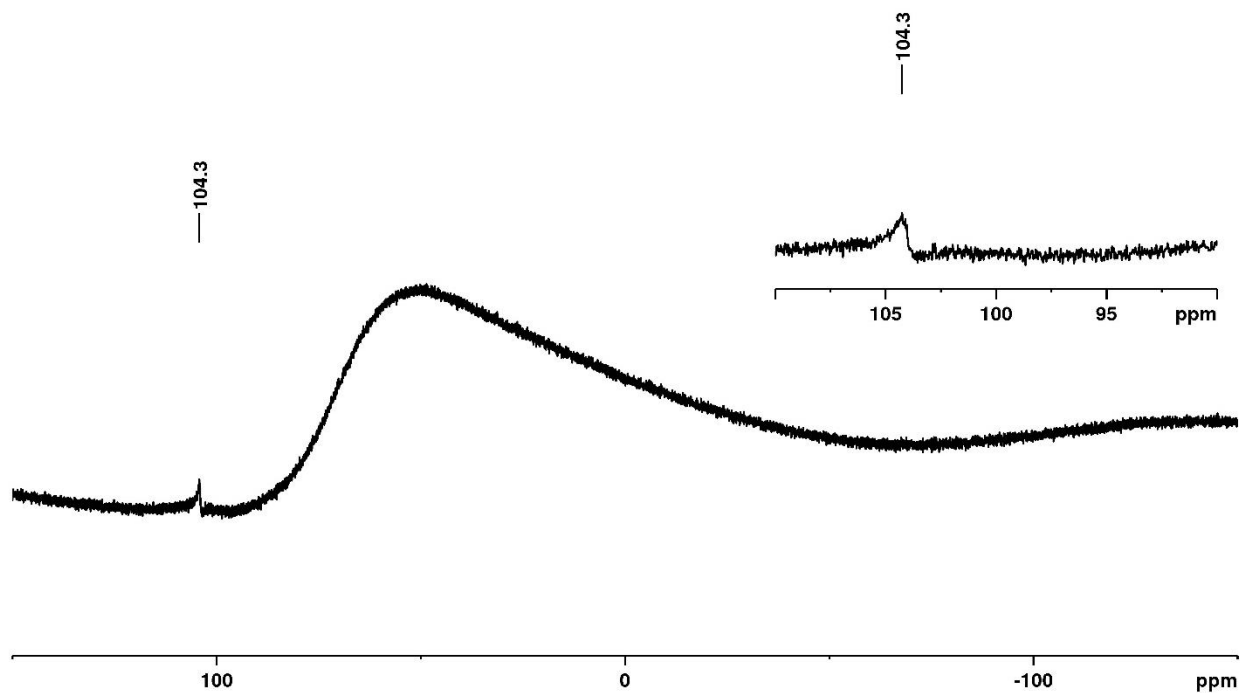

Figure S62.  $^{27}\text{Al}$  NMR spectrum of  $7\text{cAlCl}_2$ .



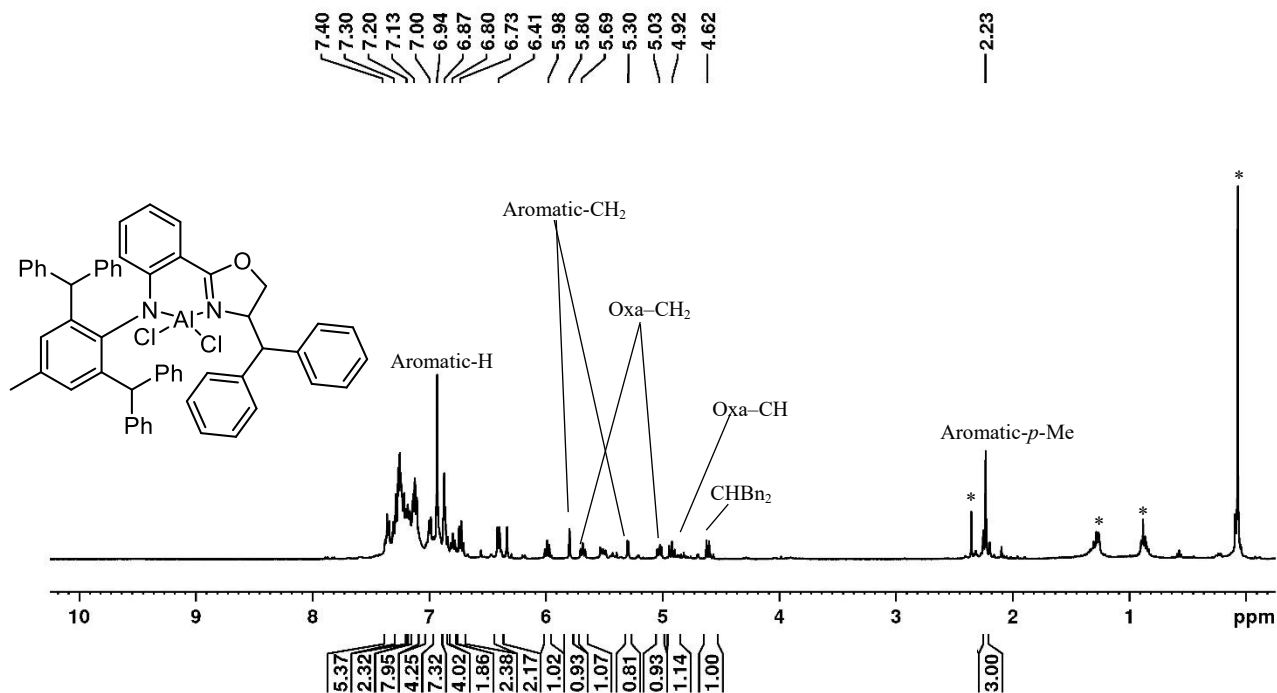

Figure S63.  $^1H$  NMR spectrum of  $7eAlCl_2$ . solvent impurities are indicated by \*

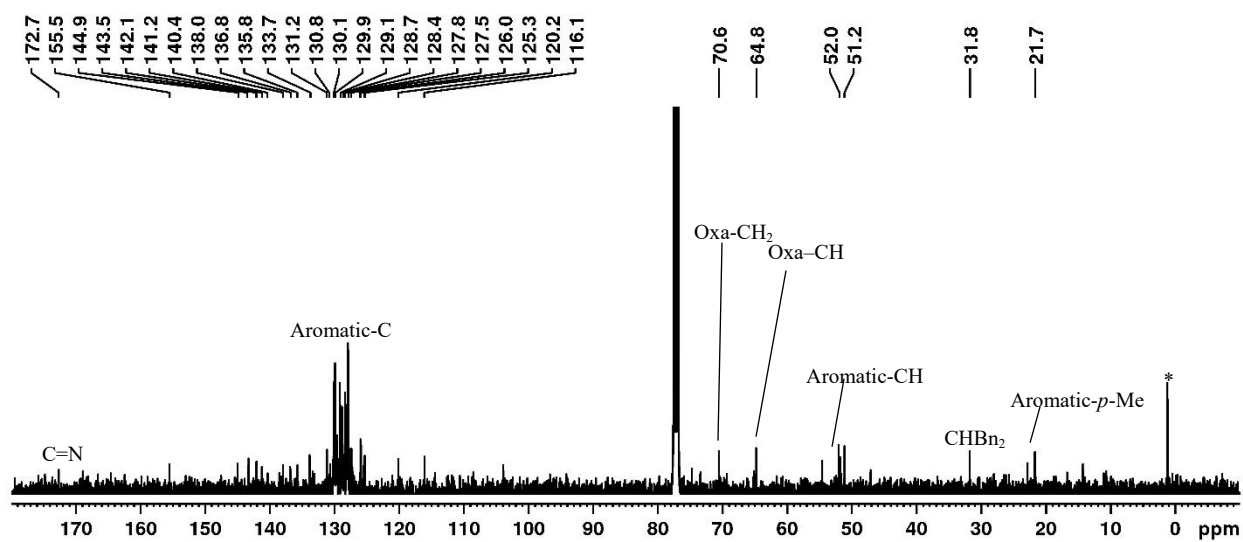

Figure S64.  $^{13}C$  NMR spectrum of  $7eAlCl_2$ .

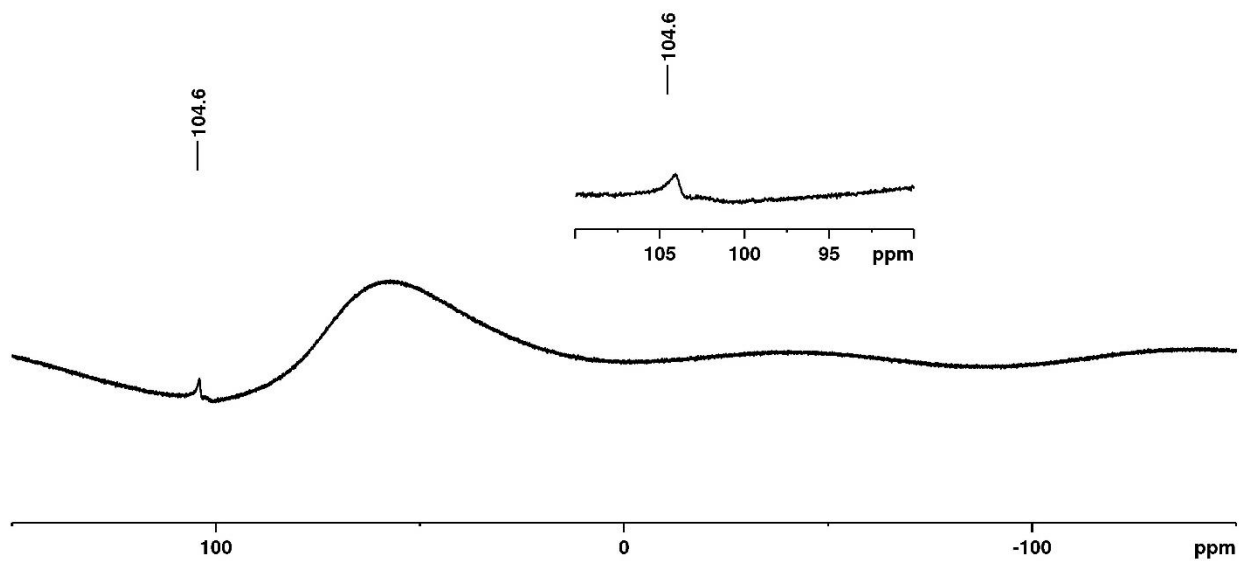

Figure S65.  $^{27}\text{Al}$  NMR spectrum of  $7\text{eAlCl}_2$ .

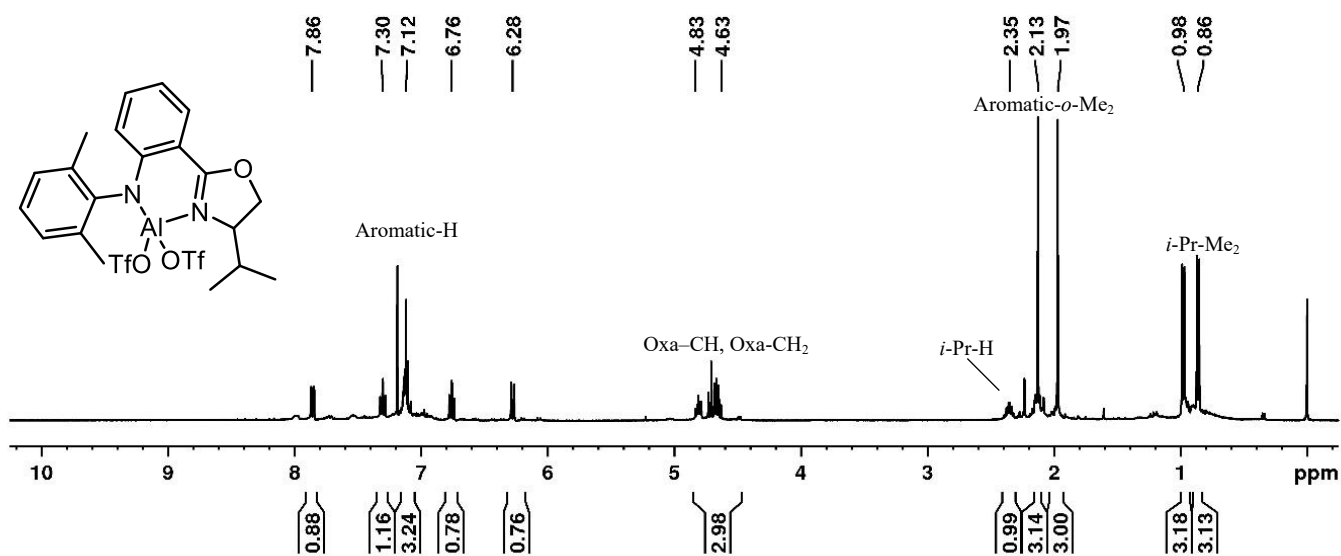

Figure S66.  $^1\text{H}$  NMR spectrum of  $4\text{aAl}(\text{OTf})_2$ .

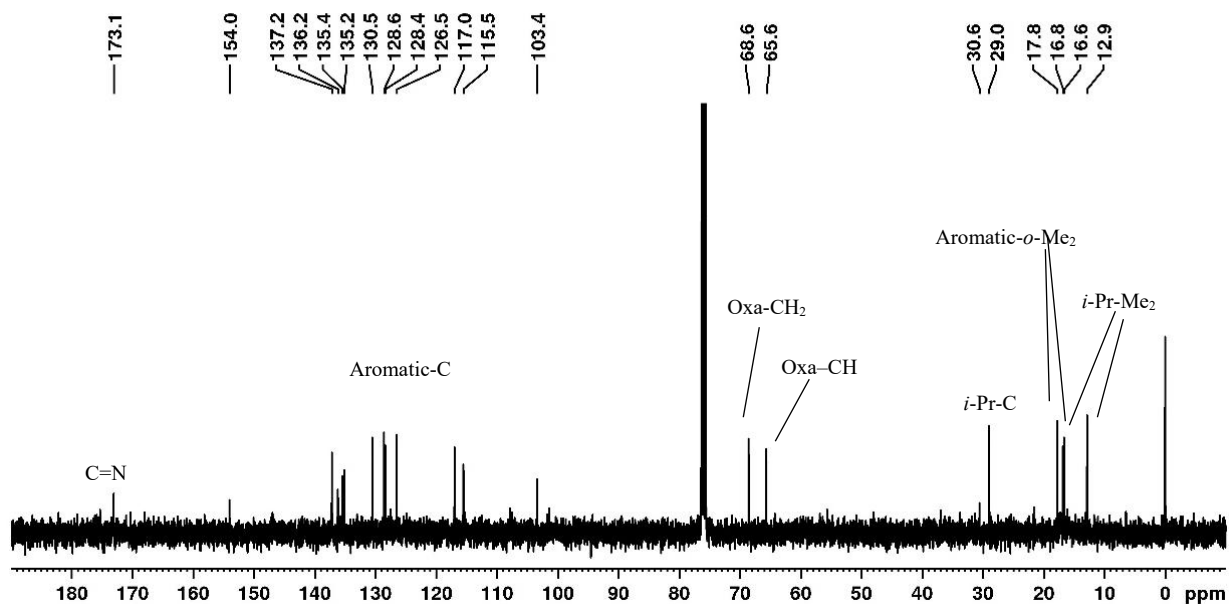

Figure S67.  $^{13}\text{C}$  NMR spectrum of **4aAl(OTf)<sub>2</sub>**.

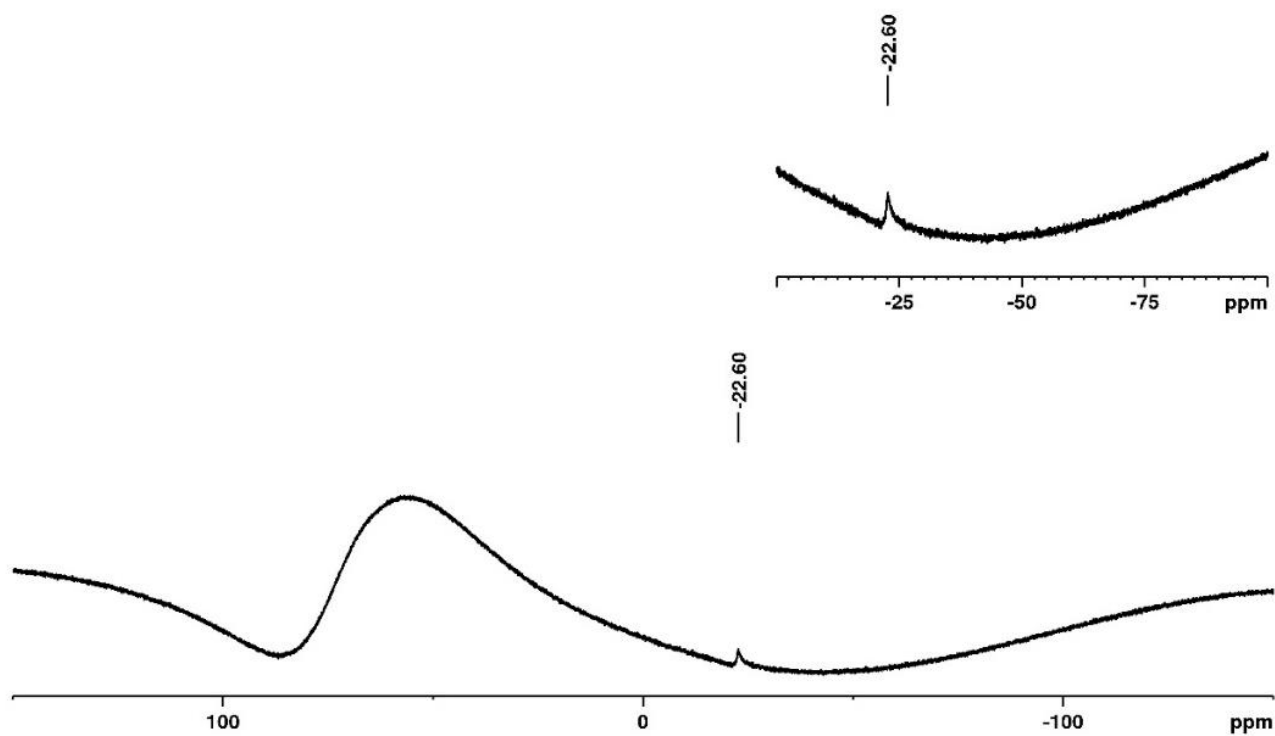

Figure S68.  $^{27}\text{Al}$  NMR spectrum of **4aAl(OTf)<sub>2</sub>**.

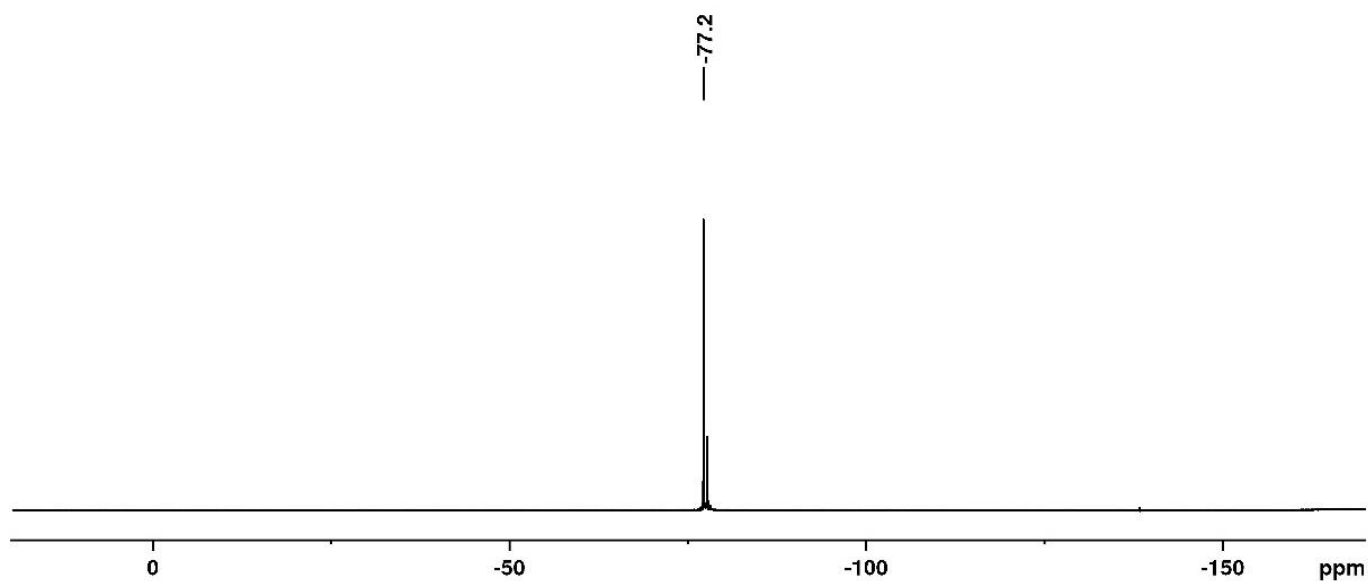

Figure S68.  $^{19}\text{F}$  NMR spectrum of  $4\text{aAl}(\text{OTf})_2$ .

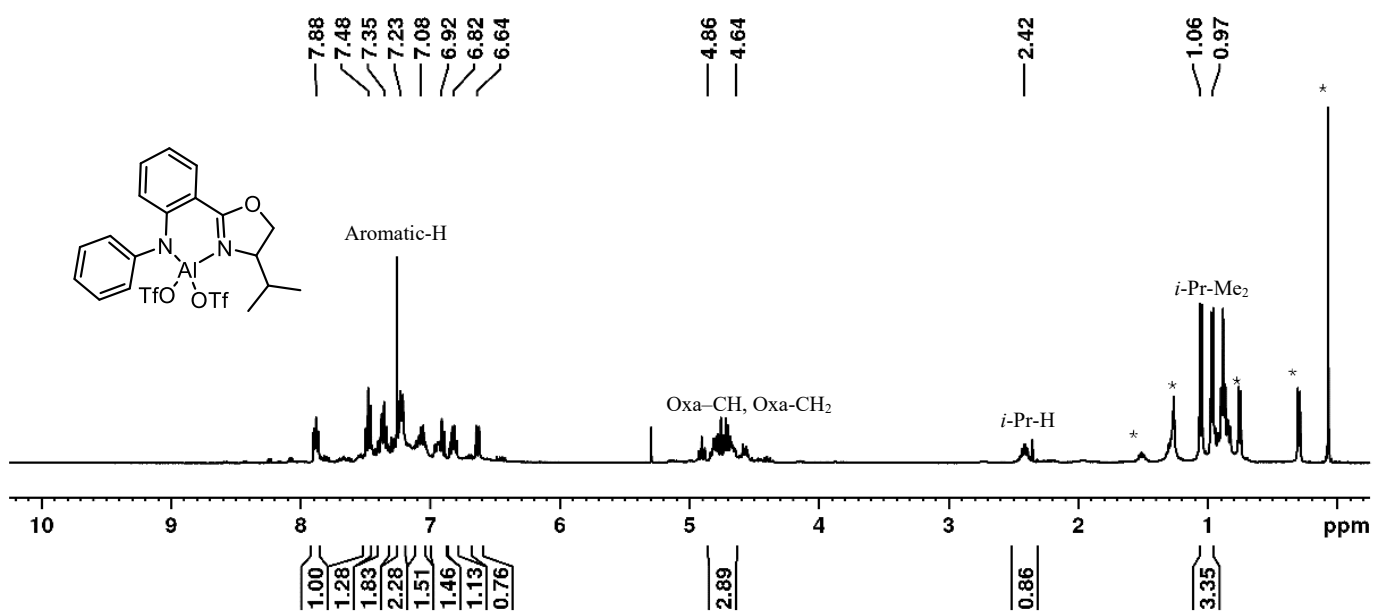

Figure S69.  $^1\text{H}$  NMR spectrum of  $4\text{bAl}(\text{OTf})_2$ . Note: solvent impurities are indicated by \*

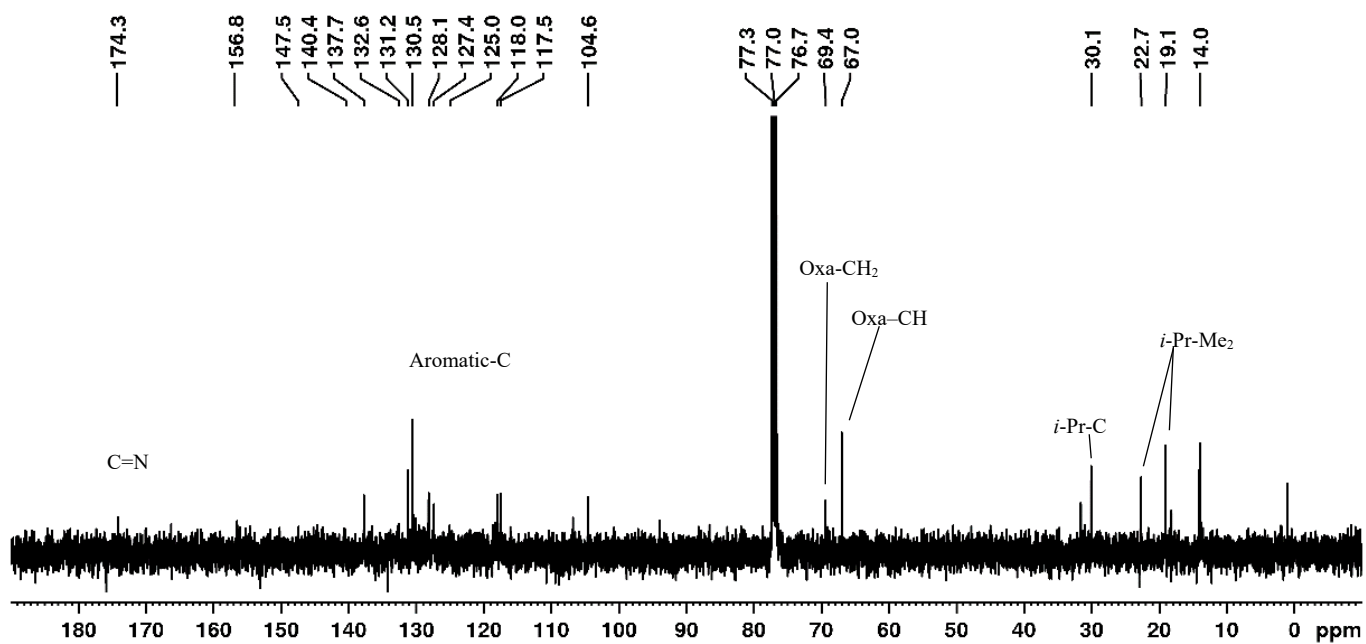

Figure S70.  $^{13}\text{C}$  NMR spectrum of **4bAl(OTf)<sub>2</sub>**.

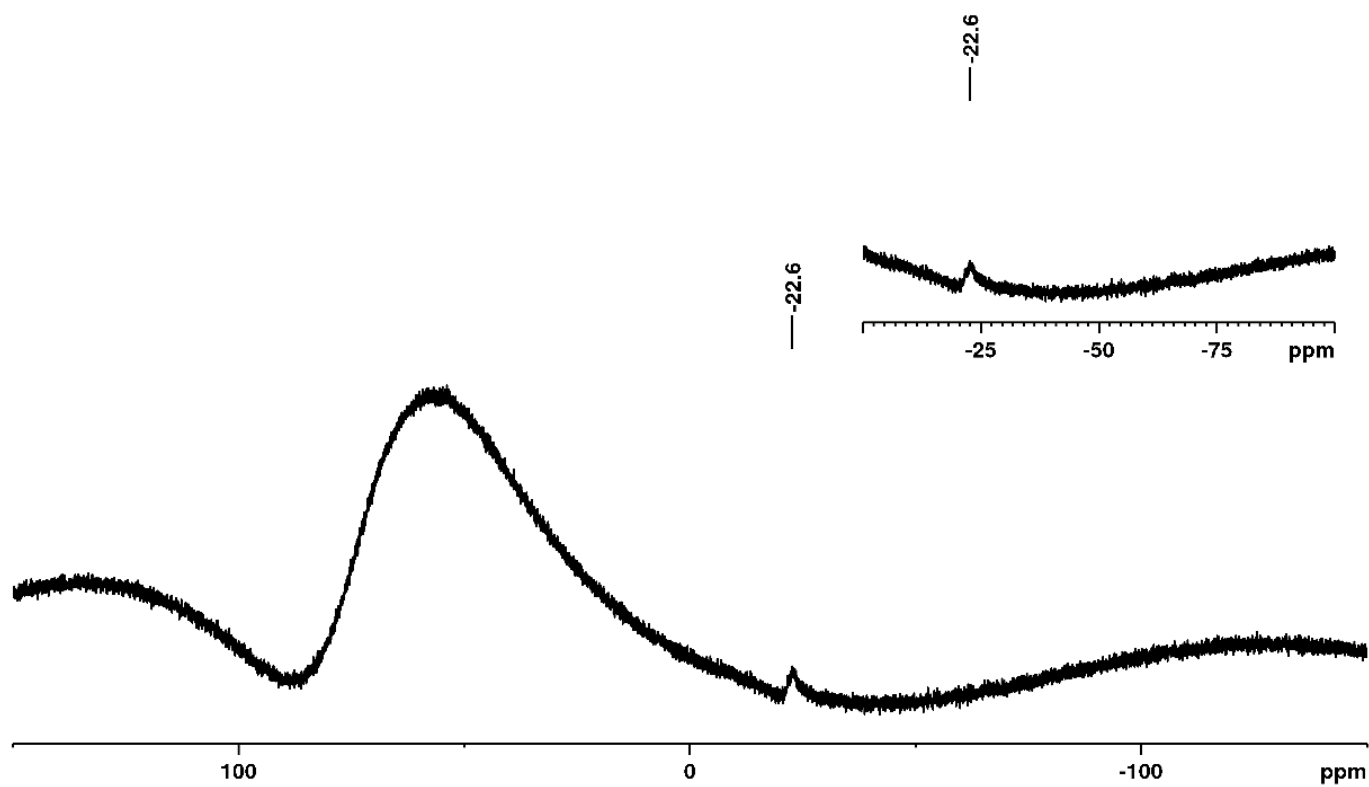

Figure S71.  $^{27}\text{Al}$  NMR spectrum of **4bAl(OTf)<sub>2</sub>**.

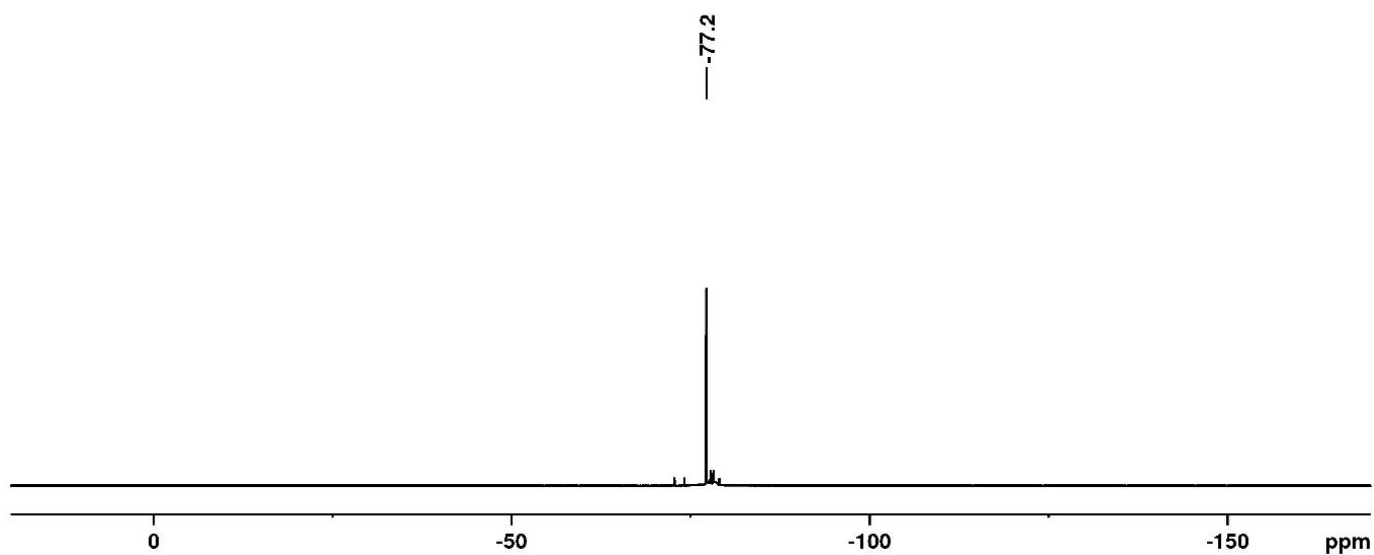

Figure S72.  $^{19}\text{F}$  NMR spectrum of  $4\text{bAl}(\text{OTf})_2$ .

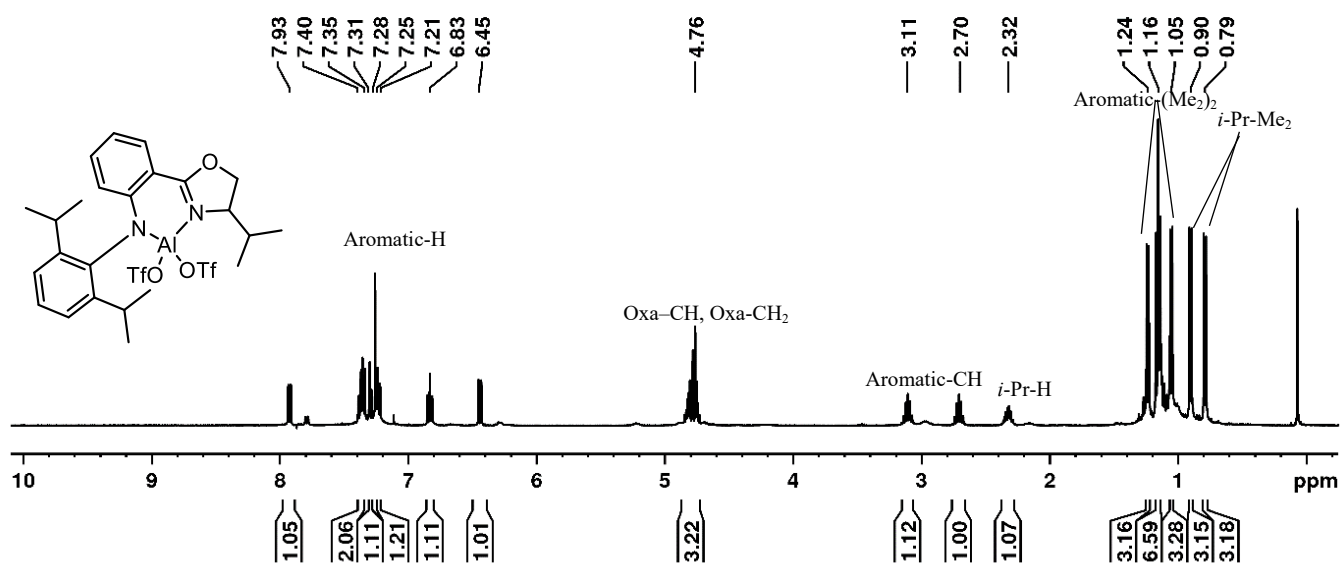

Figure S73.  $^1\text{H}$  NMR spectrum of  $4\text{cAl}(\text{OTf})_2$ .

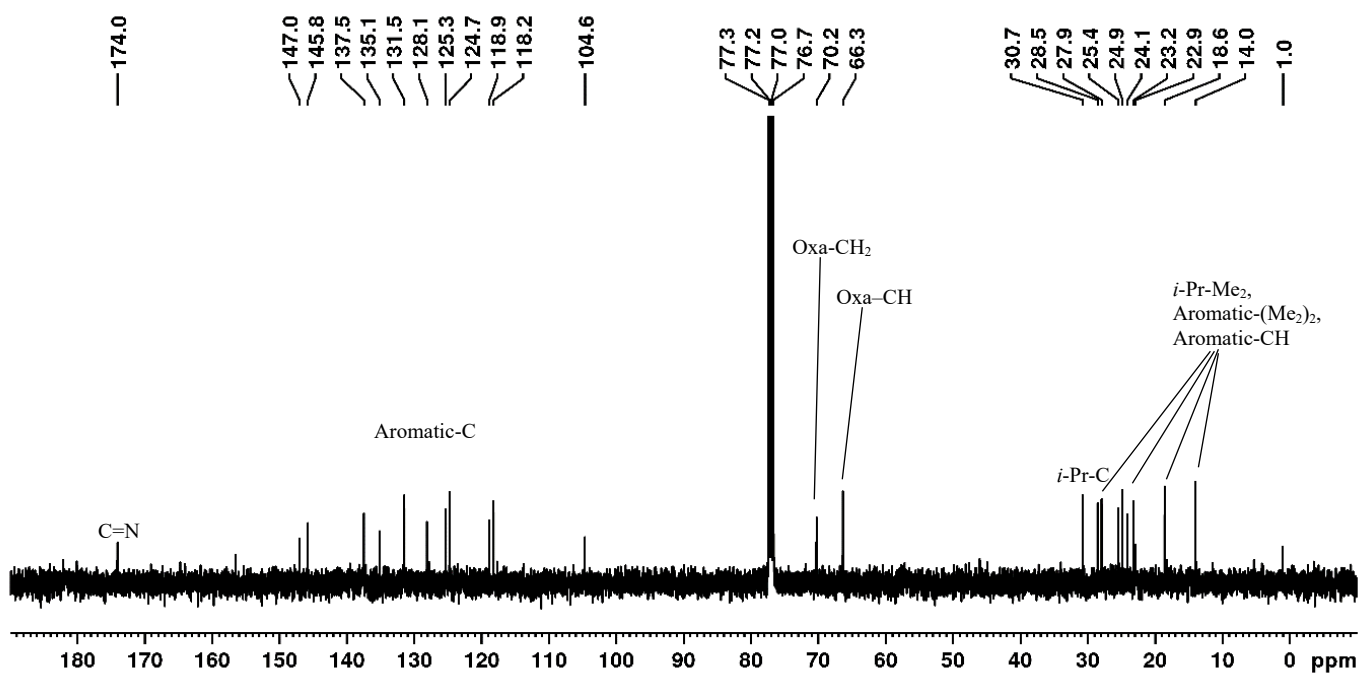

Figure S74.  $^{13}\text{C}$  NMR spectrum of  $4\text{cAl}(\text{OTf})_2$ .

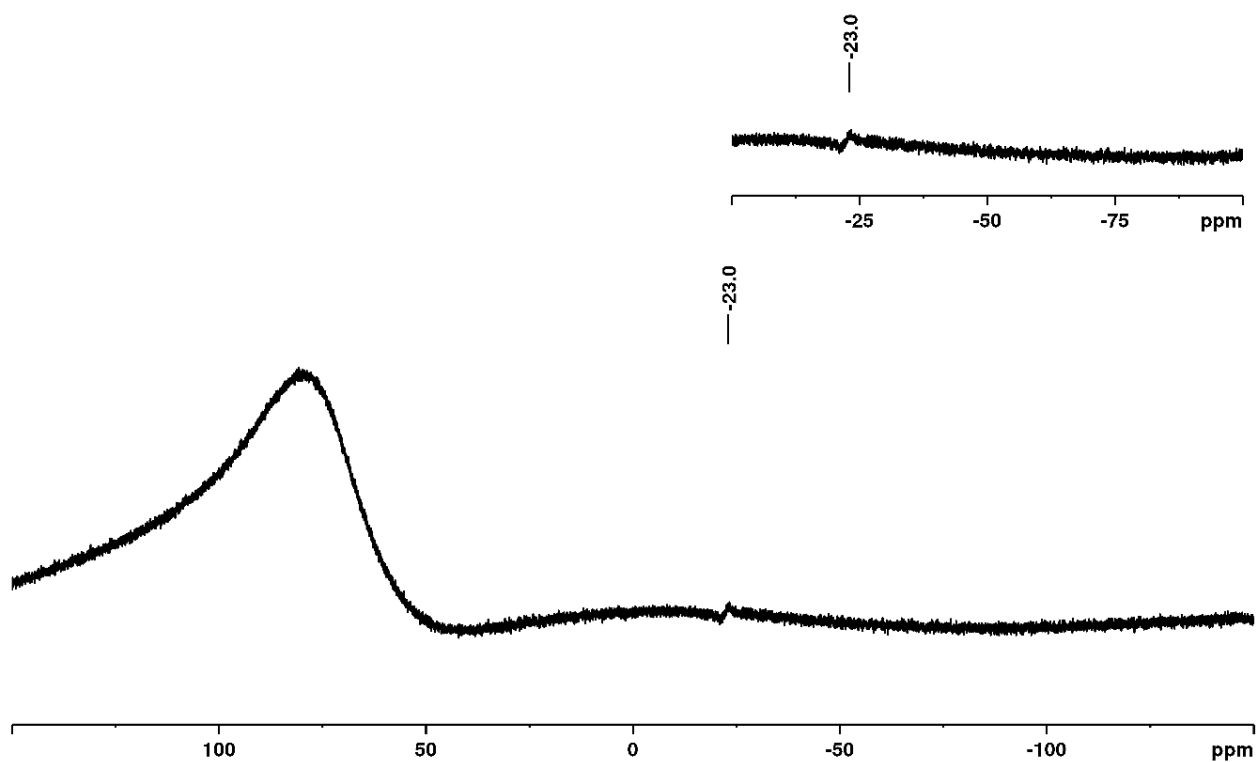

Figure S75.  $^{27}\text{Al}$  NMR spectrum of  $4\text{cAl}(\text{OTf})_2$ .

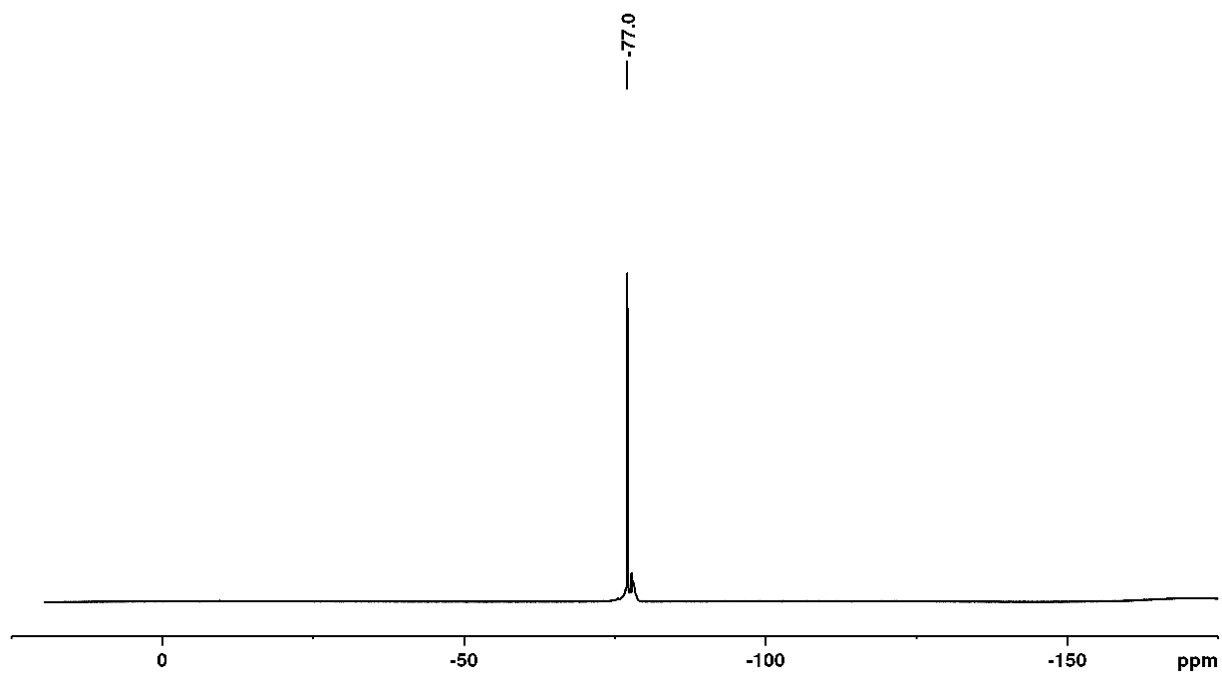

Figure S76.  $^{19}\text{F}$  NMR spectrum of  $4\text{cAl}(\text{OTf})_2$ .

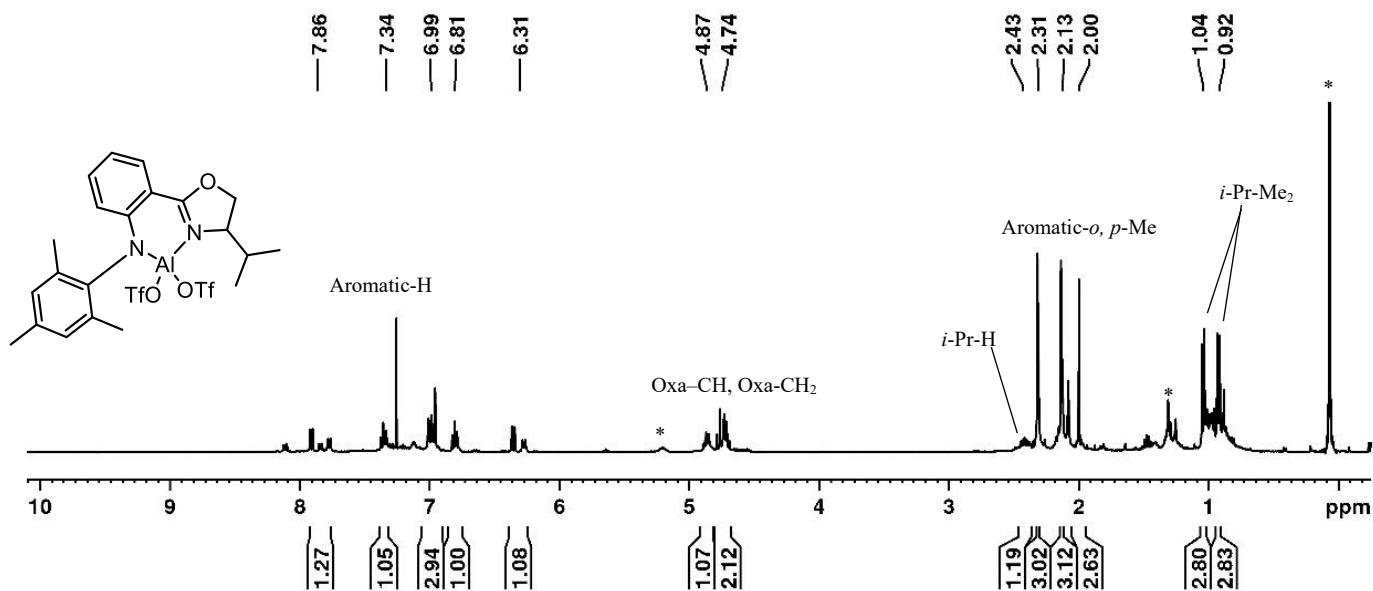

Figure S 77.  $^1\text{H}$  NMR spectrum of  $4\text{dAl}(\text{OTf})_2$ . Note: solvent impurities are indicated by \*



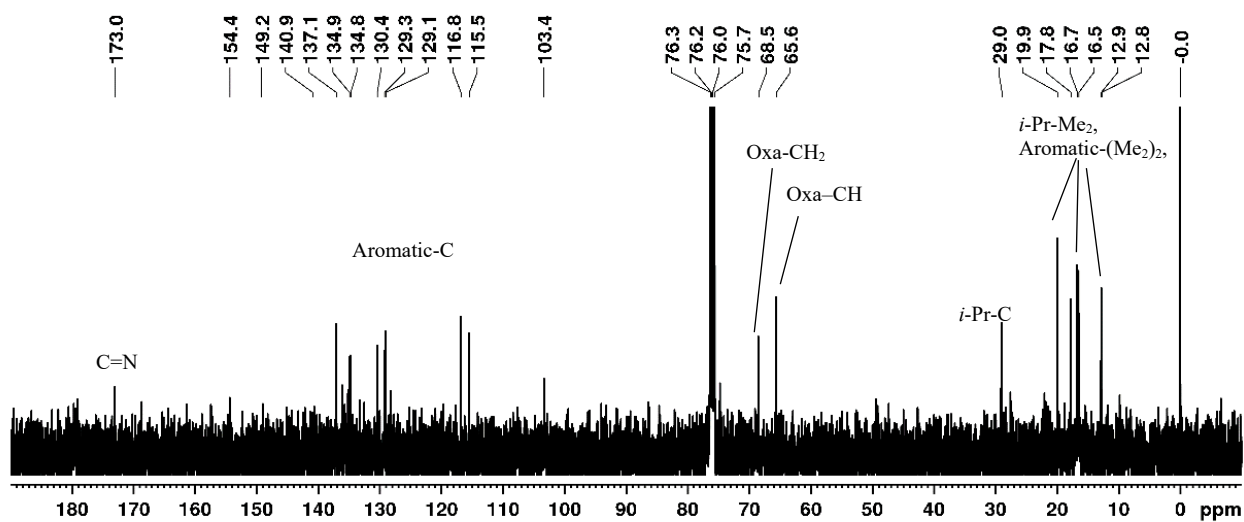

Figure S78. <sup>13</sup>C NMR spectrum of **4dAl(OTf)<sub>2</sub>**.

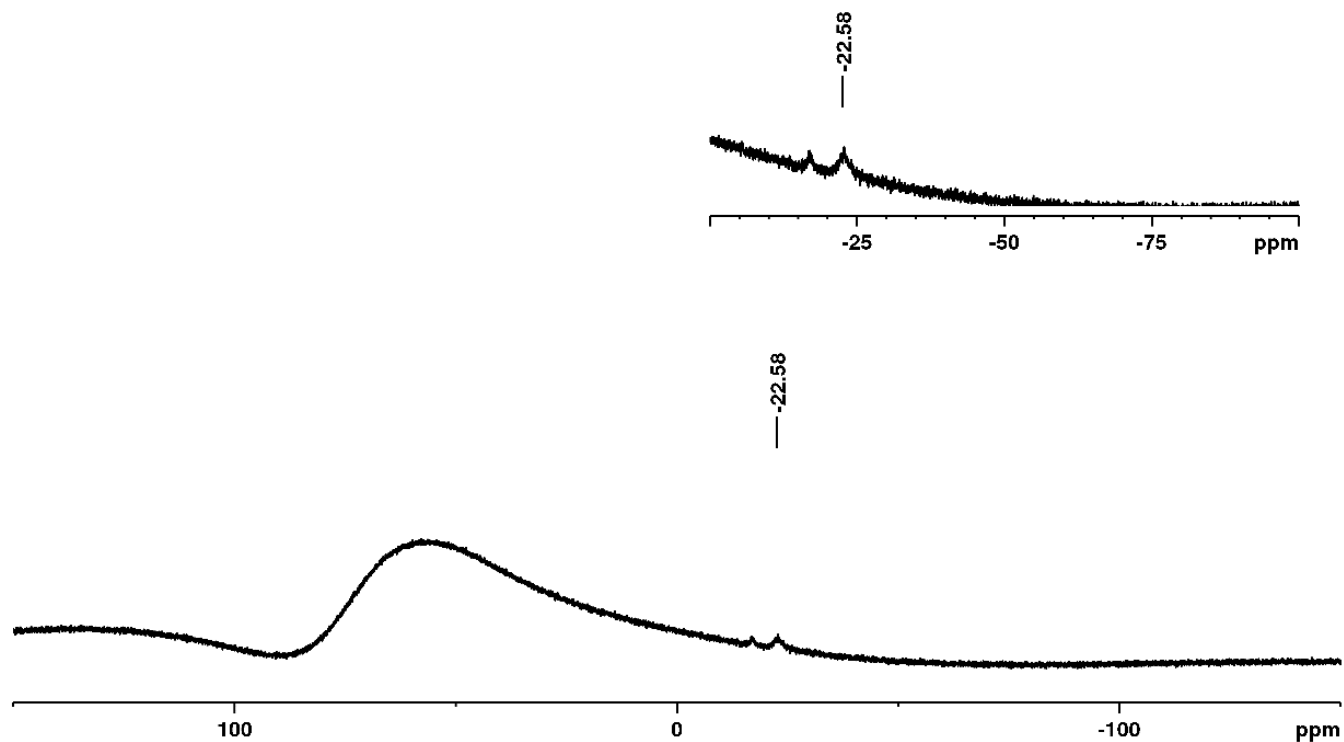

Figure S79. <sup>27</sup>Al NMR spectrum of **4dAl(OTf)<sub>2</sub>**.

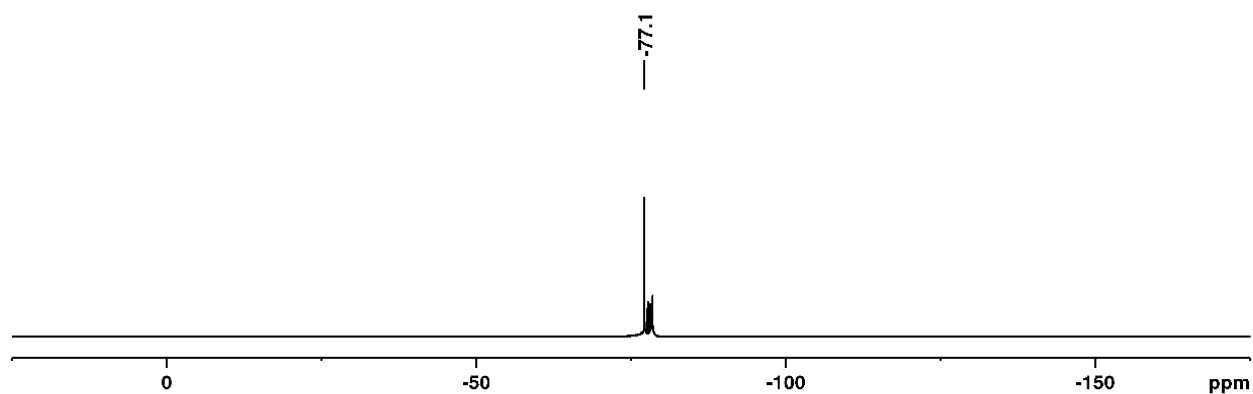

Figure S80.  $^{19}\text{F}$  NMR spectrum of  $4\text{dAl}(\text{OTf})_2$ .

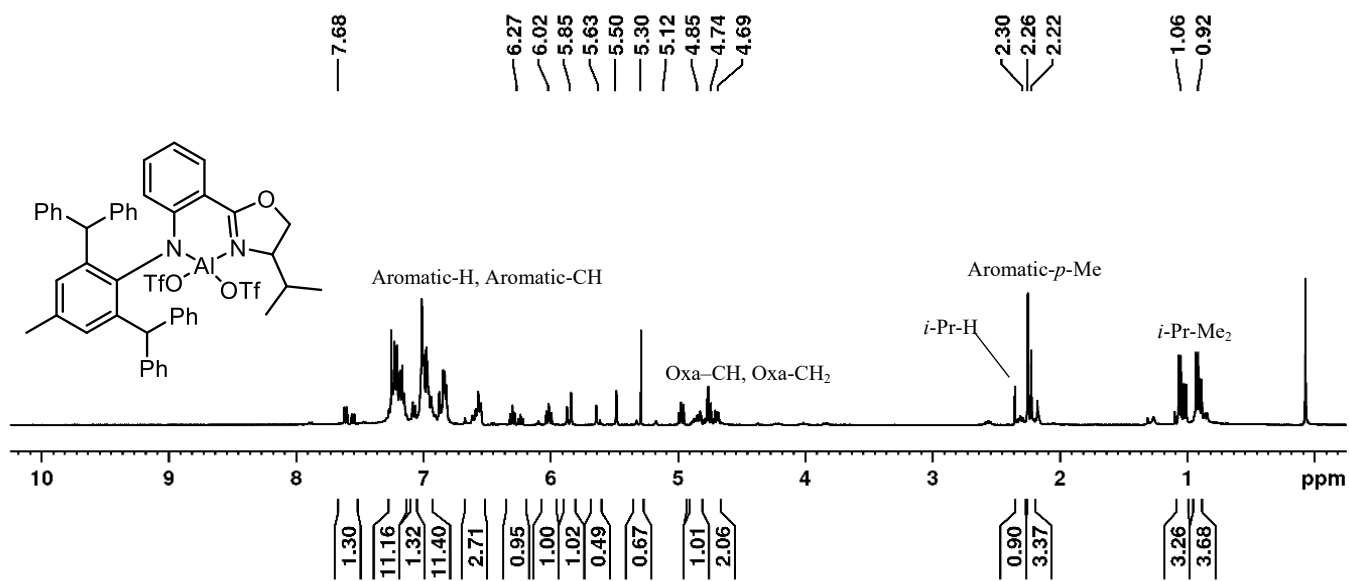

Figure S81.  $^1\text{H}$  NMR spectrum spectrum of  $4\text{eAl}(\text{OTf})_2$ .

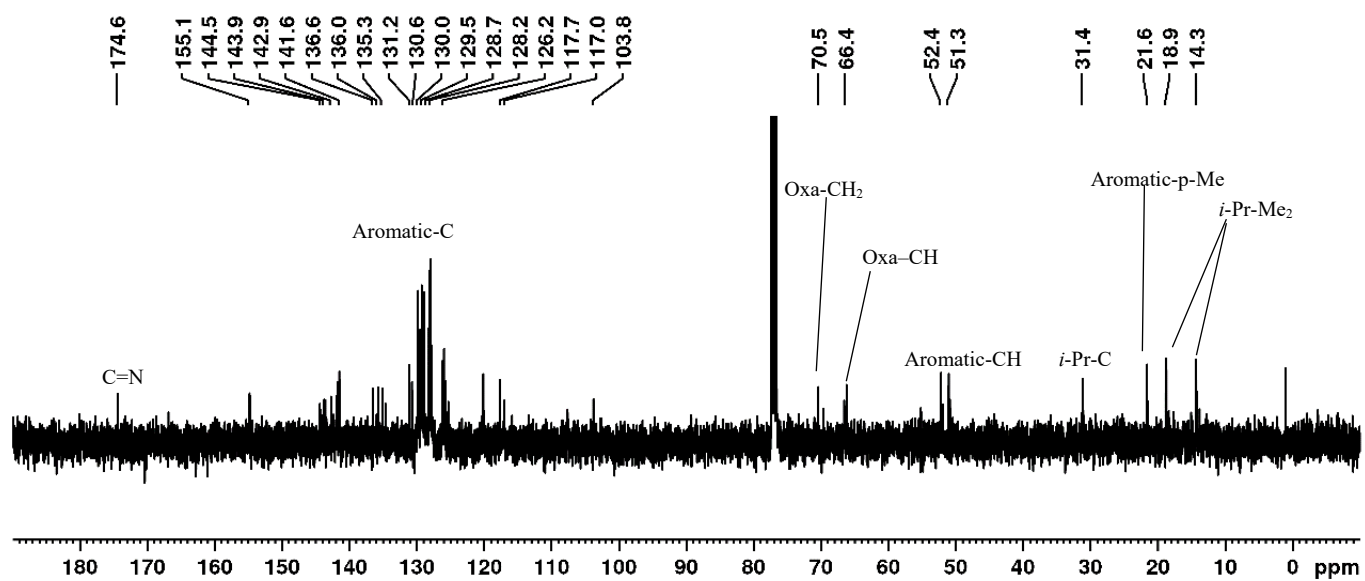

Figure S82.  $^{13}\text{C}$  NMR spectrum of  $4\text{eAl}(\text{OTf})_2$ .

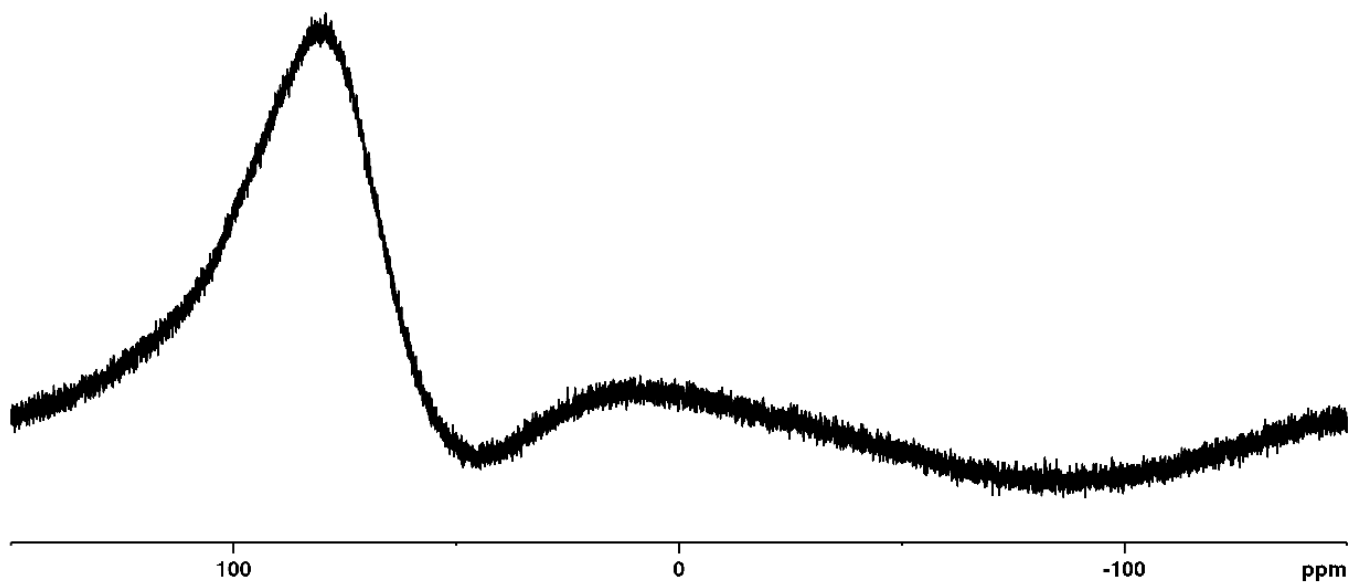

Figure S83.  $^{27}\text{Al}$  NMR spectrum of  $4\text{eAl}(\text{OTf})_2$ .

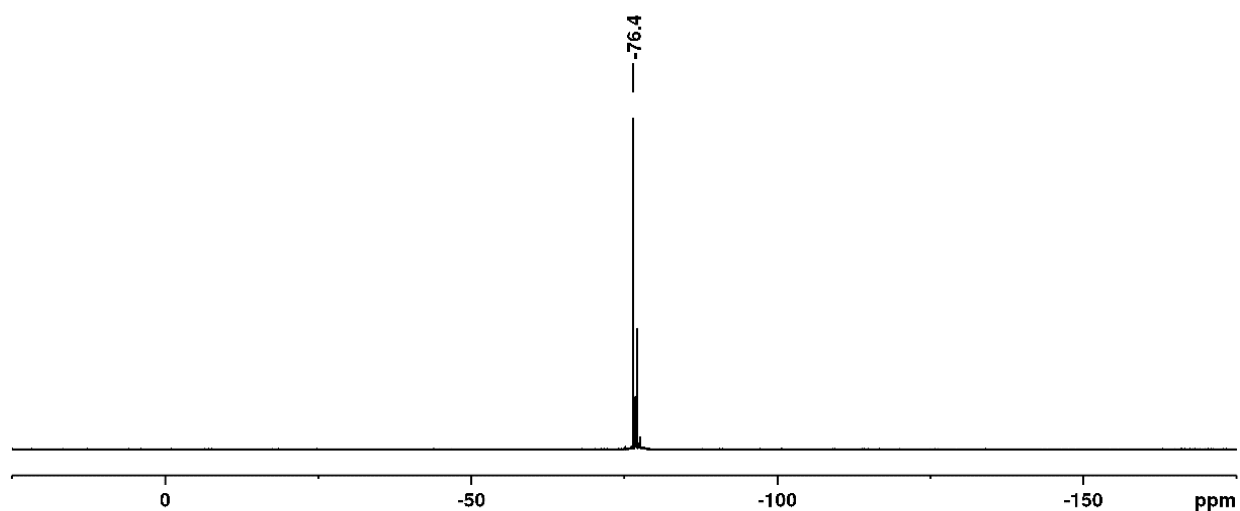

Figure S84.  $^{19}\text{F}$  NMR spectrum of  $4\text{eAl}(\text{OTf})_2$ .

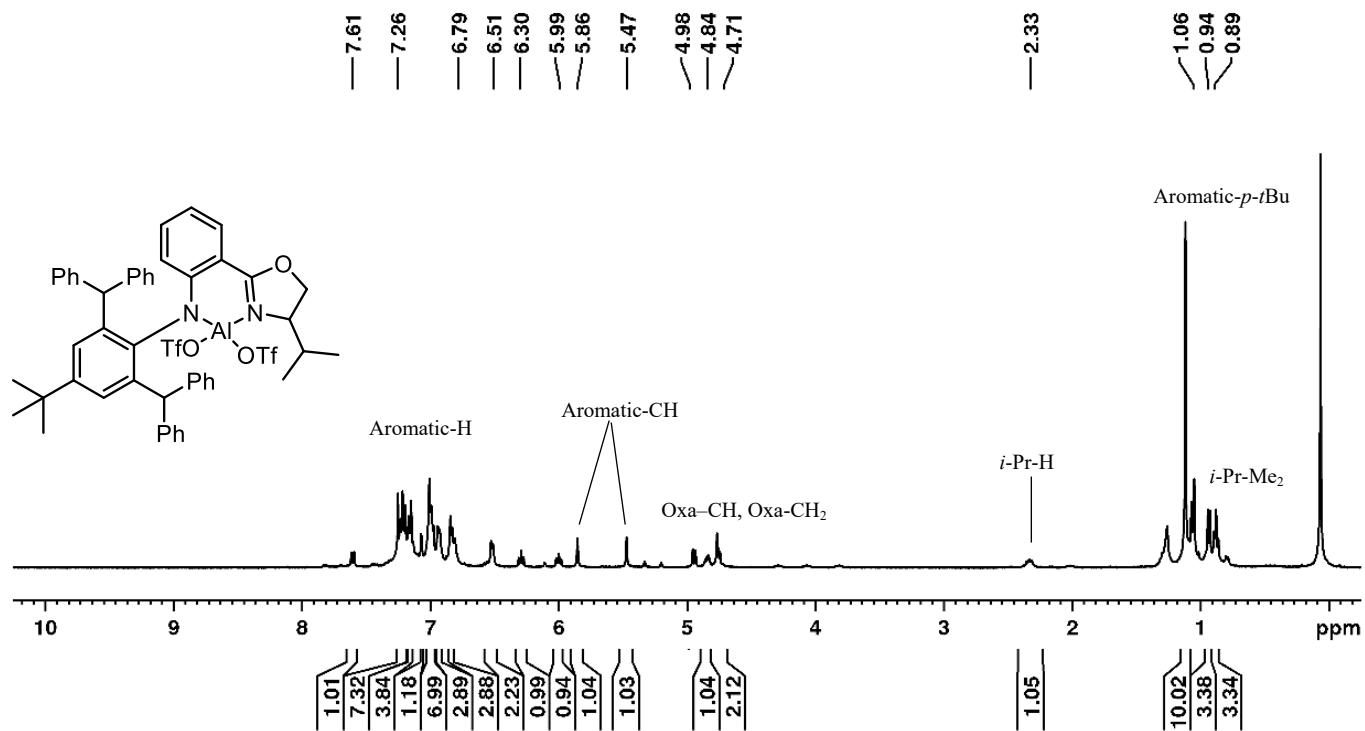

Figure S85.  $^1\text{H}$  NMR spectrum of  $4\text{fAl}(\text{OTf})_2$ .

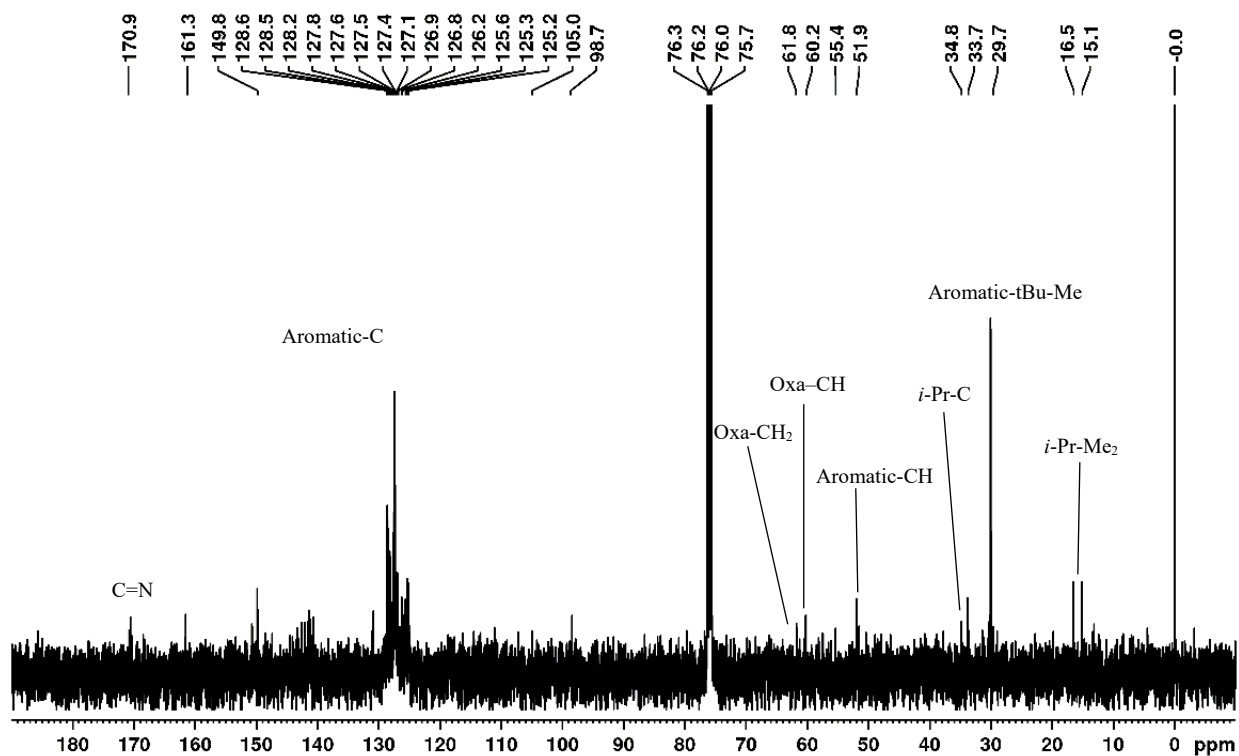

Figure S86.  $^{13}\text{C}$  NMR spectrum of  $4\text{fAl}(\text{OTf})_2$ .

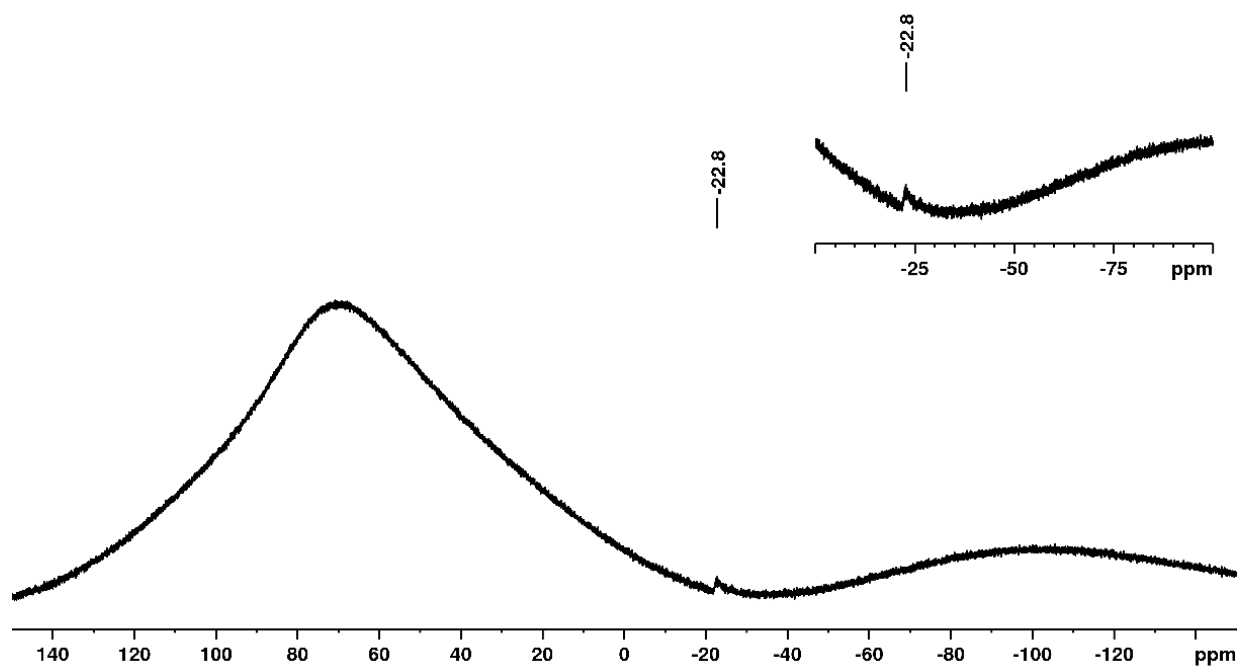

Figure S87.  $^{27}\text{Al}$  NMR spectrum of  $4\text{fAl}(\text{OTf})_2$ .

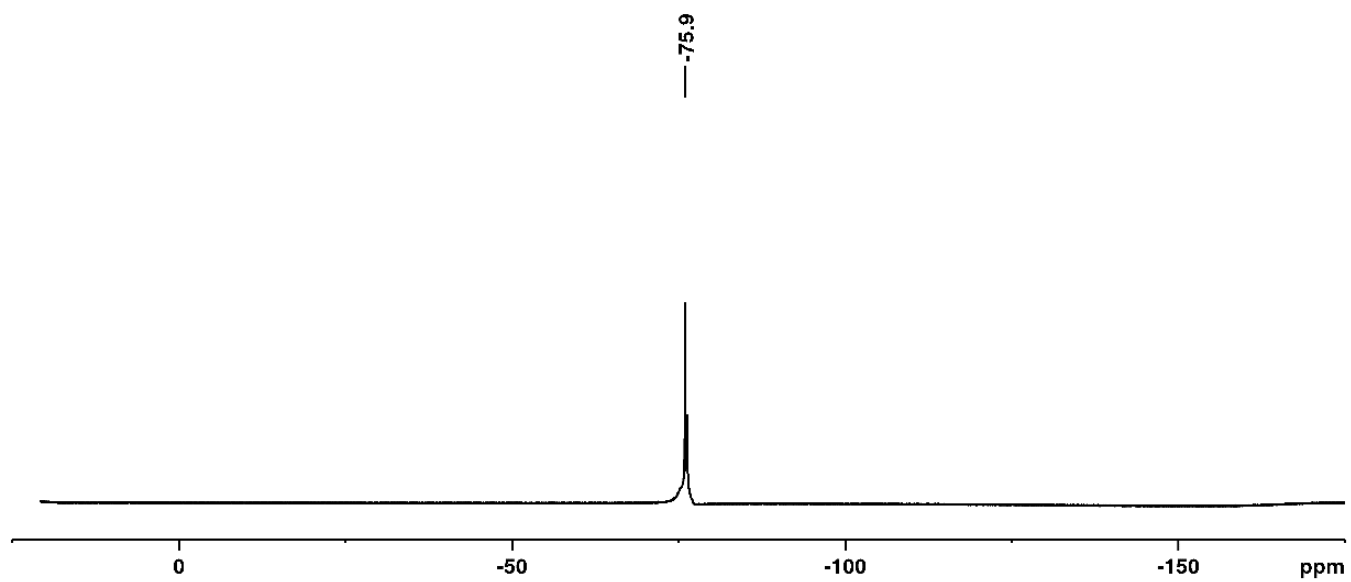

Figure S88.  $^{19}\text{F}$  NMR spectrum of  $4\text{fAl}(\text{OTf})_2$ .

NMR Spectrum of DA Adducts

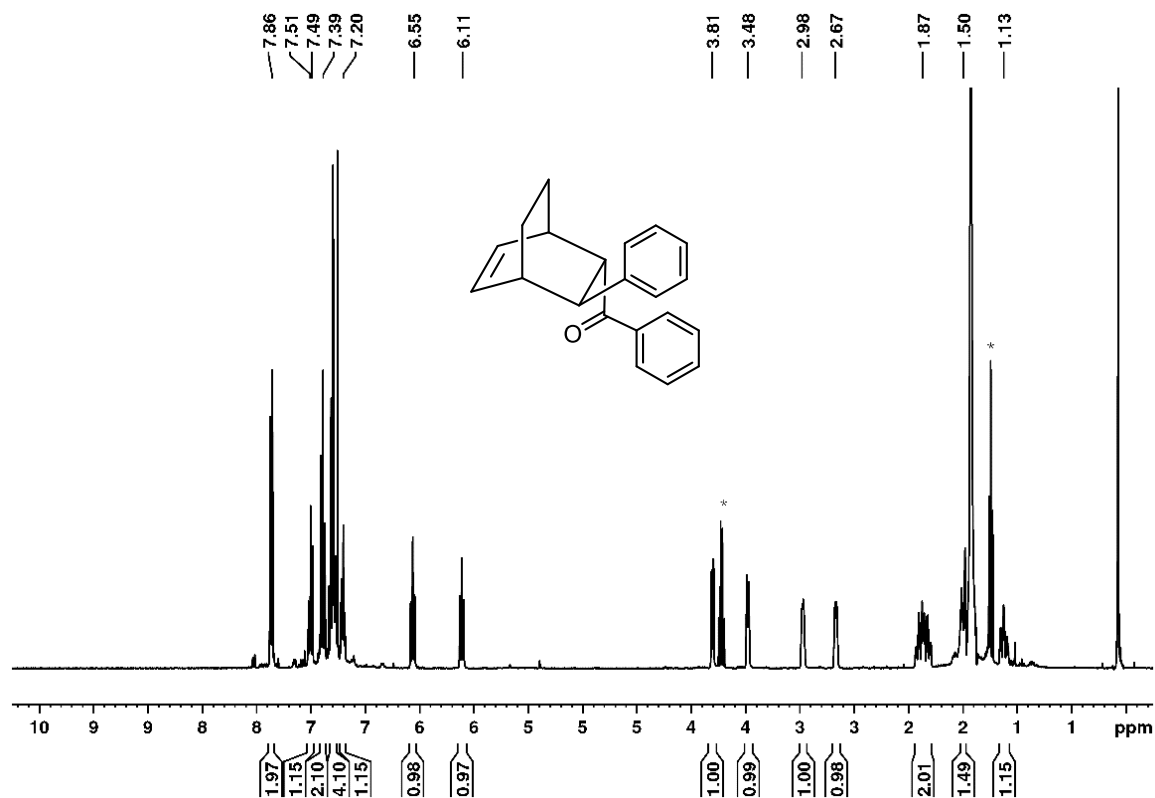

Figure S89. <sup>1</sup>H NMR spectrum of **P1**. Note: solvent impurities are indicated by \*

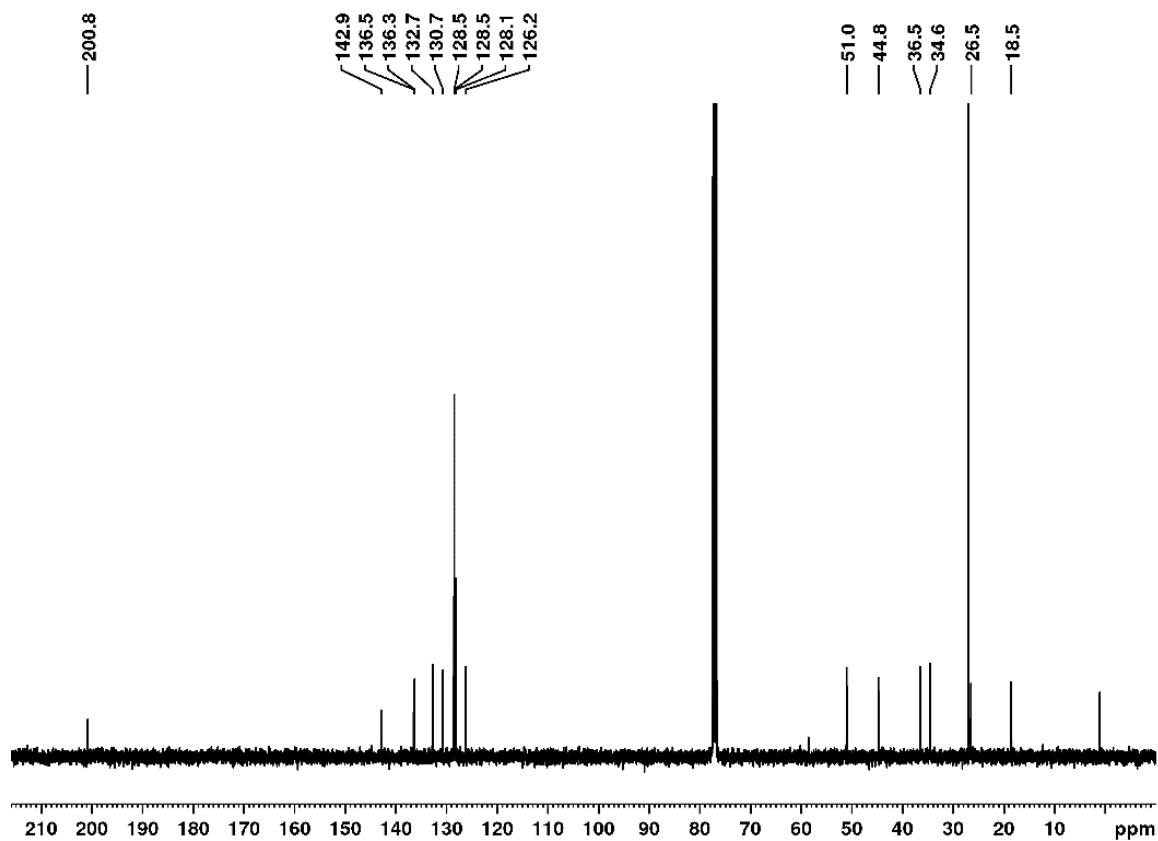

Figure S90. <sup>13</sup>C NMR spectrum of **P1**.

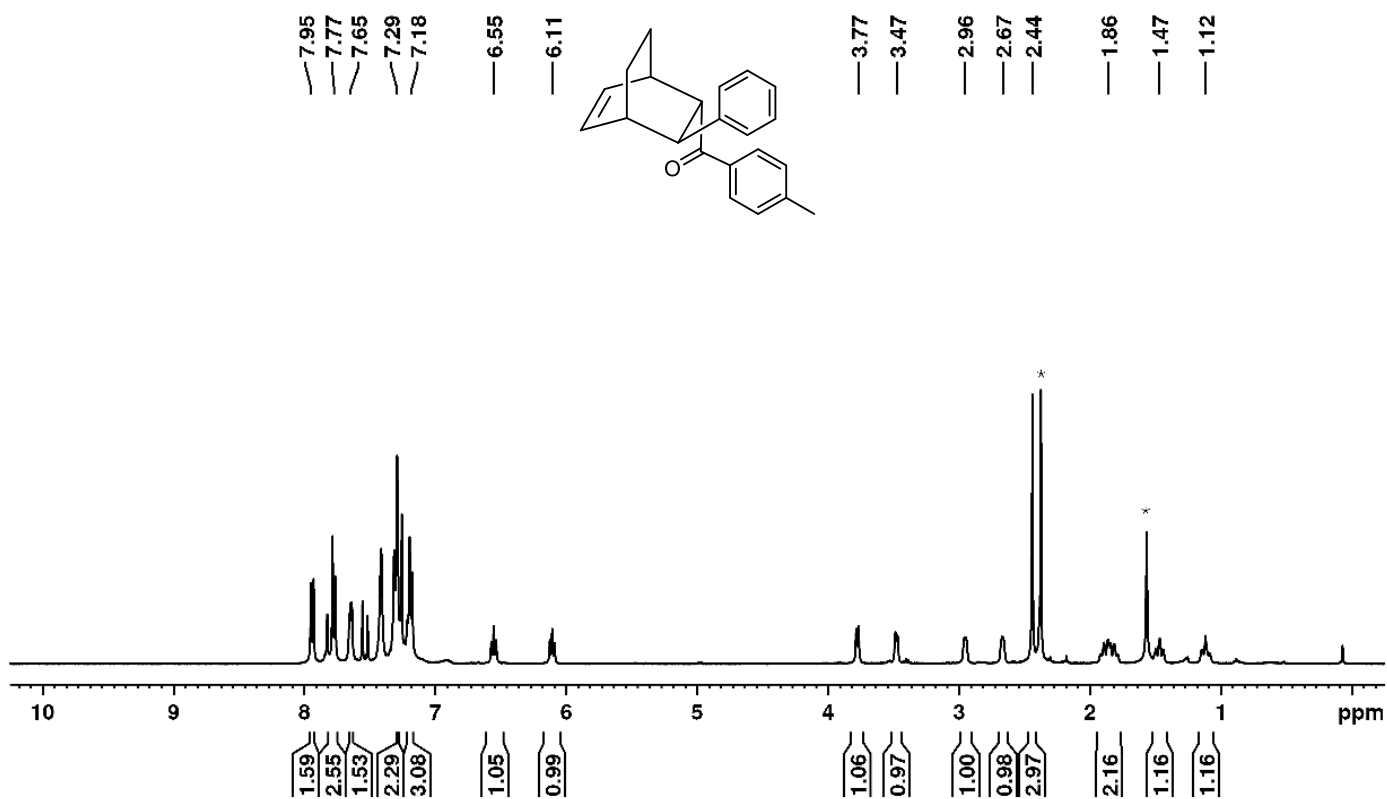

Figure S91. <sup>1</sup>H NMR spectrum of **P2**. Note: solvent impurities are indicated by \*

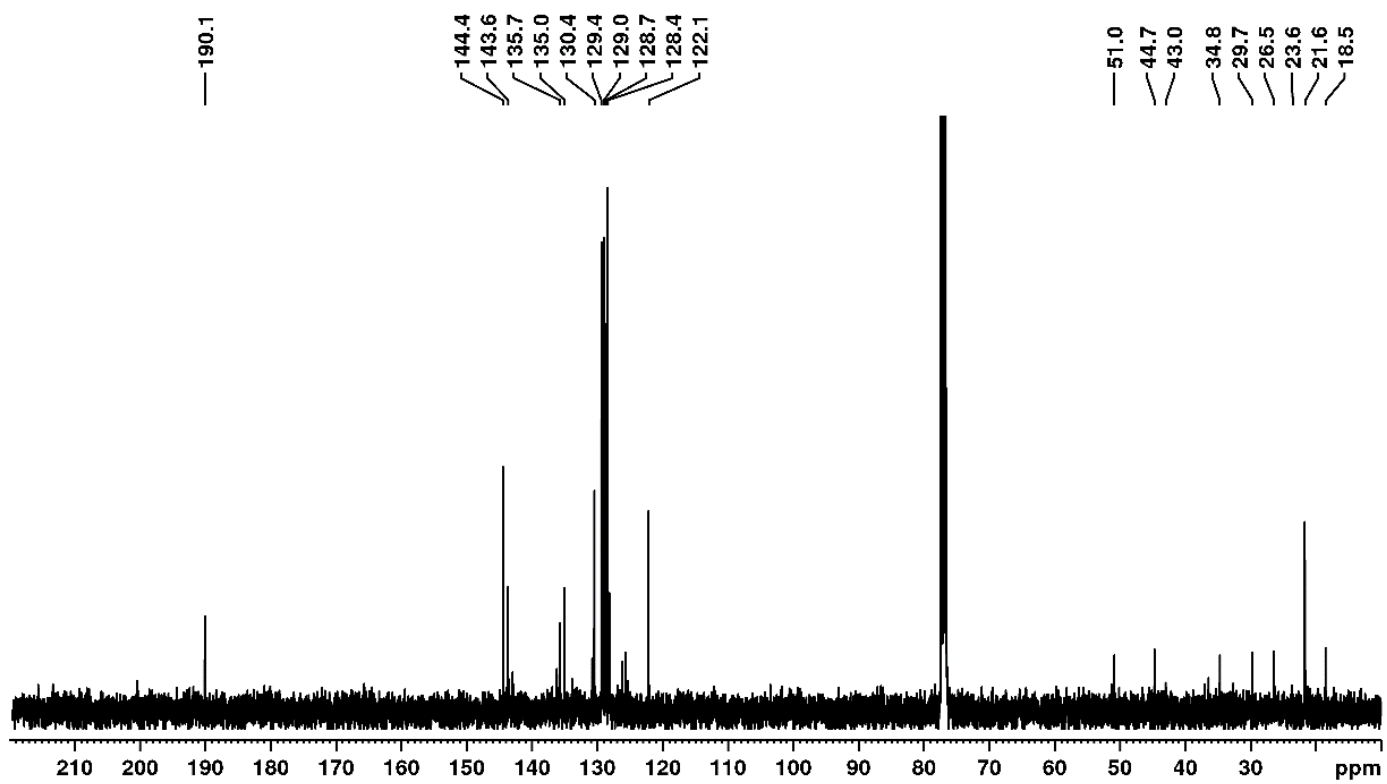

Figure S92. <sup>13</sup>C NMR spectrum of **P2**.



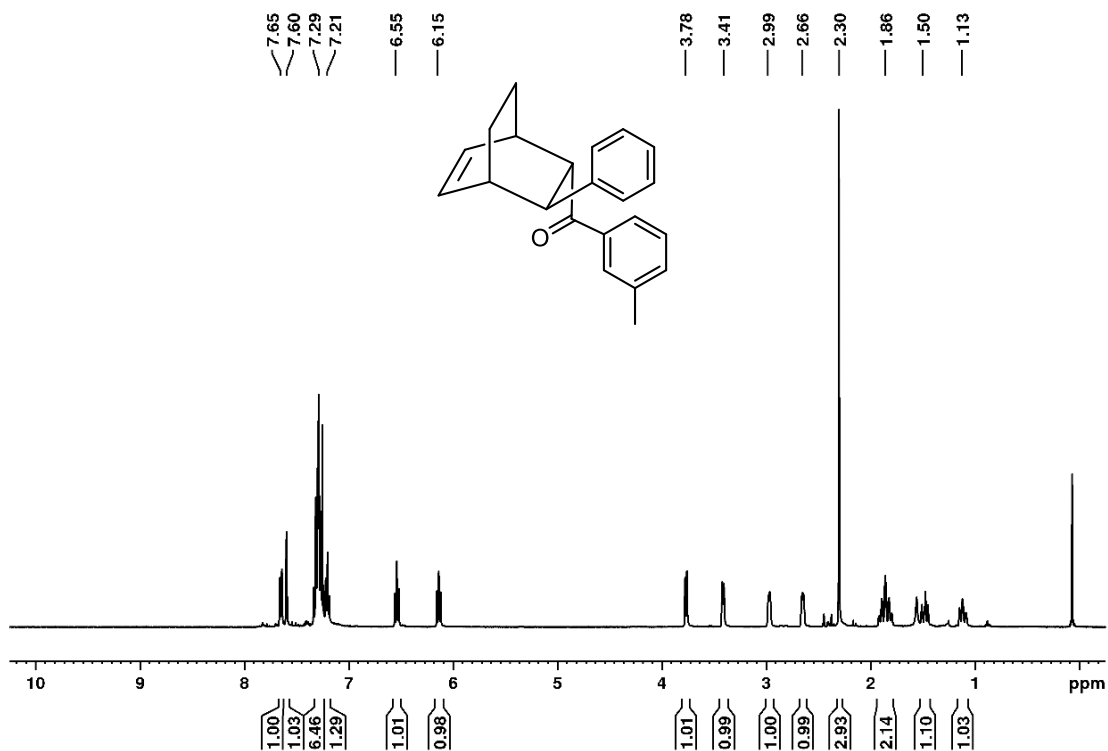

Figure S93. <sup>1</sup>H NMR spectrum of **P3**.

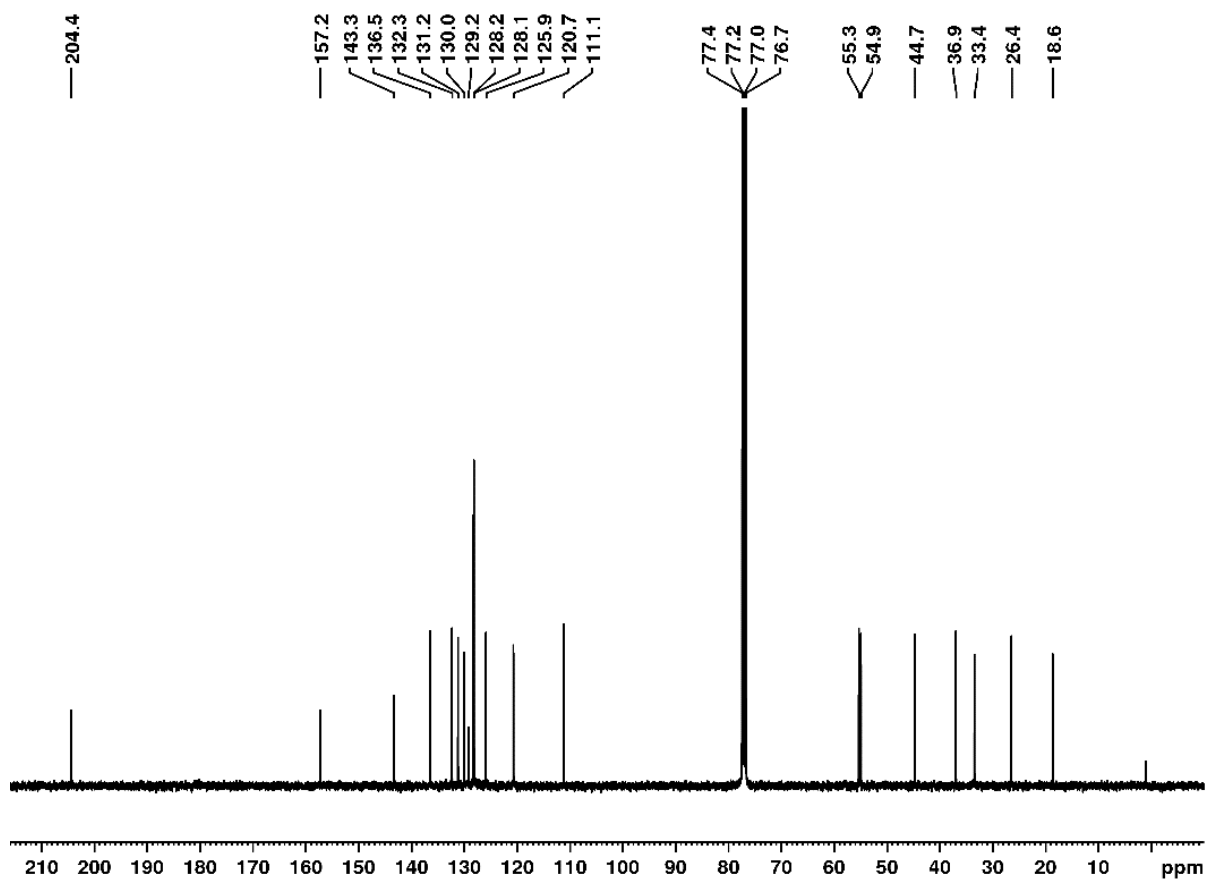

Figure S94. <sup>13</sup>C NMR spectrum of **P3**.

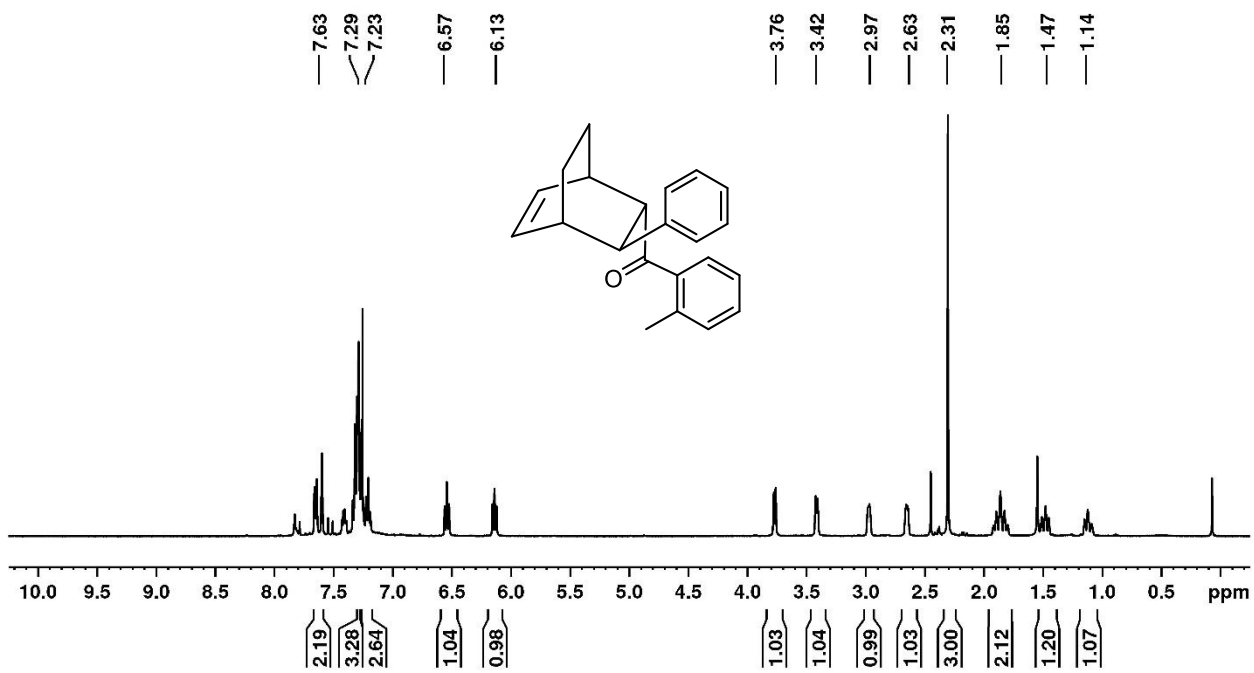

Figure S95.  $^1\text{H}$ NMR spectrum of **P4**.

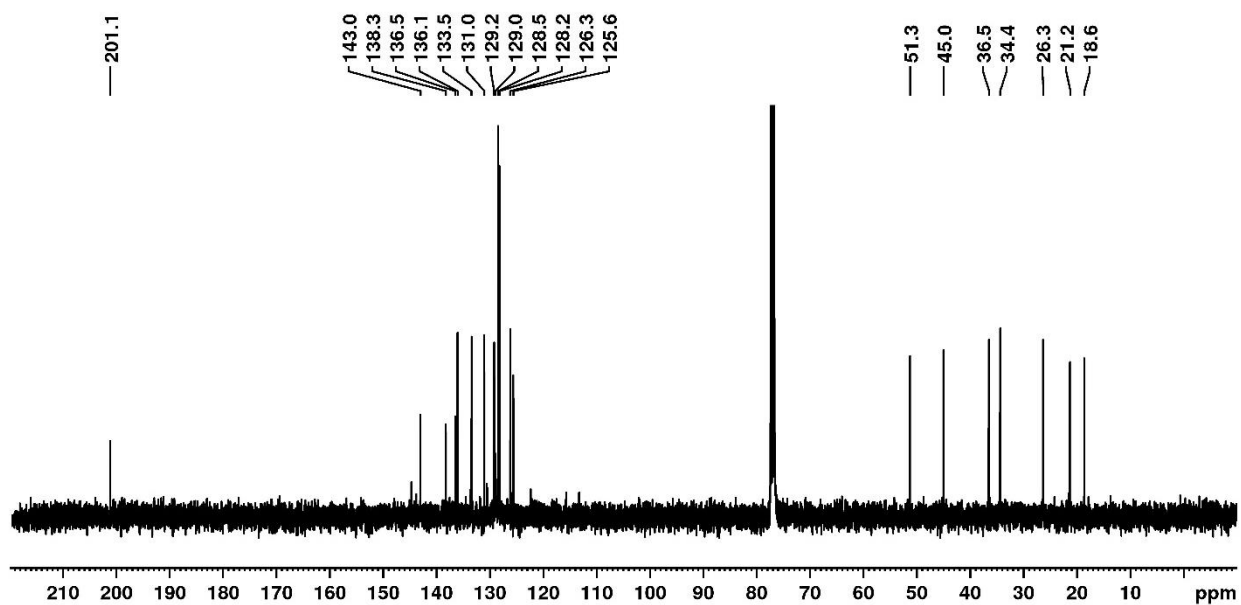

Figure S96.  $^{13}\text{C}$ NMR spectrum of **P4**.

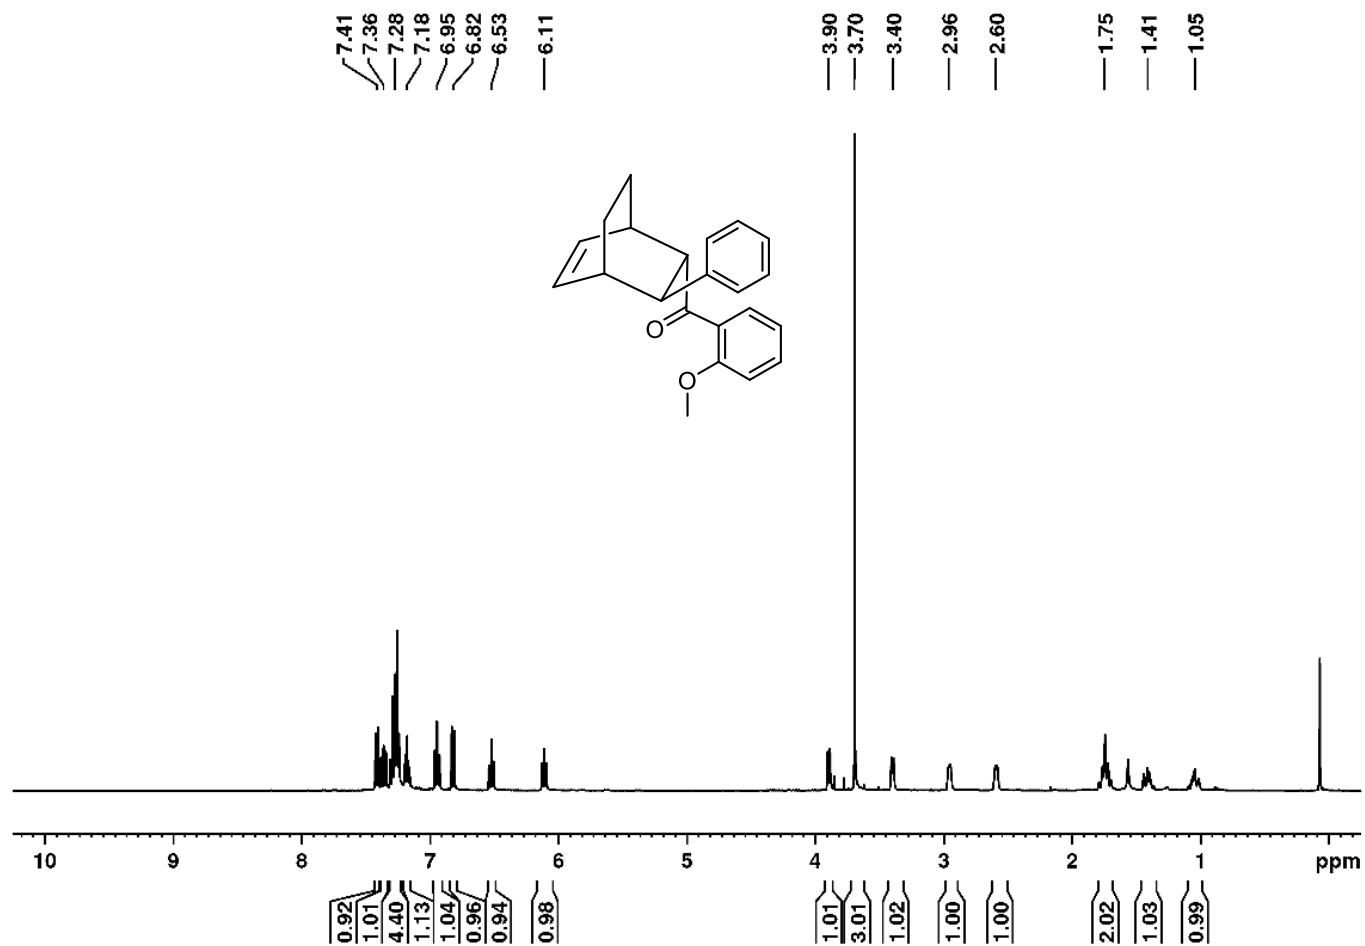

Figure S97. <sup>1</sup>H NMR spectrum of P5.

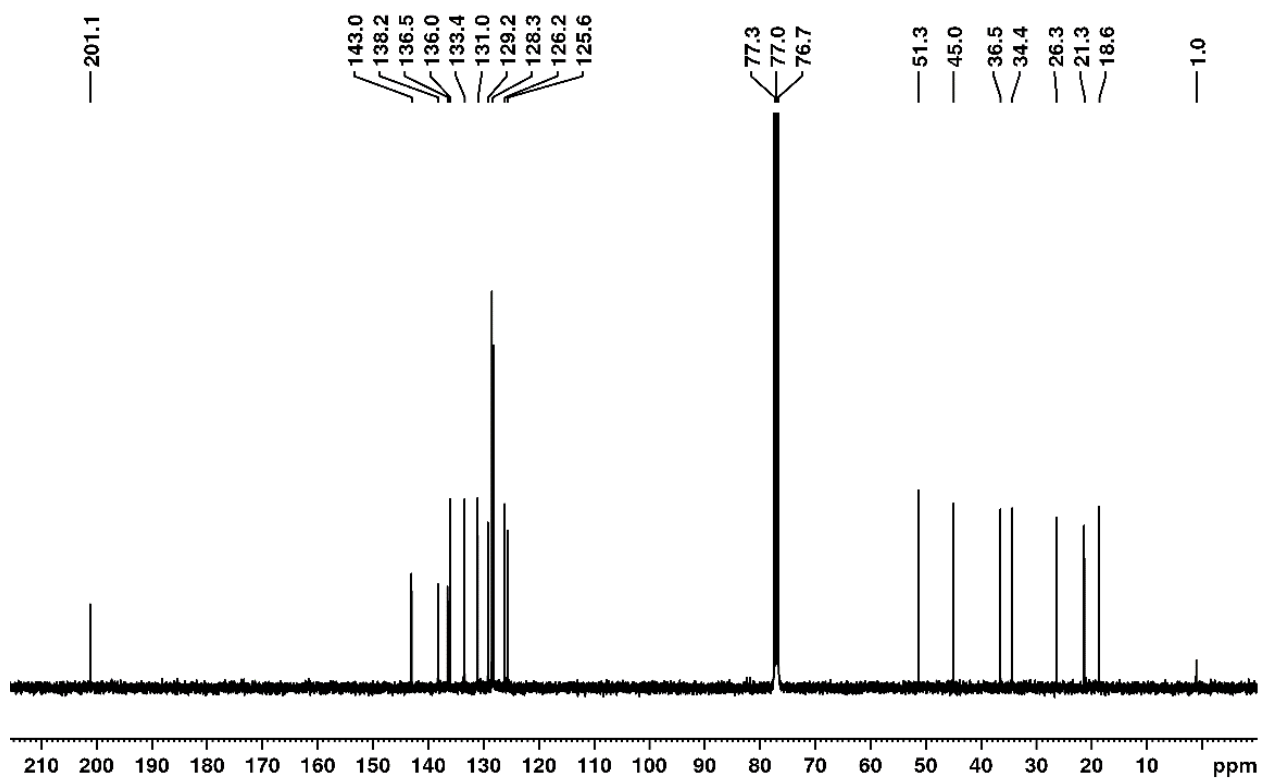

Figure S98. <sup>13</sup>C NMR spectrum of P5.

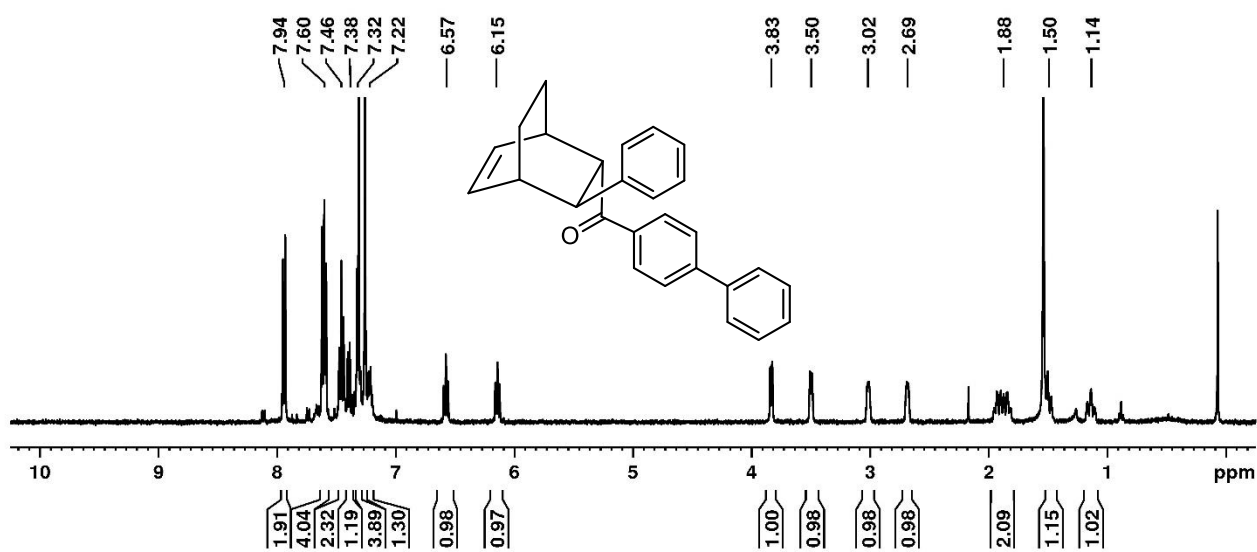

Figure S99.  $^1\text{H}$ NMR spectrum of **P6**.

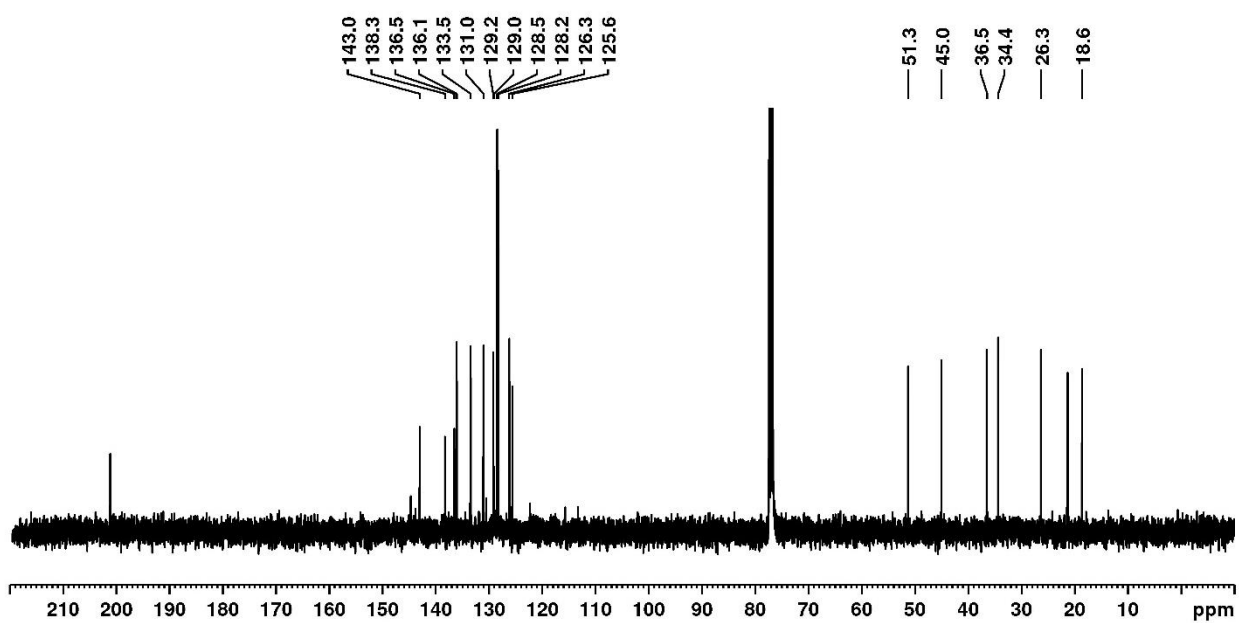

Figure S100.  $^{13}\text{C}$ NMR spectrum of **P**.

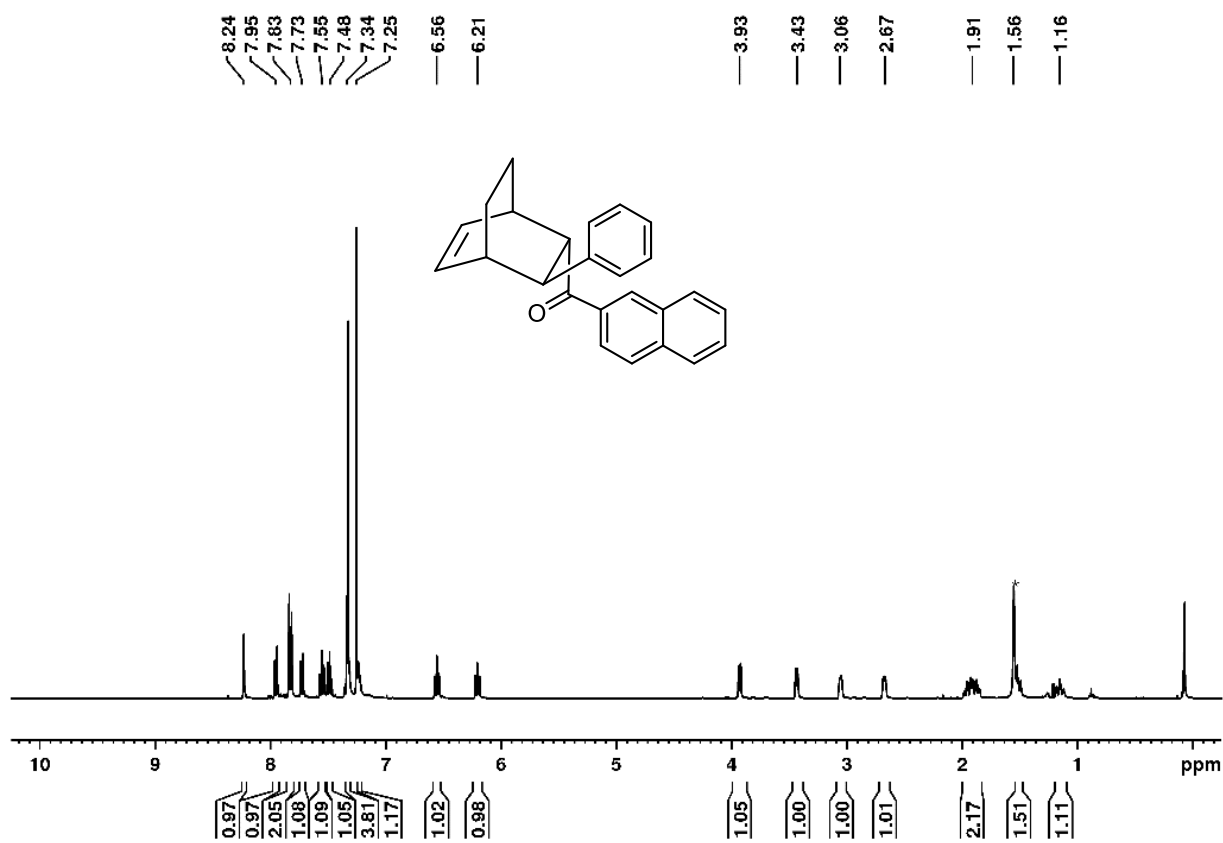

Figure S101. <sup>1</sup>H NMR spectrum of **P5**. Note: solvent impurities are indicated by \*

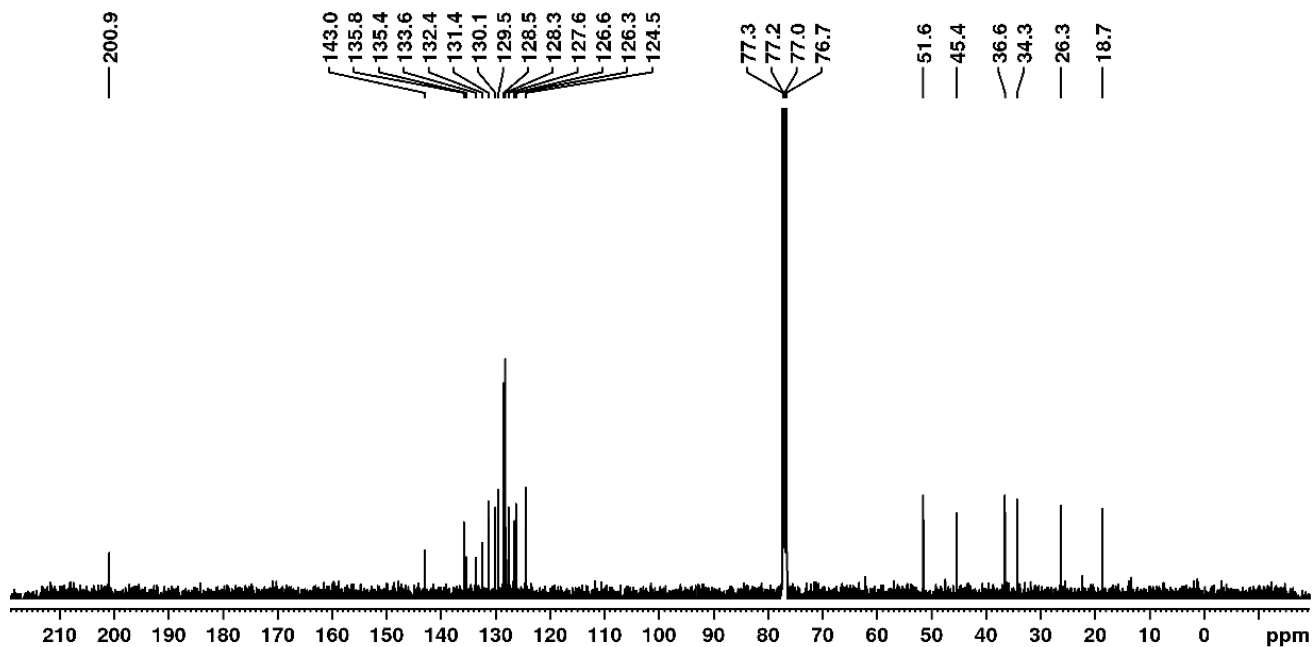

Figure S102. <sup>13</sup>C NMR spectrum of **P5**.

## HPLC studies of enantiomers

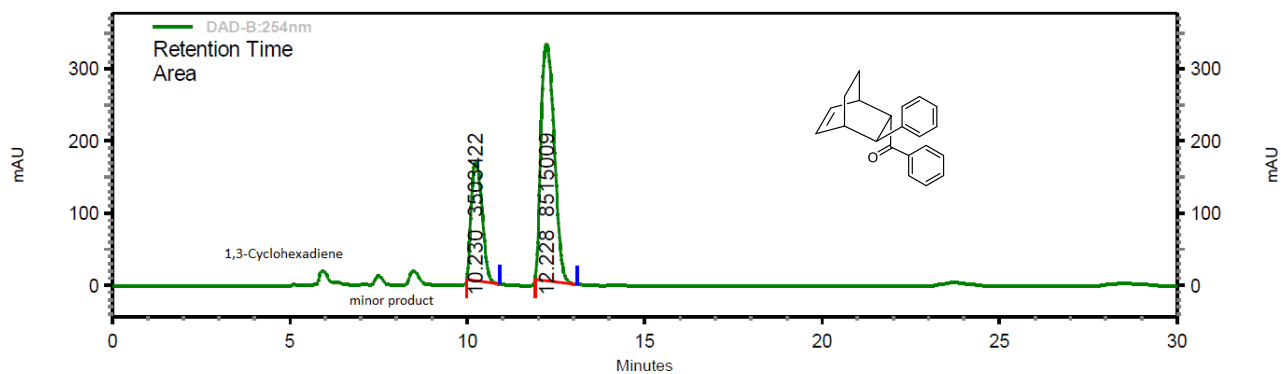

| Retention time | Area    | Area % |
|----------------|---------|--------|
| 10.230         | 3503422 | 29.15  |
| 12.228         | 8515009 | 70.85  |

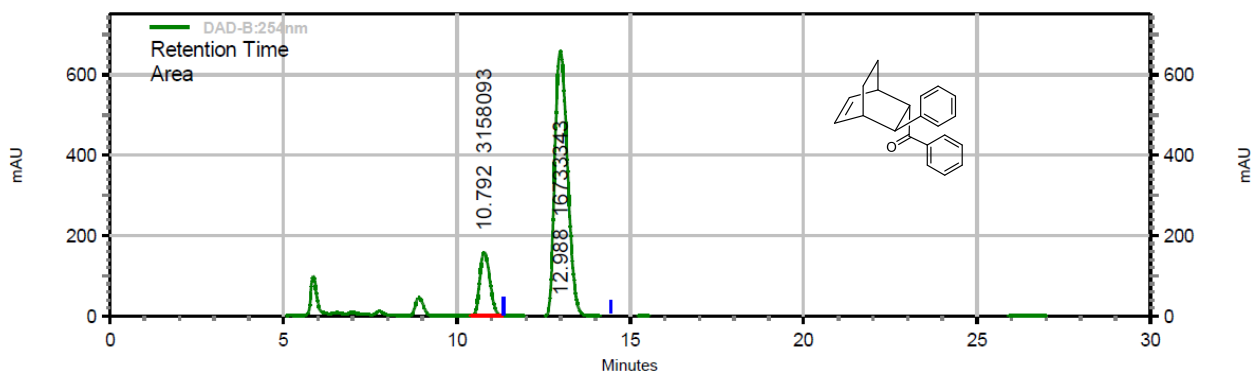

| Retention time | Area     | Area % |
|----------------|----------|--------|
| 10.792         | 3158093  | 15.88  |
| 12.988         | 16733343 | 84.12  |

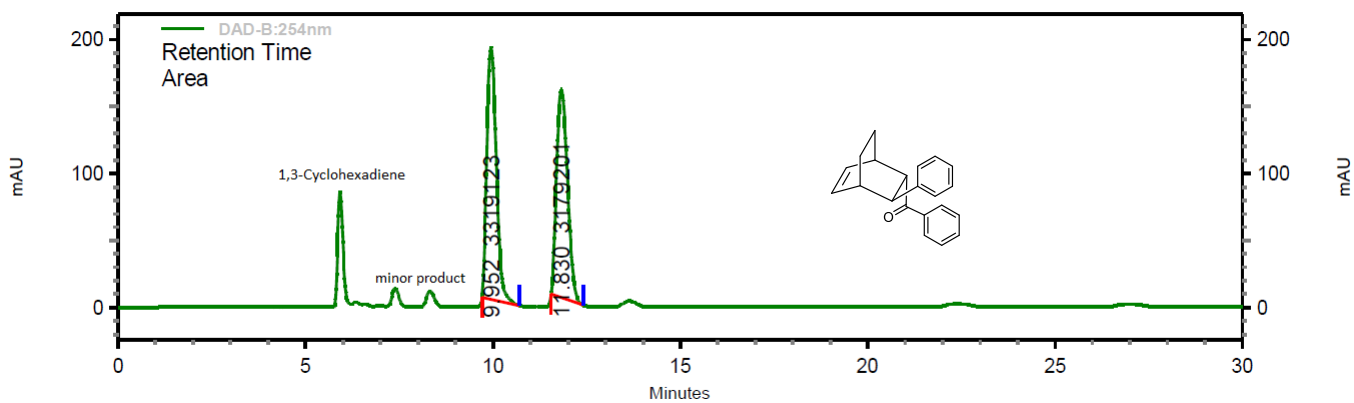

## Racemic mixture

| Retention time | Area    | Area % |
|----------------|---------|--------|
| 9.952          | 3319123 | 51.09  |
| 11.830         | 3179201 | 48.91  |

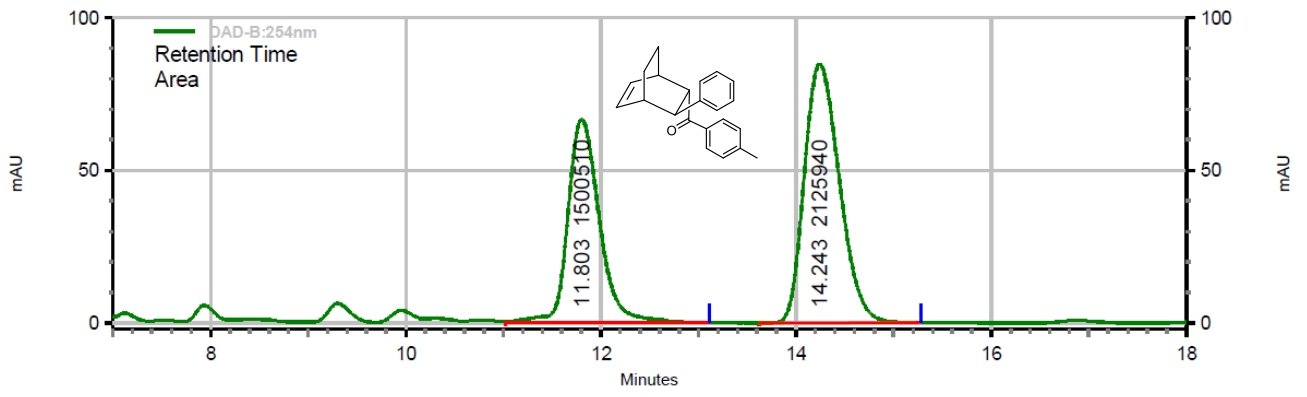

| Retention time | Area    | Area % |
|----------------|---------|--------|
| 11.803         | 1500510 | 41.37  |
| 14.243         | 2125940 | 58.63  |

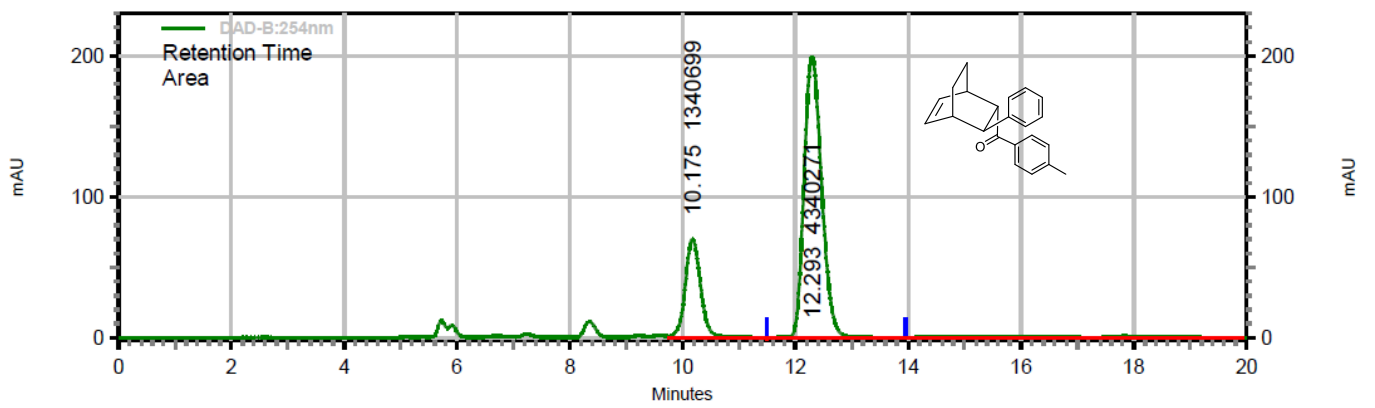

| Retention time | Area    | Area % |
|----------------|---------|--------|
| 10.175         | 1340699 | 23.60  |
| 12.293         | 4340271 | 76.40  |

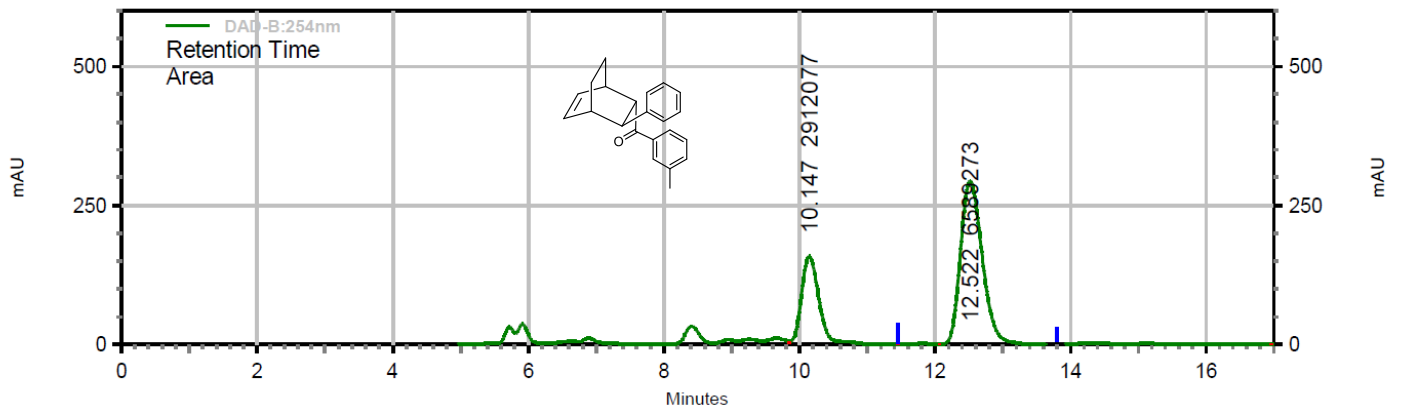

| Retention time | Area    | Area % |
|----------------|---------|--------|
| 10.147         | 2912077 | 30.65  |
| 12.522         | 6589273 | 69.35  |

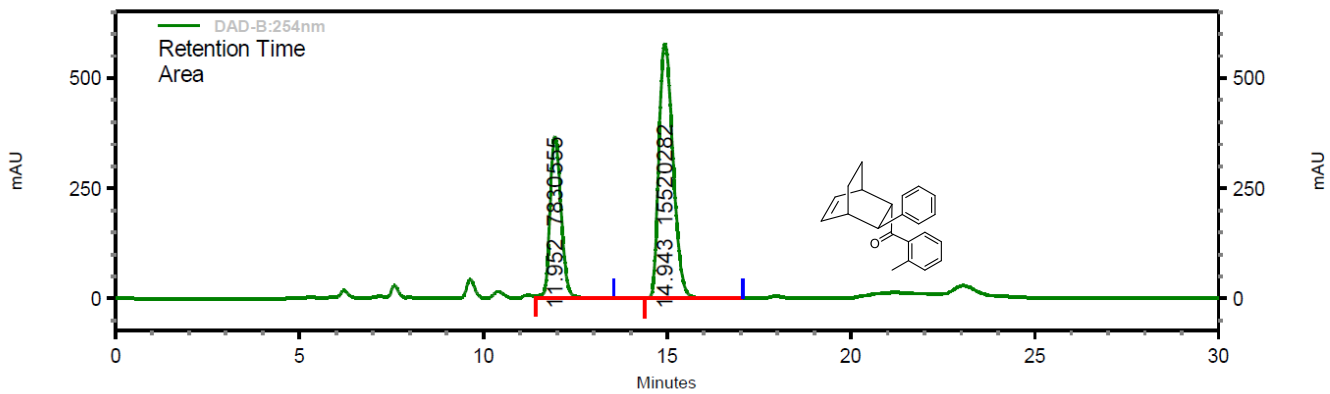

| Retention time | Area     | Area % |
|----------------|----------|--------|
| 11.952         | 7830555  | 33.53  |
| 14.943         | 15520282 | 66.47  |

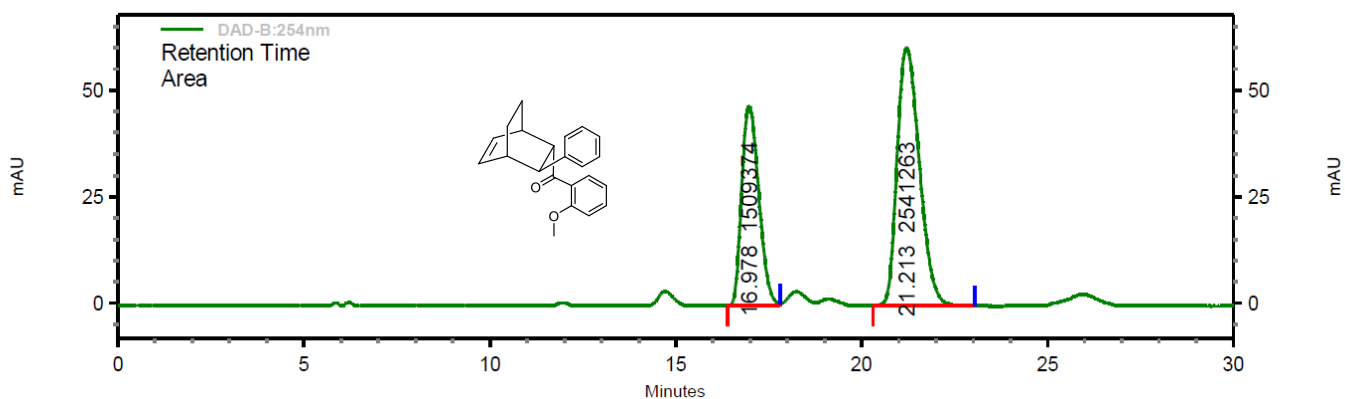

| Retention time | Area    | Area % |
|----------------|---------|--------|
| 16.978         | 1509374 | 37.26  |
| 21.213         | 2541263 | 62.74  |

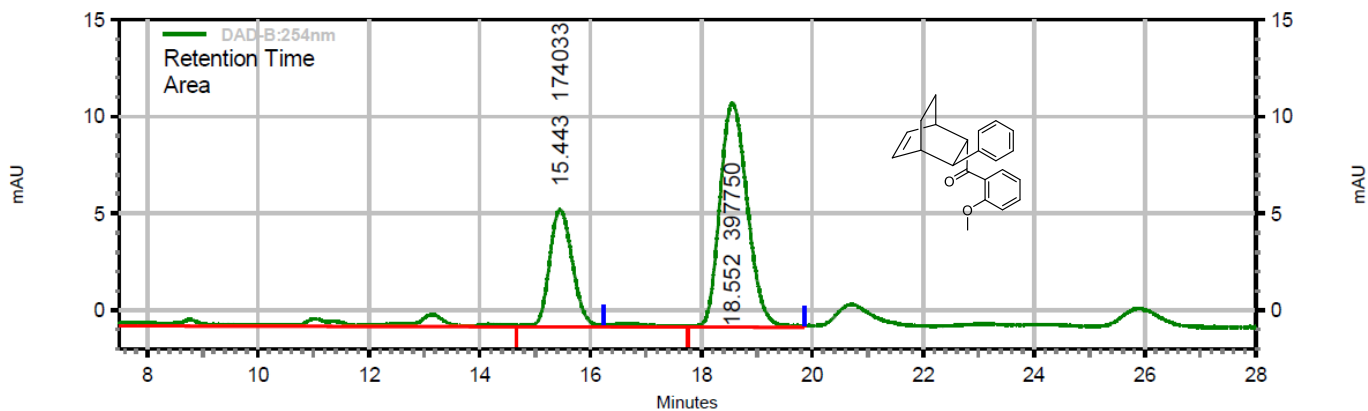

| Retention time | Area   | Area % |
|----------------|--------|--------|
| 15.443         | 174033 | 30.43  |
| 18.552         | 397750 | 69.56  |



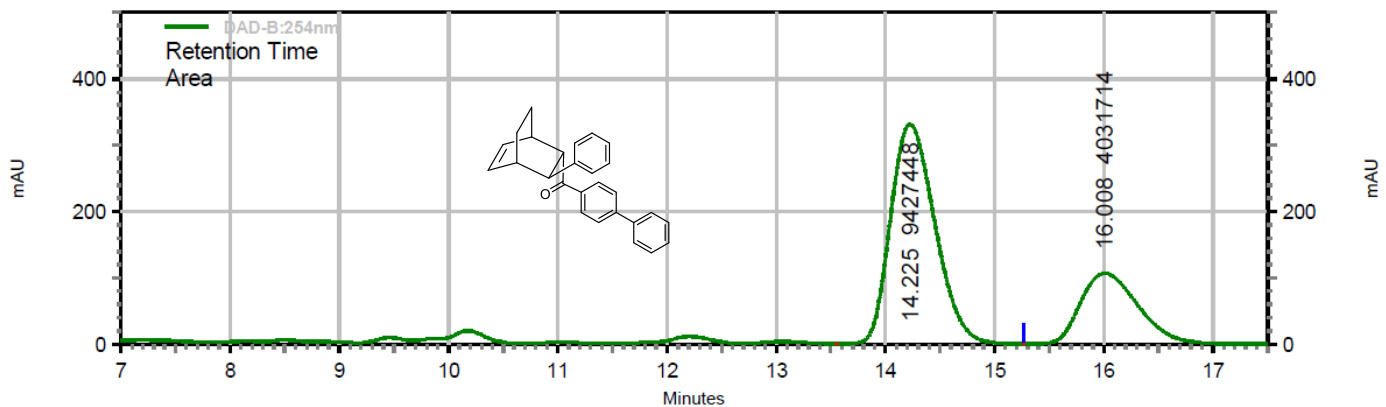

| Retention time | Area    | Area % |
|----------------|---------|--------|
| 14.225         | 9427448 | 70.04  |
| 16.008         | 4031714 | 29.96  |

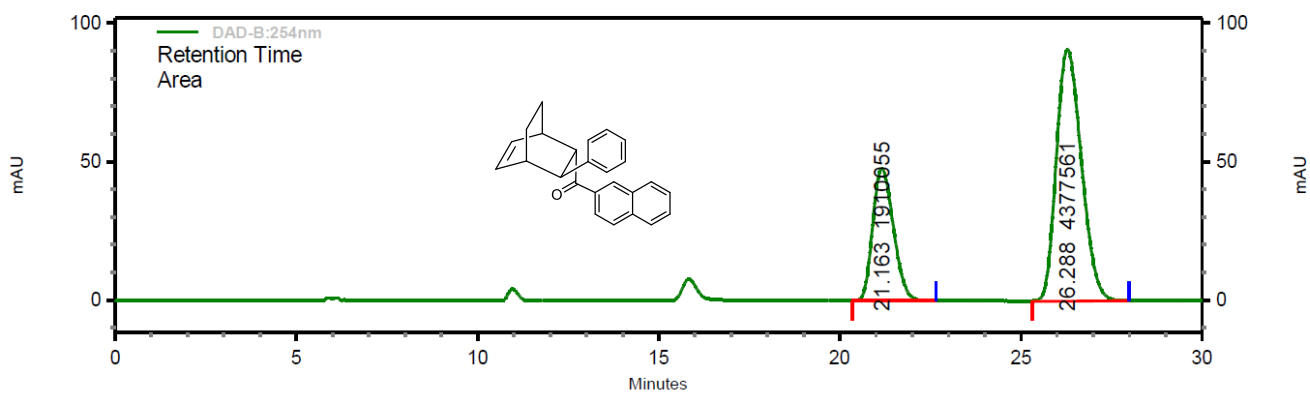

| Retention time | Area    | Area % |
|----------------|---------|--------|
| 21.163         | 1910055 | 30.38  |
| 26.288         | 4377561 | 69.62  |

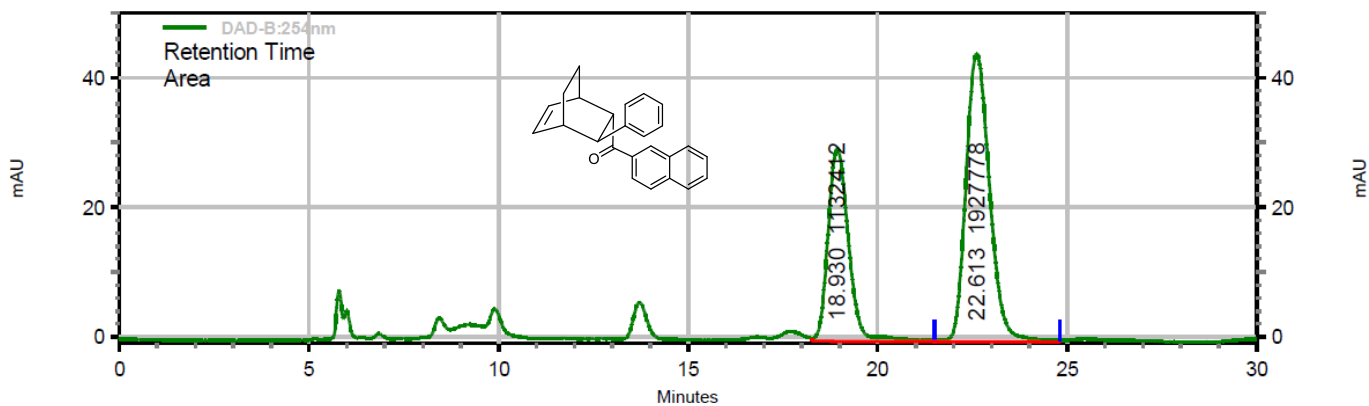

| Retention time | Area    | Area % |
|----------------|---------|--------|
| 18.930         | 1132412 | 37.00  |
| 22.613         | 1927778 | 63.00  |
